# Supplementary material for: Contribution of the Broiler Breeders’ Fecal Microbiota to the Establishment of the Eggshell Microbiota
Source: Front Microbiol. 2020 Apr 15;11:666. doi: 10.3389/fmicb.2020.00666 (PMC7176364; doi:10.3389/fmicb.2020.00666)
Supplement: TABLE S2 — Total phyla, families and genera found in feces and/or eggshell samples according to Silva and RDP databases. [file Table_2.XLSX]

## Sheet: Feuil1
Total phyla, families and genera found in the samples
FECES												EGGSHELLS
Silva						RDP						Silva						RDP
Phyla	Percentage of reads	Families	Percentage of reads	Genera	Percentage of reads	Phyla	Percentage of reads	Families	Percentage of reads	Genera	Percentage of reads	Phyla	Percentage of reads	Families	Percentage of reads	Genera	Percentage of reads	Phyla	Percentage of reads	Families	Percentage of reads	Genera	Percentage of reads
Euryarchaeota	0.154985573477251	Halobacteriaceae	0.0000340328444174904	Natrialba	0.0000340328444174904	Euryarchaeota	0.154986311924757	Natrialbaceae	0.0000340330065710929	Natrialba	0.0000340330065710929	Euryarchaeota	0.115334	Halobacteriaceae	0.00193027	Halococcus	0.000482567	Euryarchaeota	0.115343	Halobacteriaceae	0.000482607	Halococcus	0.000482607
Cyanobacteria	0.02671578286773	Methanobacteriaceae	0.148672480837807	Methanobrevibacter	0.148672480837807	Deinococcus-Thermus	0.00204198039426557	Methanobacteriaceae	0.148673189205819	Methanobrevibacter	0.148673189205819	Thaumarchaeota	0.00193027	Methanobacteriaceae	0.0525998	Halostagnicola	0.000482567	Thaumarchaeota	0.00193043	Natrialbaceae	0.00144782	Halostagnicola	0.000482607
Deferribacteres	0.00182075717633574	Methanocorpusculaceae	0.00573453428434714	Methanocorpusculum	0.00573453428434714	Elusimicrobia	0.00221214542712104	Methanocorpusculaceae	0.00573456160722915	Methanocorpusculum	0.00573456160722915	Acidobacteria	0.0304017	Methanocorpusculaceae	0.0120642	Methanobacteriaceae_unclassified	0.000482567	Acidobacteria	0.029439	Methanobacteriaceae	0.0526041	Natronorubrum	0.000965214
Deinococcus-Thermus	0.00212705277609315	Methanosarcinaceae	0.0000340328444174904	Methanosarcina	0.0000340328444174904	Firmicutes	76.6159382015053	Methanosarcinaceae	0.0000340330065710929	Methanosarcina	0.0000340330065710929	Cyanobacteria	0.931355	Thermoplasmatales_Incertae_Sedis	0.0487393	Methanobrevibacter	0.0477742	Deinococcus-Thermus	0.171808	Methanocorpusculaceae	0.0120652	Methanobrevibacter	0.0482607
Elusimicrobia	0.00221213488713688	Thermoplasmatales_Incertae_Sedis	0.000510492666262356	Methanomassiliicoccus	0.0000340328444174904	Fusobacteria	0.886389656144115	Methanomassiliicoccaceae	0.000510495098566394	Methanomassiliicoccus	0.000510495098566394	Deferribacteres	0.0284715	Soil_Crenarchaeotic_Group(SCG)_fa	0.00193027	Methanosphaera	0.00434311	Elusimicrobia	0.0400564	Methanomassiliicoccaceae	0.0463303	Methanosphaera	0.00434346
Firmicutes	76.6498952809377	Cyanobacteria_unclassified	0.0000510492666262356	Thermoplasmatales_Incertae_Sedis_unclassified	0.000170164222087452	Lentisphaerae	0.000595577614994126	Deinococcaceae	0.00156551830227027	Deinococcaceae_unclassified	0.0000340330065710929	Deinococcus-Thermus	0.179998	Acidobacteriaceae_(Subgroup_1)	0.0028954	Methanocorpusculum	0.0120642	Fibrobacteres	0.00289564	Thermoplasmata_unclassified	0.00241303	Methanocorpusculum	0.0120652
Fusobacteria	0.886385432853538	Gastranaerophilales_fa	0.0266647336011038	Cyanobacteria_unclassified	0.0000510492666262356	Nitrospirae	0.0000170165032855465	Deinococcales_unclassified	0.000204198039426557	Deinococcus	0.00153148529569918	Elusimicrobia	0.0410182	Blastocatellaceae_(Subgroup_4)	0.0101339	Candidatus_Methanoplasma	0.000965135	Firmicutes	53.6224	Nitrososphaera	0.00193043	Methanomassiliicoccus	0.0463303
Hydrogenedentes	0.0000170164222087452	Deferribacteraceae	0.00182075717633574	Gastranaerophilales_ge	0.0266647336011038	Planctomycetes	0.0000680660131421858	Trueperaceae	0.000272264052568743	Deinococcales_unclassified	0.000204198039426557	FBP	0.00434311	ABS-19	0.000965135	Methanomassiliicoccus	0.00675594	Fusobacteria	0.103278	Acidobacteria_Gp1_unclassified	0.000482607	Thermoplasmata_unclassified	0.00241303
Actinobacteria	12.9485613976336	Deinococcaceae	0.00156551084320456	Mucispirillum	0.00182075717633574	Actinobacteria	12.9460876336306	Elusimicrobiaceae	0.00221214542712104	Truepera	0.000272264052568743	Fibrobacteres	0.00386054	Subgroup_7_fa	0.000965135	Thermoplasmatales_Incertae_Sedis_unclassified	0.028954	Gemmatimonadetes	0.00482607	Gp1_unclassified	0.000482607	Nitrososphaera_unclassified	0.00193043
Lentisphaerae	0.0010550181769422	Trueperaceae	0.000561541932888592	Deinococcaceae_unclassified	0.0000850821110437261	Proteobacteria	4.31478965559959	Alicyclobacillaceae	0.0000510495098566394	Elusimicrobium	0.00221214542712104	Firmicutes	54.2763	Solibacteraceae_(Subgroup_3)	0.0028954	uncultured	0.0120642	Lentisphaerae	0.0998996	Granulicella_unclassified	0.000482607	Acidobacteria_Gp1_unclassified	0.000482607
Nitrospirae	0.0000170164222087452	Elusimicrobiaceae	0.00221213488713688	Deinococcus	0.00148042873216083	Spirochaetes	0.000561544608423033	Paenibacillaceae_1	0.000714693137992951	Alicyclobacillus	0.0000340330065710929	Fusobacteria	0.103269	Subgroup_17_fa	0.000482567	Soil_Crenarchaeotic_Group(SCG)_ge	0.00193027	Nitrospirae	0.00144782	Terriglobus_unclassified	0.00144782	Gp1_unclassified	0.000482607
Planctomycetes	0.0000680656888349809	Alicyclobacillaceae	0.0000510492666262356	Truepera	0.000561541932888592	Synergistetes	0.0865799687168604	Paenibacillaceae_2	0.000901874674133962	Tumebacillus	0.0000170165032855465	Gemmatimonadetes	0.0154422	Subgroup_25_fa	0.000482567	Acidobacteriaceae_(Subgroup_1)_unclassified	0.000482567	Parcubacteria	0.000482607	Gp10_unclassified	0.000965214	Granulicella_unclassified	0.000482607
Proteobacteria	4.31551781993767	Staphylococcaceae	3.13500352920597	Elusimicrobium	0.00221213488713688	Tenericutes	0.0454510802756946	Planococcaceae	0.0685594917374667	Brevibacillus	0.000323313562425383	Actinobacteria	23.2071	Subgroup_6_fa	0.00965135	Granulicella	0.000482567	Planctomycetes	0.0279912	Gp16_unclassified	0.000965214	Terriglobus_unclassified	0.00144782
Saccharibacteria	0.0143958931885985	Thermoactinomycetaceae	0.000527509088471102	Alicyclobacillus	0.0000340328444174904	Verrucomicrobia	0.0605787516965454	Staphylococcaceae	3.18955635933954	Paenibacillaceae_1_unclassified	0.0000680660131421858	Ignavibacteriae	0.000482567	Subgroup_6_unclassified	0.00193027	Terriglobus	0.0014477	Actinobacteria	23.1574	Gp17_unclassified	0.000482607	Gp10_unclassified	0.000965214
Spirochaetae	0.000765738999393535	Bacillaceae	0.129631104386221	Tumebacillus	0.0000170164222087452	Bacteria_unclassified	0.421107406807418	Thermoactinomycetaceae_1	0.000510495098566394	Paenibacillus	0.000323313562425383	Lentisphaerae	0.148631	Chloroplast_fa	0.00241284	Aridibacter	0.000482567	Proteobacteria	7.90751	Gp25_unclassified	0.000482607	Gp16_unclassified	0.000965214
Synergistetes	0.0868858517978531	Bacillales_unclassified	0.0373170139037783	Aliicoccus	0.0381678350142155	Bacteroidetes	4.43254385833557	Bacillaceae_1	0.00262054150597415	Ammoniphilus	0.000799775654420683	Nitrospirae	0.0014477	Cyanobacteria_unclassified	0.000482567	Blastocatella	0.0014477	SR1	0.00241303	Acidobacteria_Gp3_unclassified	0.000482607	Gp17_unclassified	0.000482607
Tenericutes	0.246653039915762	Family_XII	0.0000510492666262356	Jeotgalicoccus	0.965205500524446	Candidatus_Saccharibacteria	0.00893366422491189	Bacillaceae_2	0.114997529203723	Aneurinibacillus	0.0000510495098566394	Parcubacteria	0.000965135	Gastranaerophilales_fa	0.927012	Blastocatellaceae_(Subgroup_4)_unclassified	0.00241284	Spirochaetes	0.0212347	Gp3_unclassified	0.00241303	Gp25_unclassified	0.000482607
Verrucomicrobia	0.0607996765518467	Listeriaceae	0.000221213488713688	Macrococcus	0.00309698884199163	Chlamydiae	0.00228021144026322	Bacillales_Incertae_Sedis_XII	0.0000680660131421858	Paenibacillaceae_2_unclassified	0.0000510495098566394	Planctomycetes	0.0376402	Obscuribacterales_fa	0.0014477	Pyrinomonas	0.00193027	Synergistetes	0.0854214	Acidobacteria_Gp4_unclassified	0.00434346	Acidobacteria_Gp3_unclassified	0.000482607
Bacteria_unclassified	0.258564535461884	Paenibacillaceae	0.00173567506529201	Nosocomiicoccus	0.00866135890425132	Chloroflexi	0.0170165032855465	Bacillales_incertae_sedis	0.0000170165032855465	Ureibacillus	0.0000170165032855465	Proteobacteria	8.04922	Deferribacteraceae	0.0284715	Stenotrophobacter	0.0014477	Tenericutes	0.0221999	Aridibacter_unclassified	0.00193043	Gp3_unclassified	0.00241303
Bacteroidetes	4.31631759178148	Planococcaceae	0.0714009075878949	Salinicoccus	0.433084961634774	Deferribacteres	0.00182076585155347	Bacillales_unclassified	0.0663983958202023	Caryophanon	0.0000340330065710929	RsaHf231	0.00241284	Deinococcaceae	0.14477	ABS-19_ge	0.000965135	Thermotogae	0.000482607	Blastocatella_unclassified	0.00144782	Acidobacteria_Gp4_unclassified	0.00434346
Chlamydiae	0.00228020057597186	Bacilli_unclassified	0.470946501049233	Staphylococcaceae_unclassified	0.911944099011074			Listeriaceae	0.000221214542712104	Kurthia	0.00983553889904585	SR1_(Absconditabacteria)	0.00337797	Trueperaceae	0.0313669	Subgroup_7_ge	0.000965135	Verrucomicrobia	0.113895	Pyrinomonas_unclassified	0.00193043	Aridibacter_unclassified	0.00193043
Chloroflexi	0.0221213488713688	Aerococcaceae	0.249596880957875	Staphylococcus	0.774842785275213			Bacilli_unclassified	0.443194828072057	Lysinibacillus	0.000102099019713279	Saccharibacteria	0.147183	Thermaceae	0.00386054	Bryobacter	0.00241284	candidate_division_WPS-1	0.00241303	Gp6_unclassified	0.0101347	Blastocatella_unclassified	0.00144782
		Carnobacteriaceae	0.135757016381369	Kroppenstedtia	0.000187180644296197			Aerococcaceae	0.234096035699263	Planococcaceae_unclassified	0.0220363717547827	Spirochaetae	0.0328146	Elusimicrobiaceae	0.0410182	Solibacteraceae_(Subgroup_3)_unclassified	0.000482567	Armatimonadetes	0.00193043	Gp7_unclassified	0.000965214	Pyrinomonas_unclassified	0.00193043
		Enterococcaceae	7.56519501840837	Thermoactinomyces	0.000323312021966159			Carnobacteriaceae	0.0900683518903974	Sporosarcina	0.0365344325540682	Armatimonadetes	0.0028954	FBP_fa	0.00434311	Subgroup_17_ge	0.000482567	Bacteria_unclassified	6.18316	Deinococcaceae	0.144299	Gp6_unclassified	0.0101347
		Lactobacillaceae	27.5236034792458	Thermoactinomycetaceae_unclassified	0.0000170164222087452			Enterococcaceae	7.5814988408358	Jeotgalicoccus	1.07110379930872	Synergistetes	0.0849318	Fibrobacteraceae	0.00386054	Subgroup_25_ge	0.000482567	Bacteroidetes	8.04988	Deinococcales_unclassified	0.00386085	Gp7_unclassified	0.000965214
		Lactobacillales_unclassified	1.55368442976948	Amphibacillus	0.00893362165959124			Lactobacillaceae	27.5636042859807	Macrococcus	0.0197561603145194	TM6_(Dependentiae)	0.000965135	Staphylococcaceae	7.42044	Subgroup_6_ge	0.00965135	Candidatus_Saccharibacteria	0.126926	Trueperaceae	0.0193043	Deinococcus	0.144299
		Leuconostocaceae	0.00646624043932318	Lentibacillus	0.0211854456498878			Lactobacillales_unclassified	1.32340749352352	Nosocomiicoccus	0.00122518823655934	Tenericutes	3.09615	Thermoactinomycetaceae	0.000482567	Subgroup_6_unclassified	0.00193027	Chlamydiae	0.0197869	Deinococci_unclassified	0.000482607	Deinococcales_unclassified	0.00386085
		Streptococcaceae	12.8131617261186	Oceanobacillus	0.000306295599757414			Leuconostocaceae	0.00634715572550883	Salinicoccus	0.874205839791664	Thermotogae	0.000482567	Bacillaceae	1.14851	Chloroplast_ge	0.00241284	Chloroflexi	0.0550172	Thermaceae	0.00386085	Truepera	0.0193043
		TSCOR001-H18_fa	0.0000510492666262356	Ornithinibacillus	0.0000680656888349809			Streptococcaceae	12.9281182061611	Staphylococcaceae_unclassified	0.229756827361448	Verrucomicrobia	0.132706	Bacillales_unclassified	0.415008	Cyanobacteria_unclassified	0.000482567	Deferribacteres	0.0284738	Elusimicrobiaceae	0.0400564	Deinococci_unclassified	0.000482607
		Clostridia_unclassified	0.00741916008301291	Pseudogracilibacillus	0.00335223517512281			Clostridia_unclassified	0.0191775992028109	Staphylococcus	0.99350854432663	BJ-169	0.000965135	Family_X	0.000482567	Gastranaerophilales_ge	0.927012			Fibrobacteraceae	0.00289564	Meiothermus	0.00144782
		Family_XI	0.131111533118382	Ureibacillus	0.0000170164222087452			Catabacteriaceae	0.0000170165032855465	Thermoactinomyces	0.000323313562425383	BRC1	0.0028954	Family_XI	0.0014477	Obscuribacterales_ge	0.0014477			Paenibacillaceae_1	0.0139956	Thermus	0.00241303
		Family_XIII	0.0584684267092486	Virgibacillus	0.00042541055521863			Lachnospiraceae	3.00097946992912	Thermoactinomycetaceae_1_unclassified	0.000187181536141011	Bacteria_unclassified	1.02546	Family_XII	0.00337797	Mucispirillum	0.0284715			Paenibacillaceae_2	0.029439	Elusimicrobium	0.0400564
		Lachnospiraceae	3.12481069230293	Bacillaceae_unclassified	0.0585024595536661			Peptococcaceae_1	0.129172276440583	Bacillaceae_1_unclassified	0.000306297059139836	Bacteroidetes	7.90493	Listeriaceae	0.000965135	Deinococcaceae_unclassified	0.000482567			Planococcaceae	0.637041	Fibrobacter	0.00289564
		Peptococcaceae	0.190856191493286	Bacillus	0.00211003635388441			Peptococcaceae_2	0.0000170165032855465	Bacillus	0.00231424444683432	Chlamydiae	0.0197853	Paenibacillaceae	0.0559778	Deinococcus	0.144288			Staphylococcaceae	7.59623	Paenibacillaceae_1_unclassified	0.000482607
		Peptostreptococcaceae	9.93670571595235	Gracilibacillus	0.000136131377669962			Peptoniphilaceae	0.01245608040502	Amphibacillus	0.00895068072819743	Chloroflexi	0.118229	Planococcaceae	0.729159	Truepera	0.0313669			Thermoactinomycetaceae_1	0.000482607	Paenibacillus	0.0101347
		Ruminococcaceae	1.97068887241699	Hydrogenibacillus	0.0000170164222087452			Peptostreptococcaceae	9.9678081790844	Bacillaceae_2_unclassified	0.104855693245537			Bacilli_unclassified	0.87972	Meiothermus	0.0014477			Bacillaceae_1	0.027026	Saccharibacillus	0.00337825
		Syntrophomonadaceae	0.000187180644296197	Bacillales_unclassified	0.0373170139037783			Ruminococcaceae	1.66310794861288	Cerasibacillus	0.0000510495098566394			C178B_fa	0.000482567	Thermus	0.00241284			Bacillaceae_2	1.00575	Ammoniphilus	0.0289564
		Christensenellaceae	0.220822111002887	Exiguobacterium	0.0000510492666262356			Syntrophomonadaceae	0.000187181536141011	Gracilibacillus	0.000170165032855465			Aerococcaceae	0.583424	Elusimicrobium	0.0410182			Bacillales_Incertae_Sedis_X	0.000482607	Aneurinibacillus	0.000482607
		Clostridiaceae_1	2.64659817897056	Listeria	0.000221213488713688			Christensenellaceae	0.000136132026284372	Oceanobacillus	0.000255247549283197			Carnobacteriaceae	0.857522	FBP_ge	0.00434311			Bacillales_Incertae_Sedis_XI	0.00144782	Bhargavaea	0.00289564
		Clostridiaceae_2	0.00039137771080114	Ammoniphilus	0.000833804688228516			Clostridiaceae_1	2.60905536625641	Ornithinibacillus	0.0000680660131421858			Enterococcaceae	0.539028	Fibrobacter	0.0028954			Bacillales_Incertae_Sedis_XII	0.00337825	Chryseomicrobium	0.000482607
		Clostridiales_unclassified	0.120748531993256	Aneurinibacillus	0.0000340328444174904			Clostridiaceae_2	0.000374363072282022	Virgibacillus	0.000646627124850765			Lactobacillaceae	6.19086	possible_genus_04	0.000965135			Bacillales_incertae_sedis	0.000482607	Kurthia	0.040539
		Clostridiales_vadinBB60_group	0.0172376356974589	Brevibacillus	0.000323312021966159			Clostridiales_Incertae_Sedis_XI	0.0698357294838826	Exiguobacterium	0.0000680660131421858			Lactobacillales_unclassified	1.40138	Aliicoccus	0.193509			Bacillales_unclassified	0.667928	Lysinibacillus	0.0299216
		Defluviitaleaceae	0.00253544690910304	Paenibacillaceae_ge	0.0000340328444174904			Clostridiales_Incertae_Sedis_XII	0.000102099019713279	Hydrogenibacillus	0.0000170165032855465			Leuconostocaceae	0.0733502	Jeotgalicoccus	0.589697			Listeriaceae	0.000965214	Planococcaceae_unclassified	0.33879
		Eubacteriaceae	0.00180374075412699	Paenibacillaceae_unclassified	0.000272262755339923			Clostridiales_Incertae_Sedis_XIII	0.00425412582138661	Bacillales_unclassified	0.0663983958202023			Streptococcaceae	0.57522	Macrococcus	0.0516347			Bacilli_unclassified	0.768793	Planococcus	0.000482607
		MBA03_fa	0.0000340328444174904	Paenibacillus	0.000238229910922433			Clostridiales_unclassified	0.58245789096097	Listeria	0.000221214542712104			TSCOR001-H18_fa	0.000965135	Nosocomiicoccus	0.0284715			Aerococcaceae	0.573337	Planomicrobium	0.00337825
		Thermoanaerobacteraceae	0.0000850821110437261	Solibacillus	0.000170164222087452			Eubacteriaceae	0.00131027075298708	Bacilli_unclassified	0.443194828072057			Clostridia_unclassified	0.122572	Salinicoccus	2.46495			Carnobacteriaceae	0.534728	Sporosarcina	0.220551
		Erysipelotrichaceae	3.80031160472349	Sporosarcina	0.042609121210698			Thermoanaerobacteraceae	0.0000510495098566394	Aerococcaceae_unclassified	0.00724903039964279			Caldicoprobacteraceae	0.0014477	Staphylococcaceae_unclassified	3.44698			Enterococcaceae	0.594572	Jeotgalicoccus	1.19397
		Firmicutes_unclassified	0.221689948535533	Chungangia	0.000102098533252471			Erysipelotrichaceae	3.81795880917149	Aerococcus	0.0378276868037698			Family_XI	1.05393	Staphylococcus	0.645192			Lactobacillaceae	6.26327	Macrococcus	0.0916953
		Acidaminococcaceae	0.322069823144921	Kurthia	0.00964831139235854			Firmicutes_unclassified	0.619315637077463	Facklamia	0.18730065166401			Family_XII	0.0120642	Thermoflavimicrobium	0.000482567			Lactobacillales_unclassified	1.43576	Nosocomiicoccus	0.0164086
		Selenomonadales_unclassified	0.0000170164222087452	Lysinibacillus	0.000136131377669962			Acidaminococcaceae	0.32213942369868	Globicatella	0.00171866683184019			Family_XIII	0.482567	Amphibacillus	0.0767282			Leuconostocaceae	0.0738388	Salinicoccus	2.66496
		Veillonellaceae	0.18090158450117	Planococcaceae_unclassified	0.0187350808518285			Selenomonadales_unclassified	0.000204198039426557	Alkalibacterium	0.0272944712700165			Lachnospiraceae	7.67378	Lentibacillus	0.0313669			Streptococcaceae	0.587815	Staphylococcaceae_unclassified	2.77065
		Fusobacteriaceae	0.886368416431329	Bacilli_unclassified	0.470946501049233			Veillonellaceae	0.180868413422073	Isobaculum	0.0000340330065710929			Peptococcaceae	0.28568	Oceanobacillus	0.0139945			Clostridia_unclassified	0.279429	Staphylococcus	0.858558
		Fusobacteriales_unclassified	0.0000170164222087452	Aerococcaceae_unclassified	0.025048173491273			Fusobacteriaceae	0.886389656144115	Jeotgalibaca	0.000119115522998825			Peptostreptococcaceae	1.0713	Paucisalibacillus	0.00675594			Gracilibacteraceae	0.000482607	Thermoactinomycetaceae_1_unclassified	0.000482607
		Hydrogenedentes_fa	0.0000170164222087452	Aerococcus	0.0365002256377585			Victivallaceae	0.000595577614994126	Pisciglobus	0.0000680660131421858			Ruminococcaceae	16.6162	Pseudogracilibacillus	0.0984437			Lachnospiraceae	7.45917	Anoxybacillus	0.000965214
		Acidimicrobiales_unclassified	0.000289279177548669	Aerosphaera	0.00741916008301291			Nitrospiraceae	0.0000170165032855465	Allofustis	0.0000170165032855465			Syntrophomonadaceae	0.0188201	Virgibacillus	0.0159247			Peptococcaceae_1	0.0685302	Bacillaceae_1_unclassified	0.0154434
		Iamiaceae	0.000714689732767299	Eremococcus	0.0000340328444174904			Planctomycetaceae	0.0000680660131421858	Atopostipes	0.0439876609931376			Christensenellaceae	0.89661	Anoxybacillus	0.000482567			Peptoniphilaceae	0.211382	Bacillus	0.0101347
		Actinobacteria_unclassified	0.0512874965371581	Facklamia	0.178774531725077			Iamiaceae	0.00100397369384724	Carnobacteriaceae_unclassified	0.0181055594958214			Clostridiaceae_1	0.421764	Bacillaceae_unclassified	0.77066			Peptostreptococcaceae	1.08393	Geobacillus	0.000482607
		Micromonosporaceae	0.0067725360390806	Globicatella	0.00166760937645703			Actinobacteria_unclassified	0.0310551184961223	Carnobacterium	0.000221214542712104			Clostridiaceae_2	0.0101339	Bacillus	0.00482567			Ruminococcaceae	11.1617	Amphibacillus	0.0762519
		Nocardioidaceae	0.00365853077488022	Ignavigranum	0.000153147799878707			Actinomycetaceae	0.115184710739864	Catellicoccus	0.0000510495098566394			Clostridiaceae_3	0.0028954	Caldalkalibacillus	0.000482567			Syntrophomonadaceae	0.0188217	Bacillaceae_2_unclassified	0.877379
		Propionibacteriaceae	0.00558138648446843	Alkalibacterium	0.0267498157121475			Dermabacteraceae	2.50054112480448	Desemzia	0.000170165032855465			Clostridiales_unclassified	1.3647	Cerasibacillus	0.000482567			Christensenellaceae	0.00482607	Cerasibacillus	0.000482607
		Propionibacteriales_unclassified	0.000136131377669962	Lacticigenium	0.0000680656888349809			Dermacoccaceae	0.000102099019713279	Enterococcaceae_unclassified	0.0404652448130295			Clostridiales_vadinBB60_group	0.533237	Geobacillus	0.000482567			Clostridiaceae_1	0.37402	Gracilibacillus	0.00627389
		Pseudonocardiaceae	0.00081678826601977	Pisciglobus	0.0000680656888349809			Dietziaceae	0.565271222642568	Enterococcus	7.54057415043406			Defluviitaleaceae	0.0361925	Gracilibacillus	0.00434311			Clostridiaceae_2	0.0101347	Lentibacillus	0.0067565
		Streptomycetaceae	0.00364151435267148	Trichococcus	0.0443788291204075			Geodermatophilaceae	0.0000340330065710929	Vagococcus	0.000459445588709754			Eubacteriaceae	0.0415008	Bacillales_unclassified	0.415008			Clostridiales_Incertae_Sedis_XI	0.578163	Oceanobacillus	0.00916953
		Nocardiopsaceae	0.0573963921100976	Allofustis	0.0000170164222087452			Glycomycetaceae	0.00929101079390836	Lactobacillaceae_unclassified	0.187692031239577			ODP1230B8.23	0.0014477	Thermicanus	0.000482567			Clostridiales_Incertae_Sedis_XII	0.0115826	Ornithinibacillus	0.00482607
		Streptosporangiales_unclassified	0.0000340328444174904	Alloiococcus	0.00527509088471102			Intrasporangiaceae	0.0447704201442727	Lactobacillus	27.375248611113			M55-D21_fa	0.0014477	Gemella	0.0014477			Clostridiales_Incertae_Sedis_XIII	0.0497085	Virgibacillus	0.0246129
		Actinomycetaceae	0.113040092732694	Atopostipes	0.0434599423211353			Jonesiaceae	0.000646627124850765	Pediococcus	0.000663643628136312			MBA03_fa	0.00337797	Exiguobacterium	0.00337797			Clostridiales_unclassified	6.83275	Thermicanus	0.000482607
		Actinopolysporaceae	0.0000170164222087452	Carnobacteriaceae_unclassified	0.0154338949433319			Kineosporiaceae	0.0000510495098566394	Lactobacillales_unclassified	1.32340749352352			Thermoanaerobacteraceae	0.00241284	Listeria	0.000965135			Eubacteriaceae	0.0304042	Gemella	0.00144782
		Bifidobacteriaceae	0.777395248606525	Carnobacterium	0.000136131377669962			Microbacteriaceae	0.0641522173865101	Fructobacillus	0.0000170165032855465			Erysipelotrichaceae	1.87912	Ammoniphilus	0.028954			Erysipelotrichaceae	1.69733	Exiguobacterium	0.00337825
		Corynebacteriaceae	4.97129669901829	Desemzia	0.000170164222087452			Actinomycetales_unclassified	0.342065749046055	Leuconostoc	0.00141236977270036			Firmicutes_unclassified	0.597418	Aneurinibacillus	0.000965135			Firmicutes_unclassified	2.66254	Caldalkalibacillus	0.000482607
		Corynebacteriales_Incertae_Sedis	0.000119114955461217	Catellicoccus	0.000884853954854751			Micrococcaceae	1.6407142302891	Weissella	0.00491776944952292			Acidaminococcaceae	0.121124	Paenibacillaceae_ge	0.00337797			Acidaminococcaceae	0.121134	Bacillales_unclassified	0.667928
		Corynebacteriales_unclassified	0.0756209802956637	Enterococcaceae_unclassified	0.0654621762370428			Micromonosporaceae	0.0000680660131421858	Lactococcus	0.000850825164277323			Veillonellaceae	0.1467	Paenibacillaceae_unclassified	0.00723851			Selenomonadales_unclassified	0.000482607	Listeria	0.000965214
		Dietziaceae	0.558955436712863	Enterococcus	7.49820136417254			Mycobacteriaceae	0.0000510495098566394	Streptococcaceae_unclassified	0.00633013922222328			Fusobacteriaceae	0.100857	Paenibacillus	0.0106165			Veillonellaceae	0.149126	Bacilli_unclassified	0.768793
		Mycobacteriaceae	0.0000510492666262356	Melissococcus	0.000306295599757414			Nakamurellaceae	0.0000340330065710929	Streptococcus	12.9209372417746			Leptotrichiaceae	0.00241284	Saccharibacillus	0.00337797			Fusobacteriaceae	0.100865	Abiotrophia	0.000965214
		Nocardiaceae	0.0012421988212384	Vagococcus	0.000340328444174904			Nocardiaceae	0.00124220473984489	Clostridia_unclassified	0.0191775992028109			AKAU4049_fa	0.000482567	Bhargavaea	0.0028954			Leptotrichiaceae	0.00241303	Aerococcaceae_unclassified	0.222482
		Geodermatophilaceae	0.00039137771080114	Lactobacillaceae_unclassified	0.0578047862431075			Nocardioidaceae	0.00365854820639249	Catabacter	0.0000170165032855465			BD2-11_terrestrial_group_fa	0.000482567	Psychrobacillus	0.0028954			Gemmatimonadaceae	0.00482607	Aerococcus	0.058878
		Nakamurellaceae	0.0000340328444174904	Lactobacillus	27.4653222331808			Nocardiopsaceae	0.0569372199934384	Acetitomaculum	0.0000340330065710929			Gemmatimonadaceae	0.00820364	Solibacillus	0.0130293			Victivallaceae	0.099417	Facklamia	0.25916
		Glycomycetaceae	0.00260351259793802	Pediococcus	0.000476459821844866			Promicromonosporaceae	0.0000170165032855465	Dorea	0.0286387750295747			Longimicrobiaceae	0.00482567	Sporosarcina	0.183858			Oligosphaeraceae	0.000482607	Globicatella	0.0318521
		Kineosporiaceae	0.0000510492666262356	Lactobacillales_unclassified	1.55368442976948			Propionibacteriaceae	0.00566649559408697	Lachnospiraceae_unclassified	2.63012179732392			S0134_terrestrial_group_fa	0.0014477	Chryseomicrobium	0.000482567			Nitrospiraceae	0.00144782	Alkalibacterium	0.0395738
		Beutenbergiaceae	0.000102098533252471	Leuconostoc	0.00132728093228213			Pseudonocardiaceae	0.000850825164277323	Roseburia	0.00023823104599765			Acidimicrobiaceae	0.00337797	Domibacillus	0.000482567			Parcubacteria_unclassified	0.000482607	Jeotgalibaca	0.00241303
		Jonesiaceae	0.000595574777306083	Leuconostocaceae_ge	0.000221213488713688			Beutenbergiaceae	0.0000170165032855465	Ruminococcus2	0.0271072897338755			Acidimicrobiales_Incertae_Sedis	0.0028954	Kurthia	0.046809			Planctomycetes_unclassified	0.00193043	Pisciglobus	0.0072391
		Microbacteriaceae	0.0641859445713869	Leuconostocaceae_unclassified	0.000153147799878707			Ruaniaceae	0.000748726144564044	Anaerosporobacter	0.000867841667562869			Acidimicrobiales_unclassified	0.00579081	Lysinibacillus	0.00675594			Planctomycetaceae	0.0260608	Allofustis	0.00868692
		Micrococcaceae	1.63689473437025	Weissella	0.00476459821844866			Sanguibacteraceae	0.000833808660991776	Anaerostipes	0.0101928854680423			Iamiaceae	0.00386054	Planococcaceae_unclassified	0.446375			Acidimicrobiaceae	0.00289564	Atopostipes	0.188699
		Micrococcales_unclassified	0.218592959693541	Lactococcus	0.000561541932888592			Streptomycetaceae	0.00364153170310694	Blautia	0.216041525713298			OM1_clade	0.000965135	Planococcus	0.00193027			Acidimicrobiales_unclassified	0.00289564	Carnobacteriaceae_unclassified	0.248543
		Promicromonosporaceae	0.0000170164222087452	Streptococcaceae_unclassified	0.0218490861160289			Bogoriellaceae	0.00519003350209167	Cellulosilyticum	0.0464210209629707			Actinobacteria_unclassified	0.21812	Planomicrobium	0.0236458			Iamiaceae	0.00579128	Carnobacterium	0.0246129
		Ruaniaceae	0.00374361288592395	Streptococcus	12.7906489995365			Brevibacteriaceae	1.04886322951451	Clostridium_XlVa	0.00503688497252175			Micromonosporaceae	0.0294366	Bacilli_unclassified	0.87972			Actinobacteria_unclassified	0.0183391	Desemzia	0.013513
		Sanguibacteraceae	0.000833804688228516	TSCOR001-H18_ge	0.0000510492666262356			Corynebacteriaceae	4.96180816002592	Clostridium_XlVb	0.0362281354949284			Nocardioidaceae	0.0945832	C178B_ge	0.000482567			Actinomycetaceae	0.273155	Dolosigranulum	0.000482607
		Bogoriellaceae	0.00042541055521863	Clostridia_unclassified	0.00741916008301291			Corynebacterineae_incertae_sedis	0.000153148529569918	Coprococcus	0.0000510495098566394			Propionibacteriaceae	0.0994089	Abiotrophia	0.000965135			Demequinaceae	0.000965214	Granulicatella	0.000965214
		Brevibacteriaceae	1.03914185502144	Anaerococcus	0.00163357653203954			Bifidobacteriaceae	0.777432985606761	Desulfitibacter	0.0000510495098566394			Propionibacteriales_unclassified	0.00193027	Aerococcaceae_unclassified	0.133671			Dermabacteraceae	7.79458	Enterococcaceae_unclassified	0.0665997
		Demequinaceae	0.0200963946285281	Murdochiella	0.00884853954854751			Coriobacteriaceae	0.762441446212194	Peptococcaceae_1_unclassified	0.0000680660131421858			Pseudonocardiaceae	0.0120642	Aerococcus	0.03571			Dermacoccaceae	0.0197869	Enterococcus	0.359059
		Dermabacteraceae	2.49244641018154	Peptoniphilus	0.0111287401245194			Nitriliruptoraceae	0.0000340330065710929	Peptococcus	0.129053160917584			Streptomycetaceae	0.0241284	Aerosphaera	0.0236458			Dietziaceae	0.183873	Tetragenococcus	0.00193043
		Dermacoccaceae	0.000238229910922433	Tepidimicrobium	0.0000170164222087452			Patulibacteraceae	0.0000680660131421858	Peptococcaceae_2_unclassified	0.0000170165032855465			Nocardiopsaceae	0.388949	Facklamia	0.326698			Geodermatophilaceae	0.0106174	Vagococcus	0.166982
		Dermatophilaceae	0.0000510492666262356	Tissierella	0.00331820233070532			Solirubrobacteraceae	0.0000340330065710929	Peptoniphilaceae_unclassified	0.000612594118279672			Streptosporangiaceae	0.000482567	Globicatella	0.0313669			Glycomycetaceae	0.0463303	Lactobacillaceae_unclassified	0.568993
		Intrasporangiaceae	0.0439534185651889	Anaerosalibacter	0.0000340328444174904			Actinobacteria_unclassified	0.00141236977270036	Peptoniphilus	0.0118434862867403			Streptosporangiales_unclassified	0.000482567	Ignavigranum	0.0313669			Intrasporangiaceae	0.191595	Lactobacillus	5.68607
		Actinobacteria_unclassified	0.0309018227310813	Family_XI_ge	0.000153147799878707			Alphaproteobacteria_unclassified	0.000204198039426557	Clostridium_XI	0.000119115522998825			Actinomycetaceae	0.260104	Alkalibacterium	0.0328146			Jonesiaceae	0.00579128	Pediococcus	0.00820432
		Coriobacteriaceae	0.764888178283097	Family_XI_unclassified	0.0083550633044939			Caulobacteraceae	0.0000170165032855465	Peptostreptococcaceae_unclassified	0.18512253924346			Bifidobacteriaceae	0.150561	Lacticigenium	0.00193027			Kineosporiaceae	0.0111	Lactobacillales_unclassified	1.43576
		MB-A2-108_fa	0.0000170164222087452	Gallicola	0.0486499510948026			Aurantimonadaceae	0.000102099019713279	Peptostreptococcus	0.0650030425507875			Corynebacteriaceae	7.23079	Pisciglobus	0.00530824			Microbacteriaceae	0.564167	Leuconostoc	0.0120652
		Nitriliruptoraceae	0.0000340328444174904	Gottschalkia	0.0185479002075323			Rhizobiales_unclassified	0.000255247549283197	Romboutsia	8.73513268107942			Corynebacteriales_Incertae_Sedis	0.000965135	Trichococcus	0.114851			Actinomycetales_unclassified	1.27553	Weissella	0.0617737
		Elev-16S-1332	0.0000510492666262356	Helcococcus	0.00809981697136272			Bradyrhizobiaceae	0.0000170165032855465	Terrisporobacter	0.982430800687739			Corynebacteriales_unclassified	0.224394	Allofustis	0.00868621			Micrococcaceae	1.96276	Lactococcus	0.0183391
		Patulibacteraceae	0.000119114955461217	Family_XIII_AD3011_group	0.0044412861964825			Brucellaceae	0.00171866683184019	Acetanaerobacterium	0.0000680660131421858			Dietziaceae	0.156352	Alloiococcus	0.12788			Micromonosporaceae	0.00289564	Streptococcaceae_unclassified	0.000965214
		Solirubrobacteraceae	0.0000340328444174904	Family_XIII_UCG-001	0.00326715306407908			Hyphomicrobiaceae	0.000697676634707405	Flavonifractor	0.00185479885812456			Mycobacteriaceae	0.014477	Atopostipes	0.205091			Mycobacteriaceae	0.0144782	Streptococcus	0.568511
		TM146	0.0000170164222087452	Family_XIII_ge	0.0260691588237977			Methylobacteriaceae	0.00023823104599765	Hydrogenoanaerobacterium	0.000136132026284372			Nocardiaceae	0.0207504	Carnobacteriaceae_unclassified	0.323803			Nakamurellaceae	0.00434346	Clostridia_unclassified	0.279429
		Victivallaceae	0.000612591199514828	Family_XIII_unclassified	0.0246908286248893			Phyllobacteriaceae	0.000187181536141011	Intestinimonas	0.0771358093933821			Frankiaceae	0.0014477	Carnobacterium	0.0183376			Nocardiaceae	0.0207521	Gracilibacter	0.000482607
		Victivallales_unclassified	0.000221213488713688	Eisenbergiella	0.0284004086663958			Rhizobiaceae	0.000442429085424208	Oscillibacter	0.0312082670256922			Frankiales_unclassified	0.000482567	Desemzia	0.0154422			Nocardioidaceae	0.0936257	Dorea	0.0748041
		vadinBE97	0.000221213488713688	Epulopiscium	0.0252183377133604			Rhodobacteraceae	0.00268860751911634	Papillibacter	0.0000340330065710929			Geodermatophilaceae	0.017855	Dolosigranulum	0.000482567			Nocardiopsaceae	0.386085	Lachnoanaerobaculum	0.00144782
		Nitrospiraceae	0.0000170164222087452	Fusicatenibacter	0.0763867192950573			Rhodospirillaceae	0.000102099019713279	Pseudoflavonifractor	0.11133898099733			Nakamurellaceae	0.00482567	Granulicatella	0.00193027			Promicromonosporaceae	0.00337825	Lachnospiraceae_unclassified	6.53015
		Planctomycetaceae	0.0000680656888349809	Lachnoclostridium	0.012285856834714			Rhodospirillales_unclassified	0.0000340330065710929	Ruminococcaceae_unclassified	1.12559064282904			Sporichthyaceae	0.00193027	Enterococcaceae_unclassified	0.0583906			Propionibacteriaceae	0.0984518	Mobilitalea	0.00193043
		Alphaproteobacteria_unclassified	0.00081678826601977	Lachnoclostridium_5	0.0000340328444174904			Erythrobacteraceae	0.000102099019713279	Ruminococcus	0.00495180245609402			Glycomycetaceae	0.0183376	Enterococcus	0.312221			Pseudonocardiaceae	0.0120652	Oribacterium	0.000965214
		Caulobacteraceae	0.0000170164222087452	Anaerosporobacter	0.196284430177876			Sphingomonadaceae	0.000119115522998825	Sporobacter	0.00100397369384724			Kineosporiaceae	0.00965135	Tetragenococcus	0.00193027			Ruaniaceae	0.0072391	Roseburia	0.0304042
		Aurantimonadaceae	0.000119114955461217	Lachnospiraceae_FCS020_group	0.000442426977427376			Betaproteobacteria_unclassified	0.000714693137992951	Subdoligranulum	0.0363642675212128			Beutenbergiaceae	0.00579081	Vagococcus	0.166486			Sanguibacteraceae	0.00289564	Ruminococcus2	0.0583954
		Phyllobacteriaceae	0.000255246333131178	Lachnospiraceae_NC2004_group	0.000544525510679847			Alcaligenaceae	0.0220193552514971	Anaerofilum	0.00233126095011986			Jonesiaceae	0.00579081	Lactobacillaceae_unclassified	0.0525998			Streptomycetaceae	0.0241303	Stomatobaculum	0.000482607
		Rhizobiaceae	0.000442426977427376	Lachnospiraceae_NK3A20_group	0.0000170164222087452			Burkholderiales_unclassified	0.0135281201120094	Anaerotruncus	0.000561544608423033			Microbacteriaceae	0.572325	Lactobacillus	6.13005			Streptosporangiaceae	0.000482607	Anaerosporobacter	0.00434346
		Rhizobiales_unclassified	0.000102098533252471	Lachnospiraceae_NK4A136_group	0.000136131377669962			Comamonadaceae	0.000629610621565219	Butyricicoccus	0.0963134085961929			Micrococcaceae	1.96743	Pediococcus	0.00820364			Bogoriellaceae	0.0284738	Anaerostipes	0.0332999
		Bradyrhizobiaceae	0.0000170164222087452	Lachnospiraceae_UCG-002	0.000459443399636121			Oxalobacteraceae	0.000969940687276148	Clostridium_III	0.000323313562425383			Micrococcales_Incertae_Sedis	0.00193027	Lactobacillales_unclassified	1.40138			Brevibacteriaceae	0.919366	Blautia	0.268329
		Brucellaceae	0.00178672433191825	Lachnospiraceae_UCG-010	0.00175269148750076			Sutterellaceae	0.0599491410749802	Clostridium_IV	0.0457233443282633			Micrococcales_unclassified	0.781759	Leuconostoc	0.00916878			Cellulomonadaceae	0.00965214	Butyrivibrio	0.000482607
		Hyphomicrobiaceae	0.000680656888349809	Anaerostipes	0.00986952488107222			Neisseriaceae	0.000187181536141011	Faecalibacterium	0.127589741635027			Promicromonosporaceae	0.00337797	Leuconostocaceae_unclassified	0.00386054			Corynebacteriaceae	7.2087	Cellulosilyticum	0.0139956
		Methylobacteriaceae	0.000204197066504943	Lachnospiraceae_ge	0.000272262755339923			Nitrosomonadaceae	0.0000850825164277323	Fastidiosipila	0.000578561111708579			Ruaniaceae	0.0183376	Weissella	0.0603209			Corynebacterineae_incertae_sedis	0.000965214	Clostridium_XlVa	0.0289564
		Rhodobacteraceae	0.00268859470898174	Lachnospiraceae_unclassified	2.39562296781378			Rhodocyclaceae	0.000969940687276148	Syntrophomonadaceae_unclassified	0.000187181536141011			Sanguibacteraceae	0.00579081	Lactococcus	0.00916878			Cryptosporangiaceae	0.00144782	Clostridium_XlVb	0.401529
		Rhodospirillaceae	0.000442426977427376	Marvinbryantia	0.00767440641614409			Bradymonadaceae	0.0000680660131421858	Christensenella	0.000136132026284372			Bogoriellaceae	0.0168899	Streptococcaceae_unclassified	0.0318494			Bifidobacteriaceae	0.150573	Coprococcus	0.00965214
		Rhodospirillales_unclassified	0.0000510492666262356	Mobilitalea	0.000119114955461217			Deltaproteobacteria_unclassified	0.00023823104599765	Anaerobacter	0.0000170165032855465			Brevibacteriaceae	0.885511	Streptococcus	0.534202			Coriobacteriaceae	1.76296	Desulfosporosinus	0.000482607
		Mitochondria	0.0000170164222087452	Roseburia	0.000323312021966159			Desulfovibrionaceae	0.228140259549321	Clostridiaceae_1_unclassified	0.0256608869546041			Cellulomonadaceae	0.00482567	TSCOR001-H18_ge	0.000965135			Gaiellaceae	0.00482607	Peptococcaceae_1_unclassified	0.000965214
		Erythrobacteraceae	0.000102098533252471	Sellimonas	0.0849459796660561			Desulfovibrionales_unclassified	0.0255758044381763	Clostridium_sensu_stricto	2.58329238028209			Demequinaceae	0.0622512	Clostridia_unclassified	0.122572			Nitriliruptoraceae	0.00434346	Peptococcus	0.0670824
		Sphingomonadaceae	0.0000850821110437261	Shuttleworthia	0.00180374075412699			Campylobacteraceae	0.00023823104599765	Hathewaya	0.0000340330065710929			Dermabacteraceae	7.78236	Caldicoprobacter	0.0014477			Conexibacteraceae	0.000482607	Peptoniphilaceae_unclassified	0.0164086
		Sphingomonadales_unclassified	0.0000340328444174904	Blautia	0.160209615095336			Helicobacteraceae	0.0167612557362633	Proteiniclasticum	0.0000510495098566394			Dermacoccaceae	0.0231632	Anaerococcus	0.0762456			Patulibacteraceae	0.00627389	Peptoniphilus	0.194973
		Betaproteobacteria_unclassified	0.000272262755339923	Tyzzerella	0.0127793330787677			Aeromonadaceae	0.0901364179035396	Alkaliphilus	0.000323313562425383			Dermatophilaceae	0.0120642	Murdochiella	0.0159247			Solirubrobacteraceae	0.00386085	Clostridium_XI	0.00337825
		Alcaligenaceae	0.0946453403250409	Tyzzerella_3	0.00580259997318212			Succinivibrionaceae	0.000918891177419508	Clostridiaceae_2_unclassified	0.0000510495098566394			Intrasporangiaceae	0.195922	Parvimonas	0.00193027			Solirubrobacterales_unclassified	0.00386085	Filifactor	0.000482607
		Burkholderiales_unclassified	0.00127623166565589	Cellulosilyticum	0.0465739475853357			Halomonadaceae	0.00827002059677558	Anaerococcus	0.00163358431541246			Actinobacteria_unclassified	0.0299192	Peptoniphilus	0.167933			Actinobacteria_unclassified	0.0101347	Intestinibacter	0.00144782
		Comamonadaceae	0.000629607621723573	Coprococcus_1	0.0410265939452847			Oceanospirillaceae	0.0000340330065710929	Tepidimicrobium	0.0000170165032855465			Coriobacteriaceae	1.79081	Sedimentibacter	0.00386054			Thermoleophilaceae	0.000482607	Peptostreptococcaceae_unclassified	0.117756
		Oxalobacteraceae	0.000969936065898477	Cryptanaerobacter	0.0000170164222087452			Oceanospirillales_incertae_sedis	0.0000340330065710929	Tissierella	0.00519003350209167			Nitriliruptoraceae	0.00434311	Tepidimicrobium	0.00241284			Geminicoccus	0.00144782	Peptostreptococcus	0.0279912
		Neisseriaceae	0.000187180644296197	Desulfitibacter	0.0000170164222087452			Pasteurellaceae	1.60785536244471	Anaerosalibacter	0.0000340330065710929			Gaiellaceae	0.00193027	Tissierella	0.0694897			Alphaproteobacteria_unclassified	0.105208	Romboutsia	0.869175
		Rhodocyclaceae	0.0010550181769422	Peptococcaceae_unclassified	0.00190583928737946			Moraxellaceae	0.301226141160743	Clostridiales_Incertae_Sedis_XI_unclassified	0.00770847598835254			Gaiellales_unclassified	0.0014477	Anaerosalibacter	0.00241284			Caulobacteraceae	0.121617	Terrisporobacter	0.0637041
		Bdellovibrionaceae	0.0000340328444174904	Peptococcus	0.183283883610395			Pseudomonadaceae	0.0324504717655371	Clostridium_XII	0.0000170165032855465			Elev-16S-1332	0.00193027	Ezakiella	0.00627337			Aurantimonadaceae	0.0101347	Acetanaerobacterium	0.00241303
		Bradymonadaceae	0.0000850821110437261	Asaccharospora	0.000306295599757414			Pseudomonadales_unclassified	0.0000170165032855465	Ezakiella	0.000119115522998825			Patulibacteraceae	0.00675594	Family_XI_ge	0.0028954			Rhizobiales_unclassified	0.029439	Flavonifractor	0.133682
		Deltaproteobacteria_unclassified	0.00646624043932318	Romboutsia	0.106624901559998			Piscirickettsiaceae	0.000170165032855465	Gallicola	0.0485991333835207			Solirubrobacteraceae	0.00434311	Family_XI_unclassified	0.303535			Xanthobacteraceae	0.000965214	Hydrogenoanaerobacterium	0.0144782
		Desulfovibrionaceae	0.256012072130572	Terrisporobacter	0.940837983921523			Xanthomonadaceae	0.0269030916944489	Helcococcus	0.00651732075836429			Solirubrobacterales_unclassified	0.0014477	Finegoldia	0.00193027			Beijerinckiaceae	0.00289564	Intestinimonas	0.0709432
		Desulfovibrionales_unclassified	0.0000680656888349809	Intestinibacter	0.0535336642687124			Alteromonadaceae	0.0000680660131421858	Clostridiales_Incertae_Sedis_XII_unclassified	0.0000170165032855465			TM146	0.00434311	Gallicola	0.0415008			Bradyrhizobiaceae	0.0139956	Oscillibacter	0.451237
		Sandaracinaceae	0.0000170164222087452	Paeniclostridium	0.000119114955461217			Idiomarinaceae	0.000323313562425383	Guggenheimella	0.0000850825164277323			YNPFFP1	0.000482567	Gottschalkia	0.231632			Brucellaceae	0.121134	Papillibacter	0.00530868
		Myxococcales_unclassified	0.0000170164222087452	Peptostreptococcaceae_unclassified	8.77053626914262			Enterobacteriaceae	1.85527532021656	Clostridiales_Incertae_Sedis_XIII_unclassified	0.00348838317353702			Thermoleophilia_unclassified	0.0014477	Helcococcus	0.0690071			Hyphomicrobiaceae	0.0439172	Pseudoflavonifractor	0.34989
		Campylobacteraceae	0.000238229910922433	Peptostreptococcus	0.0647474865042755			Gammaproteobacteria_unclassified	0.003114020101255	Mogibacterium	0.00076574264784959			Thermoleophilaceae	0.000482567	Guggenheimella	0.0120642			Methylobacteriaceae	0.0308868	Ruminococcaceae_unclassified	7.82064
		Helicobacteraceae	0.016761175875614	Flavonifractor	0.0178502268969737			Proteobacteria_unclassified	0.010992661122463	Clostridiales_unclassified	0.58245789096097			IheB3-7	0.000482567	Family_XIII_AD3011_group	0.0521173			Methylocystaceae	0.000482607	Ruminococcus	0.12403
		Gammaproteobacteria_unclassified	0.00529210730691976	Hydrogenoanaerobacterium	0.0000510492666262356			Brachyspiraceae	0.0000170165032855465	Alkalibaculum	0.0000680660131421858			Lentisphaerae_unclassified	0.000482567	Family_XIII_UCG-001	0.0260586			Phyllobacteriaceae	0.0347477	Sporobacter	0.114378
		Halomonadaceae	0.00826998119345018	Intestinimonas	0.0000680656888349809			Spirochaetaceae	0.000544528105137486	Anaerofustis	0.0012081717332738			Victivallaceae	0.0994089	Family_XIII_ge	0.0463265			Rhizobiaceae	0.0164086	Subdoligranulum	0.676615
		Oceanospirillaceae	0.000238229910922433	Oscillibacter	0.0232614491593547			Synergistaceae	0.0865799687168604	Eubacteriaceae_unclassified	0.0000170165032855465			Victivallales_unclassified	0.00868621	Family_XIII_unclassified	0.350826			Rhodobacteraceae	0.245647	Anaerofilum	0.0347477
		Pasteurellaceae	1.60783068523771	Oscillospira	0.0017697079097095			Acholeplasmataceae	0.0000850825164277323	Eubacterium	0.0000170165032855465			vadinBE97	0.0395705	Mogibacterium	0.00434311			Acetobacteraceae	0.0361955	Anaerotruncus	0.0767345
		Moraxellaceae	0.301122607405955	Pseudoflavonifractor	0.00279069324223422			Mollicutes_unclassified	0.0000170165032855465	Syntrophaceticus	0.0000510495098566394			Oligosphaeraceae	0.000482567	Acetitomaculum	0.0028954			Rhodospirillaceae	0.0125478	Butyricicoccus	0.410698
		Pseudomonadaceae	0.0298468045541391	Ruminiclostridium	0.00626204337281824			Mycoplasmataceae	0.0453489812559813	Holdemania	0.00304595408811282			Nitrospiraceae	0.0014477	Eisenbergiella	0.102787			Rhodospirillales_unclassified	0.00241303	Clostridium_III	0.0111
		Piscirickettsiaceae	0.000170164222087452	Ruminiclostridium_5	0.116664590663157			Opitutae_unclassified	0.000799775654420683	Turicibacter	3.07677097556294			Candidatus_Falkowbacteria_fa	0.000482567	Epulopiscium	0.0497044			Rickettsiaceae	0.000965214	Clostridium_IV	0.360025
		Xanthomonadaceae	0.0268178814009825	Ruminiclostridium_9	0.0358025523271999			Puniceicoccaceae	0.000102099019713279	Clostridium_XVIII	0.221537856274529			Parcubacteria_fa	0.000482567	Fusicatenibacter	0.0139945			Erythrobacteraceae	0.0250956	Ercella	0.000482607
		Aeromonadaceae	0.0901530048619321	Anaerofilum	0.00738512723859542			Subdivision5_unclassified	0.000476462091995301	Coprobacillus	0.0000850825164277323			OM190_fa	0.000482567	Hungatella	0.000482567			Sphingomonadaceae	0.219586	Faecalibacterium	0.478746
		Succinivibrionaceae	0.000901870377063496	Ruminococcaceae_NK4A214_group	0.0130345794118988			Verrucomicrobiaceae	0.0592004149304161	Eggerthia	0.0000170165032855465			Phycisphaerae_unclassified	0.000482567	Lachnoanaerobaculum	0.0014477			Sphingomonadales_unclassified	0.00868692	Fastidiosipila	0.0255782
		Alteromonadaceae	0.0000680656888349809	Ruminococcaceae_UCG-002	0.00183777359854448			Bacteria_unclassified	0.421107406807418	Erysipelothrix	0.0119626018097392			Phycisphaeraceae	0.0014477	Lachnoclostridium	0.0376402			Betaproteobacteria_unclassified	0.0704606	Syntrophomonadaceae_unclassified	0.0188217
		Idiomarinaceae	0.000323312021966159	Ruminococcaceae_UCG-004	0.0740214366080417			Bacteroidetes_unclassified	0.814290731723254	Erysipelotrichaceae_unclassified	0.231288312657147			Tepidisphaeraceae	0.00434311	Lachnoclostridium_10	0.00193027			Alcaligenaceae	0.296321	Christensenella	0.00482607
		Cellvibrionaceae	0.00035734486638365	Ruminococcaceae_UCG-005	0.19026061671598			Bacteroidaceae	1.37443998687687	Faecalicoccus	0.199365352493462			Planctomycetaceae	0.0299192	Lachnoclostridium_12	0.000965135			Burkholderiaceae	0.0164086	Clostridiaceae_1_unclassified	0.107621
		Porticoccaceae	0.0000340328444174904	Ruminococcaceae_UCG-007	0.000119114955461217			Bacteroidales_unclassified	1.22159775436609	Faecalitalea	0.0738856572658427			Planctomycetes_unclassified	0.000965135	Lachnospira	0.00337797			Burkholderiales_incertae_sedis	0.027026	Clostridium_sensu_stricto	0.251438
		Enterobacteriaceae	1.85484107001985	Ruminococcaceae_UCG-008	0.0690696577452968			Porphyromonadaceae	0.555265518710666	Firmicutes_unclassified	0.619315637077463			Alphaproteobacteria_Incertae_Sedis_unclassified	0.0014477	Anaerosporobacter	0.0308843			Burkholderiales_unclassified	0.0796301	Hathewaya	0.00337825
		Proteobacteria_unclassified	0.00265456186456425	Ruminococcaceae_UCG-009	0.0216789218939414			Prevotellaceae	0.221946252353382	Acidaminococcaceae_unclassified	0.319859212258417			Alphaproteobacteria_unclassified	0.148631	Lachnospiraceae_FCS020_group	0.014477			Comamonadaceae	0.143817	Proteiniclasticum	0.0106174
		Saccharibacteria_fa	0.00561541932888592	Ruminococcaceae_UCG-010	0.00896765450400873			Rikenellaceae	0.209490171948362	Phascolarctobacterium	0.00228021144026322			Caulobacteraceae	0.12209	Lachnospiraceae_NC2004_group	0.0328146			Oxalobacteraceae	0.0728736	Youngiibacter	0.000965214
		Brachyspiraceae	0.0000170164222087452	Ruminococcaceae_UCG-013	0.0506749053376433			Cyclobacteriaceae	0.000408396078853115	Selenomonadales_unclassified	0.000204198039426557			Hyphomonadaceae	0.000482567	Lachnospiraceae_NK3A20_group	0.0014477			Sutterellaceae	0.305008	Alkaliphilus	0.00965214
		Spirochaetaceae	0.000748722577184789	Anaerotruncus	0.0585194759758748			Cryomorphaceae	0.0000170165032855465	Megamonas	0.0469995820746793			Aurantimonadaceae	0.00965135	Lachnospiraceae_NK4A136_group	0.0028954			Hydrogenophilaceae	0.0101347	Natronincola	0.000482607
		Synergistaceae	0.0868858517978531	Ruminococcaceae_UCG-014	0.181973619100321			Flavobacteriaceae	0.0210664310675065	Megasphaera	0.0226319493697768			Phyllobacteriaceae	0.0371577	Lachnospiraceae_NK4B4_group	0.0028954			Methylophilaceae	0.00337825	Anaerococcus	0.0762519
		Acholeplasmataceae	0.0000170164222087452	Ruminococcaceae_V9D2013_group	0.000136131377669962			Chitinophagaceae	0.000136132026284372	Veillonella	0.10992661122463			Rhizobiaceae	0.0139945	Lachnospiraceae_UCG-001	0.000482567			Neisseriaceae	0.0236477	Parvimonas	0.00241303
		Mollicutes_RF9_fa	0.200555552152271	Ruminococcaceae_ge	0.0182245881855661			Sphingobacteriaceae	0.0123029318754501	Veillonellaceae_unclassified	0.00131027075298708			Rhizobiales_Incertae_Sedis	0.00530824	Lachnospiraceae_UCG-002	0.0106165			Nitrosomonadaceae	0.0067565	Sedimentibacter	0.00386085
		Mollicutes_unclassified	0.000476459821844866	Ruminococcaceae_unclassified	0.610276966094438			Sphingobacteriales_unclassified	0.00158253480555582	Fusobacteriaceae_unclassified	0.000119115522998825			Rhizobiales_unclassified	0.0221981	Lachnospiraceae_UCG-003	0.000482567			Rhodocyclaceae	0.0347477	Sporanaerobacter	0.00144782
		Mycoplasmataceae	0.0455019129861847	Ruminococcus_1	0.00245036479805931			Candidatus_Saccharibacteria_unclassified	0.00893366422491189	Fusobacterium	0.886270540621116			Xanthobacteraceae	0.00193027	Lachnospiraceae_UCG-004	0.000965135			Bacteriovoracaceae	0.00772171	Tepidimicrobium	0.000965214
		NB1-n_fa	0.000102098533252471	Ruminococcus_2	0.00483266390728364			Chlamydiaceae	0.00228021144026322	Victivallis	0.000595577614994126			Bartonellaceae	0.00193027	Lachnospiraceae_UCG-010	0.093618			Bdellovibrionaceae	0.0130304	Tissierella	0.167465
		Opitutae_unclassified	0.000119114955461217	Sporobacter	0.0000850821110437261			Caldilineaceae	0.0000170165032855465	Nitrospira	0.0000170165032855465			Beijerinckiaceae	0.00193027	Anaerostipes	0.0328146			Bradymonadaceae	0.0188217	Anaerosalibacter	0.000965214
		Opitutae_vadinHA64_fa	0.00081678826601977	Subdoligranulum	0.191145470670835			Chloroflexi_unclassified	0.0144980607992856	Planctomycetaceae_unclassified	0.0000170165032855465			Bradyrhizobiaceae	0.0139945	Lachnospiraceae_XPB1014_group	0.00193027			Deltaproteobacteria_unclassified	0.00289564	Clostridiales_Incertae_Sedis_XI_unclassified	0.22393
		Verrucomicrobiaceae	0.0592001328642246	Butyricicoccus	0.0893192001737036			Sphaerobacteraceae	0.0024163434665476	Rhodopirellula	0.0000510495098566394			Brucellaceae	0.123055	Lachnospiraceae_ge	0.00675594			Desulfovibrionaceae	0.472955	Ezakiella	0.00772171
		WCHB1-41_fa	0.000663640466141063	Candidatus_Soleaferrea	0.000680656888349809			Thermomicrobia_unclassified	0.0000850825164277323	Aquihabitans	0.00100397369384724			Hyphomicrobiaceae	0.0429485	Lachnospiraceae_unclassified	6.43648			Desulfovibrionales_unclassified	0.11486	Finegoldia	0.00193043
		Bacteria_unclassified	0.258564535461884	Caproiciproducens	0.000714689732767299			Deferribacteraceae	0.00182076585155347	Actinobacteria_unclassified	0.0310551184961223			JG34-KF-361	0.000482567	Marvinbryantia	0.00530824			Geobacteraceae	0.00144782	Gallicola	0.0357129
		Bacteroidetes_unclassified	0.16774789013381	Faecalibacterium	0.12056135134896					Actinomyces	0.0727285350424255			Methylobacteriaceae	0.0308843	Mobilitalea	0.0115816			Cystobacteraceae	0.00144782	Helcococcus	0.0530868
		Bacteroidaceae	1.5973145363127	Fastidiosipila	0.0446851247201649					Actinomycetaceae_unclassified	0.00325015212753937			Methylocystaceae	0.000482567	Oribacterium	0.03571			Myxococcaceae	0.000482607	Murdochiella	0.00241303
		Bacteroidales_BS11_gut_group	0.0334372696401843	Syntrophomonadaceae_unclassified	0.000153147799878707					Arcanobacterium	0.00202496389098003			Rhodobacteraceae	0.247557	Pseudobutyrivibrio	0.000482567			Myxococcales_unclassified	0.00868692	Guggenheimella	0.0115826
		Bacteroidales_S24-7_group	0.162728045582231	Syntrophomonas	0.0000340328444174904					Flaviflexus	0.0320590921899695			Acetobacteraceae	0.0361925	Roseburia	0.0328146			Nannocystaceae	0.000965214	Anaerovorax	0.00193043
		Bacteroidales_unclassified	0.487537512702759	Catabacter	0.000204197066504943					Trueperella	0.00253545898954642			DA111	0.0014477	Sellimonas	0.174689			Polyangiaceae	0.000965214	Clostridiales_Incertae_Sedis_XIII_unclassified	0.0347477
		Marinilabiaceae	0.0000170164222087452	Christensenellaceae_R-7_group	0.220073388425702					Varibaculum	0.00258650849940306			Rhodospirillaceae	0.0883098	Shuttleworthia	0.0139945			Vulgatibacteraceae	0.000482607	Mogibacterium	0.0130304
		Porphyromonadaceae	0.39015252840211	Christensenellaceae_unclassified	0.000459443399636121					Brachybacterium	2.49155641106971			Rhodospirillales_Incertae_Sedis	0.00241284	Blautia	0.164073			Campylobacteraceae	0.029439	Clostridiales_unclassified	6.83275
		Prevotellaceae	0.273130592872569	Anaerobacter	0.0000170164222087452					Dermabacteraceae_unclassified	0.00898471373476853			Rhodospirillales_unclassified	0.00868621	Stomatobaculum	0.000482567			Helicobacteraceae	0.0221999	Acetobacterium	0.00144782
		Rikenellaceae	0.98793944059533	Clostridium_sensu_stricto_18	0.0000340328444174904					Dermacoccaceae_unclassified	0.000102099019713279			Mitochondria	0.0347448	Tyzzerella	0.0796236			Aeromonadaceae	0.189182	Alkalibaculum	0.00434346
		Bacteroidia_unclassified	0.133970292049451	Clostridium_sensu_stricto_19	0.0000170164222087452					Dietzia	0.565271222642568			Rickettsiaceae	0.00675594	Tyzzerella_3	0.0448788			Succinivibrionaceae	0.0250956	Anaerofustis	0.0183391
		Cyclobacteriaceae	0.000408394133009885	Clostridium_sensu_stricto_2	0.000153147799878707					Geodermatophilaceae_unclassified	0.0000170165032855465			Rickettsiales_Incertae_Sedis	0.00241284	Tyzzerella_4	0.0014477			Alcanivoracaceae	0.015926	Eubacteriaceae_unclassified	0.00434346
		Cryomorphaceae	0.0000170164222087452	Clostridium_sensu_stricto_7	0.0000170164222087452					Geodermatophilus	0.0000170165032855465			Rickettsiales_fa	0.000482567	Butyrivibrio	0.000482567			Halomonadaceae	0.0569476	Eubacterium	0.00193043
		Flavobacteriaceae	0.0211854456498878	Hathewaya	0.0000340328444174904					Glycomyces	0.00253545898954642			Rickettsiales_unclassified	0.00965135	Cellulosilyticum	0.0130293			Oceanospirillaceae	0.0221999	Allobaculum	0.00241303
		Chitinophagaceae	0.0000340328444174904	Proteiniclasticum	0.0000680656888349809					Glycomycetaceae_unclassified	0.0000510495098566394			T9d	0.000482567	Coprococcus_1	0.190131			Oceanospirillales_incertae_sedis	0.00579128	Holdemanella	0.000482607
		Saprospiraceae	0.0000510492666262356	Candidatus_Arthromitus	0.0343731728616653					Stackebrandtia	0.0067045022945053			7B-8	0.000965135	Coprococcus_2	0.00193027			Oceanospirillales_unclassified	0.000482607	Holdemania	0.0352303
		Sphingobacteriaceae	0.0272943412228273	Clostridiaceae_1_ge	0.000255246333131178					Intrasporangiaceae_unclassified	0.00610892467951118			Ellin6055	0.000965135	Coprococcus_3	0.00579081			Orbaceae	0.0067565	Kandleria	0.000965214
		Sphingobacteriales_unclassified	0.0000170164222087452	Clostridiaceae_1_unclassified	0.0946113074806234					Janibacter	0.0277369003554407			Erythrobacteraceae	0.0250935	Desulfitobacterium	0.000482567			Pasteurellaceae	0.319003	Sharpea	0.000482607
		Chlamydiaceae	0.00228020057597186	Clostridium_sensu_stricto_1	2.51701812385097					Ornithinimicrobium	0.0109245951093208			JG34-KF-161	0.0014477	Desulfosporosinus	0.000482567			Moraxellaceae	2.05784	Solobacterium	0.000965214
		JG30-KF-CM45_fa	0.0220702996047425	Alkaliphilus	0.000323312021966159					Jonesia	0.000646627124850765			Sphingomonadaceae	0.171794	Peptococcaceae_unclassified	0.0656291			Pseudomonadaceae	0.605672	Turicibacter	0.529902
		Sphaerobacteraceae	0.0000170164222087452	Clostridiaceae_2_unclassified	0.0000680656888349809					Kineococcus	0.0000170165032855465			Sphingomonadales_unclassified	0.0574255	Peptococcus	0.11099			Piscirickettsiaceae	0.0173738	Catenibacterium	0.000482607
		Caldilineaceae	0.0000170164222087452	Clostridiales_unclassified	0.120748531993256					Quadrisphaera	0.0000340330065710929			SC-I-84_fa	0.00241284	Asaccharospora	0.000965135			Vibrionaceae	0.0115826	Clostridium_XVIII	0.126926
		Chloroflexi_unclassified	0.0000170164222087452	Clostridiales_vadinBB60_group_ge	0.0172376356974589					Agrococcus	0.000153148529569918			Betaproteobacteria_unclassified	0.046809	Romboutsia	0.414043			Sinobacteraceae	0.00965214	Eggerthia	0.000482607
				Defluviitalea	0.000102098533252471					Microbacteriaceae_unclassified	0.0460126248841176			Alcaligenaceae	0.654844	Terrisporobacter	0.0410182			Xanthomonadaceae	0.994653	Erysipelothrix	0.152021
				Defluviitaleaceae_UCG-011	0.00239931553143308					Microbacterium	0.00173568333512574			Burkholderiaceae	0.0193027	Filifactor	0.000482567			Alteromonadaceae	0.0144782	Erysipelotrichaceae_unclassified	0.557894
				Defluviitaleaceae_unclassified	0.0000340328444174904					Mycetocola	0.0000170165032855465			Burkholderiales_unclassified	0.00820364	Intestinibacter	0.0241284			Alteromonadales_incertae_sedis	0.00241303	Faecalicoccus	0.257229
				Alkalibaculum	0.0000680656888349809					Pseudoclavibacter	0.0000340330065710929			Comamonadaceae	0.204609	Paeniclostridium	0.00241284			Idiomarinaceae	0.0106174	Faecalitalea	0.0318521
				Anaerofustis	0.00146341230995209					Rathayibacter	0.0000850825164277323			Oxalobacteraceae	0.0728677	Paraclostridium	0.0014477			Pseudoalteromonadaceae	0.000482607	Firmicutes_unclassified	2.66254
				Eubacteriaceae_unclassified	0.0000680656888349809					Clavibacter	0.0000850825164277323			Hot_Creek_32_fa	0.000482567	Peptoclostridium	0.00193027			Shewanellaceae	0.00965214	Acidaminococcaceae_unclassified	0.0603259
				Eubacterium	0.0000340328444174904					Cryobacterium	0.000119115522998825			Hydrogenophilaceae	0.0120642	Peptostreptococcaceae_unclassified	0.55254			Cardiobacteriaceae	0.0144782	Acidaminococcus	0.000482607
				Garciella	0.000170164222087452					Curtobacterium	0.000374363072282022			Methylophilaceae	0.00337797	Peptostreptococcus	0.0279889			Chromatiaceae	0.0357129	Phascolarctobacterium	0.0603259
				MBA03_ge	0.0000340328444174904					Frondihabitans	0.000221214542712104			Neisseriaceae	0.0241284	Proteocatella	0.00434311			Enterobacteriaceae	0.230203	Selenomonadales_unclassified	0.000482607
				Gelria	0.0000340328444174904					Gulosibacter	0.000476462091995301			Nitrosomonadaceae	0.00772108	Acetanaerobacterium	0.000482567			Gilvimarinus	0.0130304	Megamonas	0.0641867
				Syntrophaceticus	0.0000510492666262356					Leifsonia	0.0000170165032855465			Rhodocyclaceae	0.0366751	Flavonifractor	0.281819			Marinicella	0.000482607	Megasphaera	0.0168912
				Erysipelotrichaceae_ge	0.0189562943405422					Leucobacter	0.014821374361711			Bacteriovoracaceae	0.00772108	Hydrogenoanaerobacterium	0.014477			Gammaproteobacteria_unclassified	0.0965214	Mitsuokella	0.00144782
				Erysipelotrichaceae_unclassified	0.300799295383989					Actinomycetales_unclassified	0.342065749046055			Bdellovibrionaceae	0.0149596	Intestinimonas	0.00579081			Coxiellaceae	0.00144782	Selenomonas	0.00482607
				Faecalicoccus	0.0149404186992783					Arthrobacter	0.0093760933103361			Syntrophaceae	0.000965135	Oscillibacter	0.213295			Legionellaceae	0.00241303	Sporolituus	0.000482607
				Faecalitalea	0.0759953415842561					Yaniella	1.52786078049936			Bradymonadaceae	0.0197853	Oscillospira	0.0304017			Methylococcaceae	0.000965214	Veillonella	0.0332999
				Holdemania	0.002671578286773					Citricoccus	0.000255247549283197			Bradymonadales_fa	0.000482567	Pseudoflavonifractor	0.0275063			Proteobacteria_unclassified	0.265434	Veillonellaceae_unclassified	0.0279912
				Turicibacter	3.03763556132753					Enteractinococcus	0.00115712222341716			Bradymonadales_unclassified	0.000965135	Ruminiclostridium	0.0386054			SR1_unclassified	0.00241303	Fusobacteriaceae_unclassified	0.00144782
				Candidatus_Stoquefichus	0.0560691111778155					Garicola	0.0000340330065710929			Deltaproteobacteria_unclassified	0.0164073	Ruminiclostridium_5	0.529376			Spirochaetaceae	0.0212347	Fusobacterium	0.099417
				Dielma	0.00335223517512281					Kocuria	0.0180034604761081			Desulfovibrionaceae	0.624925	Ruminiclostridium_6	0.00772108			Synergistaceae	0.0854214	Leptotrichia	0.00193043
				Erysipelatoclostridium	0.244934381272679					Micrococcaceae_unclassified	0.05402739793161			Desulfovibrionales_unclassified	0.00916878	Ruminiclostridium_9	0.767765			Acholeplasmataceae	0.0188217	Sebaldella	0.000482607
				Erysipelothrix	0.0132728093228213					Micrococcus	0.000935907680705055			Desulfurellaceae	0.000965135	Anaerofilum	0.167451			Spiroplasmataceae	0.000482607	Gemmatimonas	0.00482607
				Erysipelotrichaceae_UCG-003	0.0310209376865425					Nesterenkonia	0.0130346415167286			Geobacteraceae	0.0014477	Ruminococcaceae_NK4A214_group	0.130293			Mycoplasmataceae	0.00289564	Victivallis	0.099417
				Erysipelotrichaceae_UCG-004	0.000374361288592395					Rothia	0.0160295460949848			Archangiaceae	0.000482567	Ruminococcaceae_UCG-002	0.0472916			Fervidobacteriaceae	0.000482607	Oligosphaera	0.000482607
				Firmicutes_unclassified	0.221689948535533					Micromonosporaceae_unclassified	0.0000680660131421858			Sandaracinaceae	0.0125467	Ruminococcaceae_UCG-004	0.0197853			Opitutae_unclassified	0.00579128	Nitrospira	0.00144782
				Acidaminococcaceae_unclassified	0.0000850821110437261					Mycobacterium	0.0000510495098566394			Vulgatibacteraceae	0.000482567	Ruminococcaceae_UCG-005	0.356135			Opitutaceae	0.00289564	Parcubacteria_unclassified	0.000482607
				Phascolarctobacterium	0.321984741033877					Nakamurella	0.0000340330065710929			mle1-27	0.000482567	Ruminococcaceae_UCG-007	0.0352274			Puniceicoccaceae	0.0386085	Planctomycetes_unclassified	0.00193043
				Selenomonadales_unclassified	0.0000170164222087452					Gordonia	0.00076574264784959			BIrii41	0.000482567	Ruminococcaceae_UCG-008	0.262517			Spartobacteria_unclassified	0.00193043	Aquisphaera	0.00434346
				uncultured	0.000306295599757414					Rhodococcus	0.000476462091995301			Haliangiaceae	0.0014477	Ruminococcaceae_UCG-009	0.115816			Subdivision3_unclassified	0.000482607	Planctomycetaceae_unclassified	0.0164086
				Megamonas	0.0469993581405543					Aeromicrobium	0.000425412582138661			Myxococcaceae	0.000965135	Ruminococcaceae_UCG-010	0.276994			Subdivision5_unclassified	0.00434346	Rhodopirellula	0.00482607
				Megasphaera	0.0227679729153011					Nocardioidaceae_unclassified	0.00306297059139836			Myxococcales_unclassified	0.00386054	Ruminococcaceae_UCG-011	0.00193027			Verrucomicrobia_unclassified	0.00337825	Singulisphaera	0.000482607
				Veillonellaceae_unclassified	0.110827957845558					Nocardioides	0.000170165032855465			Nannocystaceae	0.000965135	Ruminococcaceae_UCG-013	0.542888			Verrucomicrobiaceae	0.056465	Ilumatobacter	0.00289564
				Fusobacteriaceae_unclassified	0.000561541932888592					Nocardiopsaceae_unclassified	0.00382871323924795			P3OB-42	0.000965135	Anaerotruncus	0.797684			candidate_division_WPS-1_unclassified	0.00241303	Acidimicrobiales_unclassified	0.00289564
				Fusobacterium	0.885806874498441					Nocardiopsis	0.0531085067541905			Phaselicystidaceae	0.000482567	Ruminococcaceae_UCG-014	4.09072			Armatimonadetes_gp5_unclassified	0.000965214	Aquihabitans	0.00482607
				Fusobacteriales_unclassified	0.0000170164222087452					Promicromonospora	0.0000170165032855465			Polyangiaceae	0.0014477	Ruminococcaceae_V9D2013_group	0.0250935			Armatimonadetes_gp7_unclassified	0.000482607	Iamiaceae_unclassified	0.000965214
				Hydrogenedentes_ge	0.0000170164222087452					Luteococcus	0.0000510495098566394			NB1-j_fa	0.000482567	Ruminococcaceae_ge	0.412112			Armatimonadetes_unclassified	0.000482607	Actinobacteria_unclassified	0.0183391
				Acidimicrobiales_unclassified	0.000289279177548669					Propionibacteriaceae_unclassified	0.00466252190023973			0319-6G20	0.000965135	Ruminococcaceae_unclassified	5.64314			Bacteria_unclassified	6.18316	Actinomyces	0.058878
				Iamia	0.000714689732767299					Propionibacterium	0.0000170165032855465			Oligoflexaceae	0.0028954	Ruminococcus_1	0.124985			Bacteroidetes_unclassified	0.943014	Actinomycetaceae_unclassified	0.042952
				Actinobacteria_unclassified	0.0512874965371581					Tessaracoccus	0.000935907680705055			Campylobacteraceae	0.0294366	Ruminococcus_2	0.0448788			Bacteroidaceae	2.2948	Arcanobacterium	0.0072391
				Luedemannella	0.0000340328444174904					Pseudonocardia	0.0000510495098566394			Helicobacteraceae	0.0221981	Sporobacter	0.0135119			Bacteroidales_unclassified	1.11723	Flaviflexus	0.123547
				Micromonosporaceae_unclassified	0.0000340328444174904					Pseudonocardiaceae_unclassified	0.000578561111708579			195up_fa	0.000482567	Subdoligranulum	0.562673			Marinilabiliaceae	0.0111	Mobiluncus	0.000482607
				Stackebrandtia	0.00670447035024562					Saccharopolyspora	0.000221214542712104			Gammaproteobacteria_unclassified	0.079141	Butyricicoccus	0.382676			Porphyromonadaceae	1.14185	Trueperella	0.0173738
				Aeromicrobium	0.00039137771080114					Beutenbergiaceae_unclassified	0.0000170165032855465			HTA4_fa	0.00193027	Candidatus_Soleaferrea	0.0569429			Prevotellaceae	0.296803	Varibaculum	0.0226825
				Nocardioidaceae_unclassified	0.000374361288592395					Haloactinobacterium	0.000170165032855465			Coxiellaceae	0.0014477	Caproiciproducens	0.0579081			Rikenellaceae	0.323829	Demequina	0.000965214
				Nocardioides	0.00289279177548669					Ruania	0.00023823104599765			Legionellaceae	0.00241284	Ercella	0.000482567			Cyclobacteriaceae	0.0386085	Brachybacterium	7.74439
				Luteococcus	0.0000340328444174904					Ruaniaceae_unclassified	0.000340330065710929			Legionellales_unclassified	0.000482567	Faecalibacterium	0.361443			Cytophagaceae	0.0801127	Dermabacter	0.000965214
				Marinilutecoccus	0.000102098533252471					Sanguibacter	0.000833808660991776			Methylococcales_unclassified	0.000965135	Fastidiosipila	0.085897			Cytophagales_unclassified	0.00627389	Dermabacteraceae_unclassified	0.0492259
				Propionibacteriaceae_unclassified	0.00437322050764752					Kitasatospora	0.00239932696326205			Alcanivoracaceae	0.0125467	Syntrophomonadaceae_unclassified	0.0188201			Flammeovirgaceae	0.000965214	Dermacoccaceae_unclassified	0.00579128
				Propionibacterium	0.0000170164222087452					Streptomyces	0.000884858170848416			Halomonadaceae	0.0569429	Catabacter	0.0101339			Ohtaekwangia	0.00193043	Dermacoccus	0.00482607
				Tessaracoccus	0.0010550181769422					Streptomycetaceae_unclassified	0.000357346568996476			Oceanospirillaceae	0.03571	Christensenellaceae_R-7_group	0.82326			Cryomorphaceae	0.0419868	Kytococcus	0.00916953
				Propionibacteriales_unclassified	0.000136131377669962					Bogoriellaceae_unclassified	0.00076574264784959			Oceanospirillales_unclassified	0.00434311	Christensenellaceae_unclassified	0.0241284			Flavobacteriaceae	1.19928	Dietzia	0.183873
				Pseudonocardia	0.0000510492666262356					Georgenia	0.00442429085424208			Orbaceae	0.00627337	Clostridium_sensu_stricto_2	0.0487393			Flavobacteriales_unclassified	0.0115826	Blastococcus	0.00482607
				Pseudonocardiaceae_unclassified	0.000561541932888592					Brevibacteriaceae_unclassified	0.00323313562425383			Pasteurellaceae	0.318977	Clostridium_sensu_stricto_7	0.00868621			Chitinophagaceae	0.0569476	Geodermatophilaceae_unclassified	0.00144782
				Saccharopolyspora	0.000204197066504943					Brevibacterium	1.04563009389026			Moraxellaceae	2.05525	Clostridium_sensu_stricto_8	0.000482567			Rhodothermaceae	0.000965214	Geodermatophilus	0.00193043
				Kitasatospora	0.00238229910922433					Corynebacteriaceae_unclassified	0.00963134085961929			Pseudomonadaceae	0.51683	Hathewaya	0.00337797			Saprospiraceae	0.000482607	Modestobacter	0.00241303
				Streptomyces	0.000986952488107223					Corynebacterium	4.9521768191663			Piscirickettsiaceae	0.0168899	Proteiniclasticum	0.0125467			Sphingobacteriaceae	0.470542	Glycomyces	0.0173738
				Streptomycetaceae_unclassified	0.000272262755339923					Tomitella	0.000153148529569918			Vibrionaceae	0.0115816	Youngiibacter	0.000965135			Sphingobacteriales_unclassified	0.0115826	Glycomycetaceae_unclassified	0.00241303
				Allosalinactinospora	0.000374361288592395					Aeriscardovia	0.146358944758985			KCM-B-112	0.000965135	Candidatus_Arthromitus	0.0265412			Candidatus_Saccharibacteria_unclassified	0.126926	Stackebrandtia	0.0265434
				Nocardiopsaceae_ge	0.0000510492666262356					Bifidobacteriaceae_unclassified	0.0271413227404466			Nevskiaceae	0.00530824	Clostridiaceae_1_ge	0.0197853			Chlamydiaceae	0.00627389	Intrasporangiaceae_unclassified	0.152504
				Nocardiopsaceae_unclassified	0.00598978061747832					Bifidobacterium	0.603932718107329			Solimonadaceae	0.00241284	Clostridiaceae_1_unclassified	0.1993			Chlamydiales_unclassified	0.00772171	Janibacter	0.0154434
				Nocardiopsis	0.0509812009374007					Slackia	0.0258821014973162			Xanthomonadaceae	0.994571	Clostridium_sensu_stricto_1	0.0989263			Parachlamydiaceae	0.00579128	Ornithinimicrobium	0.0168912
				Streptosporangiales_unclassified	0.0000340328444174904					Collinsella	0.2346405638044			Xanthomonadales_Incertae_Sedis	0.00434311	Clostridium_sensu_stricto_10	0.000482567			Anaerolineaceae	0.000482607	Oryzihumus	0.000965214
				Actinomyces	0.0727111720979683					Coriobacteriaceae_unclassified	0.117124592114416			Aeromonadaceae	0.189649	Clostridium_sensu_stricto_12	0.000482567			Caldilineaceae	0.00144782	Phycicoccus	0.00144782
				Actinomycetaceae_ge	0.000102098533252471					Coriobacterium	0.0000680660131421858			Succinivibrionaceae	0.0236458	Clostridium_sensu_stricto_13	0.000965135			Chloroflexi_unclassified	0.0246129	Terrabacter	0.00193043
				Actinomycetaceae_unclassified	0.00166760937645703					Denitrobacterium	0.0000340330065710929			Alteromonadaceae	0.0231632	Clostridium_sensu_stricto_15	0.000482567			Ktedonobacteraceae	0.000482607	Tetrasphaera	0.00241303
				Arcanobacterium	0.00199092139842319					Eggerthella	0.0000510495098566394			Idiomarinaceae	0.0106165	Alkaliphilus	0.00916878			Sphaerobacteraceae	0.0255782	Jonesia	0.00579128
				Flaviflexus	0.0315484467750136					Enterorhabdus	0.0000170165032855465			Pseudoalteromonadaceae	0.000482567	Clostridiaceae_2_unclassified	0.000482567			Thermomicrobia_unclassified	0.00241303	Kineococcus	0.00868692
				Trueperella	0.00245036479805931					Gordonibacter	0.000136132026284372			Shewanellaceae	0.00965135	Natronincola	0.000482567			Deferribacteraceae	0.0284738	Kineosporia	0.000482607
				Varibaculum	0.00256947975352053					Olsenella	0.384487891736922			Cardiobacteriaceae	0.014477	Clostridiisalibacter	0.0028954					Pseudokineococcus	0.00144782
				Actinopolysporaceae_ge	0.0000170164222087452					Nitriliruptor	0.0000340330065710929			Cellvibrionaceae	0.0965135	Clostridiales_unclassified	1.3647					Quadrisphaera	0.000482607
				Aeriscardovia	0.14591582043999					Patulibacter	0.0000680660131421858			Cellvibrionales_unclassified	0.00241284	Clostridiales_vadinBB60_group_ge	0.533237					Agrococcus	0.00530868
				Bifidobacteriaceae_unclassified	0.0321440215523197					Solirubrobacter	0.0000340330065710929			Porticoccaceae	0.00241284	Defluviitalea	0.000482567					Microbacteriaceae_unclassified	0.366299
				Bifidobacterium	0.599335406614215					Actinobacteria_unclassified	0.00141236977270036			Spongiibacteraceae	0.000482567	Defluviitaleaceae_UCG-011	0.03571					Microbacterium	0.0178565
				Corynebacteriaceae_unclassified	0.405229078479059					Alphaproteobacteria_unclassified	0.000204198039426557			Chromatiaceae	0.03571	Acetobacterium	0.0014477					Rathayibacter	0.00241303
				Corynebacterium	0.127078641054909					Brevundimonas	0.0000170165032855465			Enterobacteriaceae	0.230185	Alkalibacter	0.000482567					Clavibacter	0.0067565
				Corynebacterium_1	4.43859760177352					Aureimonas	0.000102099019713279			Proteobacteria_unclassified	0.126915	Alkalibaculum	0.00337797					Cryobacterium	0.00193043
				Lawsonella	0.00039137771080114					Rhizobiales_unclassified	0.000255247549283197			RsaHf231_fa	0.00241284	Anaerofustis	0.0241284					Frondihabitans	0.00241303
				Tomitella	0.000119114955461217					Bosea	0.0000170165032855465			SR1_(Absconditabacteria)_fa	0.00337797	Eubacteriaceae_unclassified	0.000965135					Gulosibacter	0.0101347
				Corynebacteriales_unclassified	0.0756209802956637					Brucellaceae_unclassified	0.000884858170848416			Saccharibacteria_fa	0.0892749	Eubacterium	0.00530824					Herbiconiux	0.000965214
				Dietzia	0.558955436712863					Falsochrobactrum	0.000153148529569918			Spirochaetaceae	0.0328146	Garciella	0.00579081					Leifsonia	0.000965214
				Mycobacterium	0.0000510492666262356					Ochrobactrum	0.000306297059139836			Chthonomonadaceae	0.000482567	ODP1230B8.23_ge	0.0014477					Leucobacter	0.149126
				Gordonia	0.000765738999393535					Paenochrobactrum	0.000374363072282022			Fimbriimonadaceae	0.0014477	M55-D21_ge	0.0014477					Actinomycetales_unclassified	1.27553
				Rhodococcus	0.000476459821844866					Devosia	0.000442429085424208			Synergistaceae	0.0849318	MBA03_ge	0.00337797					Arthrobacter	0.085904
				Blastococcus	0.0000170164222087452					Hyphomicrobiaceae_unclassified	0.00023823104599765			TM6_(Dependentiae)_fa	0.000965135	Gelria	0.00241284					Yaniella	1.07284
				Geodermatophilus	0.0000170164222087452					Hyphomicrobium	0.0000170165032855465			Acholeplasmataceae	0.0159247	Allobaculum	0.00241284					Zhihengliuella	0.000482607
				Nakamurella	0.0000340328444174904					Methylobacterium	0.00023823104599765			Spiroplasmataceae	0.000482567	Erysipelotrichaceae_ge	0.0723851					Citricoccus	0.0313694
				Glycomyces	0.00253544690910304					Phyllobacteriaceae_unclassified	0.000170165032855465			Haloplasmataceae	0.000482567	Erysipelotrichaceae_unclassified	0.569429					Enteractinococcus	0.0178565
				Glycomycetaceae_unclassified	0.0000680656888349809					Phyllobacterium	0.0000170165032855465			Mollicutes_RF9_fa	3.05224	Faecalicoccus	0.0139945					Garicola	0.000482607
				Kineococcus	0.0000170164222087452					Kaistia	0.0000170165032855465			Mollicutes_unclassified	0.0164073	Faecalitalea	0.0448788					Kocuria	0.0907301
				Quadrisphaera	0.0000340328444174904					Neorhizobium	0.000323313562425383			Mycoplasmataceae	0.00482567	Holdemanella	0.000482567					Micrococcaceae_unclassified	0.420833
				Beutenbergiaceae_unclassified	0.0000340328444174904					Rhizobiaceae_unclassified	0.000102099019713279			NB1-n_fa	0.00579081	Holdemania	0.032332					Micrococcus	0.0805953
				Salana	0.0000680656888349809					Paracoccus	0.00127623774641598			Fervidobacteriaceae	0.000482567	Kandleria	0.000965135					Nesterenkonia	0.0458477
				Jonesia	0.000595574777306083					Rhodobacteraceae_unclassified	0.00141236977270036			OPB35_soil_group_fa	0.000482567	Sharpea	0.000482567					Rothia	0.115826
				Lysinimonas	0.0000170164222087452					Rhodospirillaceae_unclassified	0.000102099019713279			Opitutae_unclassified	0.0226807	Solobacterium	0.00193027					Actinoplanes	0.000482607
				Microbacteriaceae_unclassified	0.0326545142185821					Rhodospirillales_unclassified	0.0000340330065710929			Opitutae_vadinHA64_fa	0.0149596	Turicibacter	0.49994					Micromonosporaceae_unclassified	0.00241303
				Microbacterium	0.000510492666262356					Erythrobacteraceae_unclassified	0.000102099019713279			Opitutaceae	0.0028954	Candidatus_Stoquefichus	0.0149596					Mycobacterium	0.0144782
				Plantibacter	0.000272262755339923					Sphingomonadaceae_unclassified	0.0000340330065710929			Puniceicoccaceae	0.0125467	Catenibacterium	0.0014477					Nakamurella	0.00434346
				Pseudoclavibacter	0.000102098533252471					Sphingomonas	0.0000510495098566394			Chthoniobacteraceae	0.000965135	Catenisphaera	0.000482567					Gordonia	0.0125478
				Rathayibacter	0.0000850821110437261					Sphingopyxis	0.0000340330065710929			DA101_soil_group	0.00193027	Dielma	0.0270238					Rhodococcus	0.0072391
				Clavibacter	0.0000170164222087452					Betaproteobacteria_unclassified	0.000714693137992951			Verrucomicrobia_unclassified	0.0014477	Erysipelatoclostridium	0.374472					Williamsia	0.000965214
				Cryobacterium	0.0000850821110437261					Alcaligenaceae_unclassified	0.0024163434665476			DEV007	0.000482567	Erysipelothrix	0.168416					Aeromicrobium	0.0337825
				Curtobacterium	0.000340328444174904					Oligella	0.00211004640740776			Verrucomicrobiaceae	0.0574255	Erysipelotrichaceae_UCG-003	0.021233					Marmoricola	0.00193043
				Frondihabitans	0.0000340328444174904					Paenalcaligenes	0.0174929653775418			WCHB1-41_fa	0.0164073	Erysipelotrichaceae_UCG-004	0.0188201					Nocardioidaceae_unclassified	0.0212347
				Leifsonia	0.0000170164222087452					Burkholderiales_unclassified	0.0135281201120094			BJ-169_fa	0.000965135	Firmicutes_unclassified	0.597418					Nocardioides	0.0366781
				Leucobacter	0.0300510016206441					Comamonadaceae_unclassified	0.000136132026284372			BRC1_fa	0.0028954	Acidaminococcus	0.000482567					Nocardiopsaceae_unclassified	0.197869
				Citricoccus	0.000442426977427376					Comamonas	0.000493478595280847			Bacteria_unclassified	1.02546	Phascolarctobacterium	0.120159					Nocardiopsis	0.186286
				Rothia	0.0153488128322882					Herbaspirillum	0.0000510495098566394			Rhodothermaceae	0.000965135	Anaerovibrio	0.000482567					Streptomonospora	0.000965214
				Yaniella	1.5218126709725					Oxalobacter	0.0000510495098566394			Bacteroidetes_unclassified	0.328628	Megamonas	0.0641814					Thermobifida	0.000965214
				Enteractinococcus	0.00551332079563345					Oxalobacteraceae_unclassified	0.000867841667562869			Bacteroidaceae	2.60683	Megasphaera	0.017855					Cellulosimicrobium	0.000965214
				Glutamicibacter	0.00454338472973497					Parasutterella	0.0474420111601035			p-2534-18B5_gut_group	0.000482567	Mitsuokella	0.0014477					Promicromonospora	0.00241303
				Kocuria	0.0170164222087452					Sutterella	0.00134430375955817			Bacteroidales_BS11_gut_group	0.0135119	Selenomonas	0.00434311					Luteococcus	0.00193043
				Micrococcaceae_unclassified	0.0518660548922554					Sutterellaceae_unclassified	0.0111628261553185			Bacteroidales_RF16_group	0.0014477	Selenomonas_3	0.000482567					Mariniluteicoccus	0.000482607
				Micrococcus	0.0000850821110437261					Neisseriaceae_unclassified	0.000187181536141011			Bacteroidales_S24-7_group	0.156352	Thermosinus	0.000482567					Propionibacteriaceae_unclassified	0.0685302
				Nesterenkonia	0.0202325260061981					Nitrosomonas	0.0000850825164277323			Bacteroidales_unclassified	0.68042	Veillonella	0.00434311					Propionibacterium	0.00434346
				Paeniglutamicibacter	0.0000170164222087452					Azoarcus	0.0000340330065710929			Marinilabiaceae	0.0115816	Veillonellaceae_unclassified	0.0410182					Tessaracoccus	0.0231651
				Pseudarthrobacter	0.0000170164222087452					Rhodocyclaceae_unclassified	0.000935907680705055			Porphyromonadaceae	0.900953	Fusobacteriaceae_unclassified	0.00386054					Actinomycetospora	0.00289564
				Micrococcales_unclassified	0.218592959693541					Bradymonas	0.0000680660131421858			Prevotellaceae	0.366269	Fusobacterium	0.096996					Pseudonocardia	0.00241303
				Promicromonospora	0.0000170164222087452					Deltaproteobacteria_unclassified	0.00023823104599765			Rikenellaceae	0.748462	Leptotrichia	0.00193027					Pseudonocardiaceae_unclassified	0.00386085
				Haloactinobacterium	0.00112308386577718					Bilophila	0.00539423154151823			Bacteroidia_unclassified	0.0694897	Sebaldella	0.000482567					Saccharomonospora	0.00193043
				Ruania	0.00255246333131178					Desulfovibrio	0.220516866077396			Cyclobacteriaceae	0.0395705	AKAU4049_ge	0.000482567					Saccharopolyspora	0.000965214
				Ruaniaceae_unclassified	0.0000680656888349809					Desulfovibrionaceae_unclassified	0.00149745228912809			Cytophagaceae	0.0854144	BD2-11_terrestrial_group_ge	0.000482567					Haloactinobacterium	0.00144782
				Sanguibacter	0.000833804688228516					Lawsonia	0.000731709641278498			Flammeovirgaceae	0.00772108	Gemmatimonadaceae_unclassified	0.00337797					Ruania	0.00193043
				Bogoriella	0.000272262755339923					Desulfovibrionales_unclassified	0.0255758044381763			MWH-CFBk5	0.00337797	Gemmatimonas	0.000965135					Ruaniaceae_unclassified	0.00386085
				Bogoriellaceae_unclassified	0.0000680656888349809					Campylobacter	0.00023823104599765			Cytophagia_unclassified	0.000482567	Gemmatirosa	0.000965135					Sanguibacter	0.00289564
				Georgenia	0.0000850821110437261					Helicobacter	0.0167612557362633			Cryomorphaceae	0.0419834	Longimicrobiaceae_ge	0.00241284					Kitasatospora	0.000965214
				Brevibacteriaceae_unclassified	0.00185479002075323					Aeromonadaceae_unclassified	0.06648347833663			Flavobacteriaceae	1.21559	Longimicrobium	0.00241284					Streptomyces	0.0144782
				Brevibacterium	1.03728706500069					Oceanimonas	0.0000170165032855465			NS9_marine_group	0.000482567	S0134_terrestrial_group_ge	0.0014477					Streptomycetaceae_unclassified	0.00868692
				Brachybacterium	2.47107378388735					Oceanisphaera	0.023635923063624			Chitinophagaceae	0.0429485	Acidimicrobiaceae_unclassified	0.000965135					Thermopolyspora	0.000482607
				Dermabacteraceae_unclassified	0.0212705277609315					Anaerobiospirillum	0.0000170165032855465			Lentimicrobiaceae	0.00241284	CL500-29_marine_group	0.000482567					Bogoriellaceae_unclassified	0.0139956
				Helcobacillus	0.000102098533252471					Succinatimonas	0.000901874674133962			ST-12K33	0.0014477	Candidatus_Microthrix	0.0028954					Georgenia	0.0144782
				Demetria	0.0000340328444174904					Halomonadaceae_unclassified	0.000187181536141011			Saprospiraceae	0.0260586	Acidimicrobiales_unclassified	0.00579081					Brevibacteriaceae_unclassified	0.0255782
				Dermacoccaceae_unclassified	0.000204197066504943					Halomonas	0.00808283906063456			Sphingobacteriaceae	0.504283	Iamia	0.00386054					Brevibacterium	0.893788
				Dermatophilaceae_unclassified	0.0000170164222087452					Marinospirillum	0.0000340330065710929			Sphingobacteriales_unclassified	0.00627337	OM1_clade_ge	0.000965135					Actinotalea	0.000965214
				Intrasporangiaceae_unclassified	0.0120986761904178					Pseudohongiella	0.0000340330065710929			env.OPS_17	0.000965135	Actinobacteria_unclassified	0.21812					Cellulomonadaceae_unclassified	0.0067565
				Janibacter	0.0209982650055916					Avibacterium	0.000408396078853115			Chlamydiaceae	0.00627337	Actinoplanes	0.000482567					Cellulomonas	0.00193043
				Kribbia	0.0000510492666262356					Gallibacterium	1.60693647126729			Chlamydiales_unclassified	0.00193027	Luedemannella	0.000482567					Corynebacteriaceae_unclassified	0.0250956
				Ornithinimicrobium	0.010754378835927					Pasteurellaceae_unclassified	0.000510495098566394			Parachlamydiaceae	0.00386054	Micromonosporaceae_unclassified	0.00193027					Corynebacterium	7.1836
				Serinicoccus	0.0000510492666262356					Acinetobacter	0.0253205568888931			Simkaniaceae	0.00772108	Stackebrandtia	0.0265412					Tomitella	0.000965214
				Actinobacteria_unclassified	0.0309018227310813					Moraxella	0.0000680660131421858			Anaerolineaceae	0.000965135	Aeromicrobium	0.0352274					Jatrophihabitans	0.00144782
				Atopobium	0.00159954368762205					Moraxellaceae_unclassified	0.0000850825164277323			TK10_fa	0.000965135	Marmoricola	0.0028954					Aeriscardovia	0.0284738
				Collinsella	0.0243845330251319					Psychrobacter	0.27575243574228			AKYG1722_fa	0.000482567	Nocardioidaceae_unclassified	0.0125467					Alloscardovia	0.000482607
				Coriobacteriaceae_unclassified	0.162081421538298					Pseudomonadaceae_unclassified	0.0227680813960612			JG30-KF-CM45_fa	0.1052	Nocardioides	0.0419834					Bifidobacteriaceae_unclassified	0.0337825
				Enorma	0.169330417399224					Pseudomonas	0.00966537386619038			Sphaerobacteraceae	0.000482567	Luteococcus	0.000965135					Bifidobacterium	0.083491
				Enterorhabdus	0.0000170164222087452					Thiopseudomonas	0.0000170165032855465			Ardenticatenales_fa	0.00193027	Marinilutecoccus	0.00193027					Gardnerella	0.00434346
				Gordonibacter	0.000136131377669962					Pseudomonadales_unclassified	0.0000170165032855465			Caldilineaceae	0.0014477	Propionibacteriaceae_unclassified	0.0574255					Atopobium	0.00289564
				Olsenella	0.375041945480745					Methylophaga	0.000170165032855465			Chloroflexaceae	0.000965135	Propionibacterium	0.00434311					Paraeggerthella	0.000482607
				Senegalimassilia	0.00343731728616653					Stenotrophomonas	0.0000510495098566394			Chloroflexales_unclassified	0.000482567	Propioniciclava	0.000482567					Senegalimassilia	0.000965214
				Slackia	0.0258649617572927					Wohlfahrtiimonas	0.000119115522998825			FFCH7168	0.000482567	Tessaracoccus	0.0337797					Slackia	0.0357129
				MB-A2-108_ge	0.0000170164222087452					Xanthomonadaceae_unclassified	0.015008555897852			AKIW781	0.000482567	Propionibacteriales_unclassified	0.00193027					Collinsella	0.758658
				Nitriliruptoraceae_unclassified	0.0000340328444174904					Xanthomonas	0.0000170165032855465			Gitt-GS-136_fa	0.0014477	Actinomycetospora	0.0028954					Coriobacteriaceae_unclassified	0.532315
				Elev-16S-1332_ge	0.0000510492666262356					Ignatzschineria	0.0113159746848884			KD4-96_fa	0.000482567	Pseudonocardia	0.00241284					Coriobacterium	0.00193043
				Patulibacter	0.000119114955461217					Luteimonas	0.000255247549283197			C0119_fa	0.0014477	Pseudonocardiaceae_unclassified	0.00241284					Eggerthella	0.000482607
				Solirubrobacter	0.0000340328444174904					Lysobacter	0.0000510495098566394			Ktedonobacterales_unclassified	0.000482567	Saccharomonospora	0.00193027					Gordonibacter	0.00193043
				TM146_ge	0.0000170164222087452					Pseudofulvimonas	0.0000850825164277323			SBR2076_fa	0.000482567	Saccharopolyspora	0.00241284					Olsenella	0.42759
				Victivallaceae_ge	0.000136131377669962					Marinobacter	0.0000680660131421858					Kitasatospora	0.000482567					Gaiella	0.00482607
				Victivallaceae_unclassified	0.0000850821110437261					Aliidiomarina	0.000323313562425383					Streptomyces	0.017855					Nitriliruptor	0.00434346
				Victivallis	0.00039137771080114					Citrobacter	0.0000170165032855465					Streptomycetaceae_unclassified	0.00579081					Conexibacter	0.000482607
				Victivallales_unclassified	0.000221213488713688					Enterobacteriaceae_unclassified	1.82505401038143					Allosalinactinospora	0.0159247					Patulibacter	0.00627389
				vadinBE97_ge	0.000221213488713688					Escherichia/Shigella	0.0294385506839954					Nocardiopsaceae_unclassified	0.213295					Solirubrobacter	0.00386085
				Nitrospira	0.0000170164222087452					Morganella	0.0000340330065710929					Nocardiopsis	0.157799					Solirubrobacterales_unclassified	0.00386085
				Planctomycetaceae_unclassified	0.0000170164222087452					Pantoea	0.000102099019713279					Streptomonospora	0.000965135					Actinobacteria_unclassified	0.0101347
				Roseimaritima	0.0000510492666262356					Proteus	0.000306297059139836					Thermobifida	0.000965135					Thermoleophilum	0.000482607
				Alphaproteobacteria_unclassified	0.00081678826601977					Providencia	0.00028928055585429					Thermopolyspora	0.000482567					Geminicoccus_unclassified	0.00144782
				Brevundimonas	0.0000170164222087452					Salmonella	0.0000340330065710929					Streptosporangiales_unclassified	0.000482567					Alphaproteobacteria_unclassified	0.105208
				Aureimonas	0.000119114955461217					Gammaproteobacteria_unclassified	0.003114020101255					Actinomyces	0.064664					Asticcacaulis	0.00579128
				Phyllobacteriaceae_unclassified	0.000255246333131178					Proteobacteria_unclassified	0.010992661122463					Actinomycetaceae_ge	0.00386054					Brevundimonas	0.109552
				Kaistia	0.0000170164222087452					Brachyspira	0.0000170165032855465					Actinomycetaceae_unclassified	0.0217155					Caulobacter	0.00144782
				Neorhizobium	0.00035734486638365					Sphaerochaeta	0.000476462091995301					Arcanobacterium	0.00723851					Caulobacteraceae_unclassified	0.00289564
				Rhizobiaceae_unclassified	0.0000680656888349809					Spirochaetaceae_unclassified	0.0000680660131421858					Flaviflexus	0.123537					Phenylobacterium	0.00193043
				Rhizobiales_unclassified	0.000102098533252471					Cloacibacillus	0.0648839270277886					Mobiluncus	0.000482567					Aurantimonadaceae_unclassified	0.00434346
				Bosea	0.0000170164222087452					Jonquetella	0.000187181536141011					Trueperella	0.0159247					Aureimonas	0.00579128
				Brucellaceae_unclassified	0.000476459821844866					Synergistaceae_unclassified	0.0215088601529307					Varibaculum	0.0226807					Rhizobiales_unclassified	0.029439
				Falsochrobactrum	0.000935903221480987					Acholeplasma	0.0000850825164277323					Aeriscardovia	0.0308843					Ancylobacter	0.000965214
				Paenochrobactrum	0.000374361288592395					Mollicutes_unclassified	0.0000170165032855465					Bifidobacteriaceae_unclassified	0.0453613					Camelimonas	0.000965214
				Devosia	0.0000340328444174904					Mycoplasmataceae_unclassified	0.0000510495098566394					Bifidobacterium	0.0694897					Chelatococcus	0.00144782
				Hyphomicrobiaceae_unclassified	0.000442426977427376					Ureaplasma	0.0452979317461247					Bombiscardovia	0.000482567					Pseudochelatococcus	0.000482607
				Pelagibacterium	0.000204197066504943					Opitutae_unclassified	0.000799775654420683					Gardnerella	0.00434311					Afipia	0.000482607
				Methylobacterium	0.000204197066504943					Cerasicoccus	0.000102099019713279					Corynebacteriaceae_unclassified	2.007					Bosea	0.00530868
				Paracoccus	0.000340328444174904					Subdivision5_unclassified	0.000476462091995301					Corynebacterium	0.175654					Bradyrhizobiaceae_unclassified	0.00193043
				Rhodobacteraceae_unclassified	0.00233124984259809					Akkermansia	0.0190074341699554					Corynebacterium_1	5.04379					Bradyrhizobium	0.00289564
				Rubellimicrobium	0.0000170164222087452					Verrucomicrobiaceae_unclassified	0.0401929807604607					Lawsonella	0.00434311					Rhodopseudomonas	0.00337825
				Rhodospirillaceae_unclassified	0.000408394133009885					Bacteria_unclassified	0.421107406807418					Tomitella	0.000965135					Brucellaceae_unclassified	0.0183391
				Rhodospirillales_unclassified	0.0000510492666262356					Bacteroidetes_unclassified	0.814290731723254					Corynebacteriales_unclassified	0.224394					Falsochrobactrum	0.0197869
				Mitochondria_ge	0.0000170164222087452					Anaerorhabdus	0.00302893758482727					Dietzia	0.156352					Ochrobactrum	0.0260608
				Altererythrobacter	0.000102098533252471					Bacteroides	1.37141104929205					Mycobacterium	0.014477					Paenochrobactrum	0.0419868
				Sphingopyxis	0.0000340328444174904					Bacteroidales_unclassified	1.22159775436609					Gordonia	0.0115816					Pseudochrobactrum	0.0149608
				Sphingomonadales_unclassified	0.0000340328444174904					Acetobacteroides	0.0000850825164277323					Nocardiaceae_unclassified	0.000965135					Devosia	0.0371607
				Betaproteobacteria_unclassified	0.000272262755339923					Petrimonas	0.00413501029838779					Rhodococcus	0.00723851					Hyphomicrobiaceae_unclassified	0.00434346
				Parapusillimonas	0.0000340328444174904					Porphyromonadaceae_unclassified	0.409314970030534					Williamsia	0.000965135					Pelagibacterium	0.000965214
				Pusillimonas	0.000119114955461217					Porphyromonas	0.0255417714316052					Jatrophihabitans	0.0014477					Rhodoplanes	0.00144782
				Sutterella	0.0721836630094972					Barnesiella	0.056579873424442					Frankiales_unclassified	0.000482567					Methylobacteriaceae_unclassified	0.00144782
				Verticia	0.0000170164222087452					Butyricimonas	0.00445832386081317					Blastococcus	0.00530824					Methylobacterium	0.027026
				Alcaligenaceae_unclassified	0.00272262755339923					Coprobacter	0.0370789606592057					Geodermatophilaceae_unclassified	0.000482567					Microvirga	0.00144782
				Oligella	0.00211003635388441					Dysgonomonas	0.000102099019713279					Geodermatophilus	0.00241284					Psychroglaciecola	0.000965214
				Paenalcaligenes	0.0174588491861726					Odoribacter	0.00775952549820918					Modestobacter	0.00241284					Hansschlegelia	0.000482607
				Burkholderiales_unclassified	0.00127623166565589					Parabacteroides	0.0102099019713279					Nakamurella	0.00482567					Aquamicrobium	0.00386085
				Comamonadaceae_unclassified	0.000629607621723573					Alloprevotella	0.0000340330065710929					uncultured	0.00193027					Mesorhizobium	0.00144782
				Oxalobacter	0.000748722577184789					Paraprevotella	0.0283154614671493					uncultured_ge	0.0028954					Phyllobacteriaceae_unclassified	0.029439
				Oxalobacteraceae_unclassified	0.000221213488713688					Prevotella	0.128423550296019					Glycomyces	0.0173724					Kaistia	0.000482607
				Kingella	0.000119114955461217					Prevotellaceae_unclassified	0.0651732075836429					Glycomycetaceae_unclassified	0.000965135					Neorhizobium	0.00434346
				Neisseriaceae_unclassified	0.0000680656888349809					Alistipes	0.201713629946868					Kineococcus	0.00868621					Rhizobiaceae_unclassified	0.00337825
				Rhodocyclaceae_unclassified	0.0010550181769422					Rikenella	0.00770847598835254					Kineosporiaceae_unclassified	0.000482567					Rhizobium	0.00627389
				OM27_clade	0.0000340328444174904					Rikenellaceae_unclassified	0.0000680660131421858					Quadrisphaera	0.000482567					Shinella	0.00193043
				Bradymonas	0.0000850821110437261					Cyclobacteriaceae_unclassified	0.000408396078853115					Beutenbergiaceae_unclassified	0.000482567					Amaricoccus	0.000482607
				Deltaproteobacteria_unclassified	0.00646624043932318					Salinirepens	0.0000170165032855465					Salana	0.00530824					Gemmobacter	0.00337825
				Bilophila	0.00537718941796349					Flavobacteriaceae_unclassified	0.0167612557362633					Jonesia	0.00579081					Paracoccus	0.111965
				Desulfovibrio	0.248252583603384					Flavobacterium	0.000799775654420683					Agrococcus	0.00337797					Puniceibacterium	0.000482607
				Desulfovibrionaceae_unclassified	0.00165059295424829					Myroides	0.00350539967682257					Microbacteriaceae_unclassified	0.37592					Rhodobacteraceae_unclassified	0.127408
				Lawsonia	0.000731706154976044					Taibaiella	0.0000340330065710929					Microbacterium	0.0135119					Rubellimicrobium	0.00193043
				Desulfovibrionales_unclassified	0.0000680656888349809					Balneola	0.000102099019713279					Plantibacter	0.000482567					Acetobacteraceae_unclassified	0.0115826
				Myxococcales_unclassified	0.0000170164222087452					Sphingobacteriaceae_unclassified	0.000884858170848416					Pseudoclavibacter	0.0014477					Acidisoma	0.00289564
				Campylobacter	0.000238229910922433					Sphingobacterium	0.0114180737046017					Rathayibacter	0.00241284					Gluconobacter	0.000965214
				Helicobacter	0.0167271430311965					Sphingobacteriales_unclassified	0.00158253480555582					Amnibacterium	0.000482567					Roseomonas	0.0207521
				Helicobacteraceae_unclassified	0.0000340328444174904					Candidatus_Saccharibacteria_unclassified	0.00893366422491189					Clavibacter	0.0014477					Azospirillum	0.000965214
				Gammaproteobacteria_unclassified	0.00529210730691976					Chlamydophila	0.00228021144026322					Cryobacterium	0.0014477					Constrictibacter	0.000482607
				Halomonadaceae_unclassified	0.000374361288592395					Caldilineaceae_unclassified	0.0000170165032855465					Curtobacterium	0.0014477					Rhodospirillaceae_unclassified	0.0101347
				Halomonas	0.00789561990485778					Chloroflexi_unclassified	0.0144980607992856					Frondihabitans	0.000965135					Skermanella	0.000965214
				Marinospirillum	0.0000340328444174904					Sphaerobacteraceae_unclassified	0.0024163434665476					Galbitalea	0.000965135					Rhodospirillales_unclassified	0.00241303
				Oceanobacter	0.000204197066504943					Thermomicrobia_unclassified	0.0000850825164277323					Leifsonia	0.000965135					Rickettsia	0.000965214
				Avibacterium	0.000493476244053611					Mucispirillum	0.00182076585155347					Leucobacter	0.167451					Altererythrobacter	0.00289564
				Gallibacterium	1.6066395356831											Citricoccus	0.0376402					Croceicoccus	0.000482607
				Pasteurellaceae_unclassified	0.000697673310558554											Rothia	0.109543					Erythrobacter	0.000965214
				Acinetobacter	0.0252864034021954											Yaniella	1.04862					Erythrobacteraceae_unclassified	0.0207521
				Moraxella	0.0000680656888349809											Enteractinococcus	0.0854144					Blastomonas	0.00144782
				Moraxellaceae_unclassified	0.000187180644296197											Glutamicibacter	0.0482567					Sphingosinicella	0.000965214
				Psychrobacter	0.275580957670629											Kocuria	0.0728677					Novosphingobium	0.0289564
				Azomonas	0.0000170164222087452											Micrococcaceae_unclassified	0.431898					Rhizorhabdus	0.000482607
				Oblitimonas	0.0130005465674813											Micrococcus	0.0733502					Sandaracinobacter	0.000965214
				Pseudomonadaceae_unclassified	0.00435620408543877											Nesterenkonia	0.0497044					Sphingobium	0.0101347
				Pseudomonas	0.00667043750582812											Paeniglutamicibacter	0.00772108					Sphingomonadaceae_unclassified	0.0415042
				Thiopseudomonas	0.00580259997318212											Pseudarthrobacter	0.00241284					Sphingomonas	0.123547
				Methylophaga	0.000136131377669962											Timonella	0.00193027					Sphingopyxis	0.0111
				Piscirickettsiaceae_unclassified	0.0000340328444174904											Micrococcales_unclassified	0.781759					Sphingorhabdus	0.000482607
				Stenotrophomonas	0.0000510492666262356											Cellulosimicrobium	0.000482567					Sphingomonadales_unclassified	0.00868692
				Wohlfahrtiimonas	0.000119114955461217											Promicromonospora	0.00193027					Betaproteobacteria_unclassified	0.0704606
				Xanthomonadaceae_unclassified	0.014225728966511											Promicromonosporaceae_unclassified	0.000965135					Achromobacter	0.00386085
				Xanthomonas	0.0000170164222087452											Haloactinobacterium	0.00193027					Advenella	0.00530868
				Ignatzschineria	0.0122007747236703											Ruania	0.0135119					Alcaligenaceae_unclassified	0.0974866
				Luteimonas	0.0000680656888349809											Ruaniaceae_unclassified	0.0028954					Alcaligenes	0.00820432
				Lysobacter	0.0000510492666262356											Sanguibacter	0.00579081					Bordetella	0.00144782
				Pseudofulvimonas	0.0000850821110437261											Bogoriella	0.00723851					Castellaniella	0.000965214
				Aeromonadaceae_unclassified	0.0000680656888349809											Bogoriellaceae_unclassified	0.0014477					Oligella	0.0275086
				Oceanimonas	0.0000170164222087452											Georgenia	0.00820364					Paenalcaligenes	0.143817
				Oceanisphaera	0.0900679227508884											Brevibacteriaceae_unclassified	0.0168899					Pusillimonas	0.00772171
				Succinatimonas	0.000901870377063496											Brevibacterium	0.868621					Burkholderia	0.00241303
				Marinobacter	0.0000680656888349809											Actinotalea	0.00241284					Burkholderiaceae_unclassified	0.000482607
				Aliidiomarina	0.000323312021966159											Cellulomonadaceae_unclassified	0.000482567					Cupriavidus	0.00482607
				Cellvibrionaceae_unclassified	0.0000340328444174904											Cellulomonas	0.00193027					Lautropia	0.0072391
				Marinimicrobium	0.000306295599757414											Demequina	0.000965135					Limnobacter	0.000482607
				C1-B045	0.0000340328444174904											Demequinaceae_unclassified	0.0014477					Ralstonia	0.000965214
				Morganella	0.0000340328444174904											Brachybacterium	7.62022					Aquabacterium	0.0101347
				Proteus	0.000255246333131178											Dermabacter	0.000965135					Tepidimonas	0.0168912
				Providencia	0.000272262755339923											Dermabacteraceae_unclassified	0.131258					Burkholderiales_unclassified	0.0796301
				Pseudocitrobacter	0.000102098533252471											Helcobacillus	0.0299192					Acidovorax	0.000965214
				Enterobacteriaceae_unclassified	0.0317356274193098											Dermacoccaceae_ge	0.000482567					Simplicispira	0.00144782
				Escherichia-Shigella	1.82239075286778											Dermacoccaceae_unclassified	0.0101339					Comamonadaceae_unclassified	0.0839736
				Klebsiella	0.0000510492666262356											Flexivirga	0.00241284					Comamonas	0.040539
				Proteobacteria_unclassified	0.00265456186456425											Kytococcus	0.0101339					Delftia	0.000482607
				Saccharibacteria_ge	0.00561541932888592											Dermatophilaceae_unclassified	0.00193027					Hydrogenophaga	0.00386085
				Candidatus_Saccharimonas	0.00878047385971253											Kineosphaera	0.000482567					Polaromonas	0.00193043
				Brachyspira	0.0000170164222087452											Mobilicoccus	0.000482567					Pseudorhodoferax	0.00193043
				Sphaerochaeta	0.000697673310558554											Intrasporangiaceae_unclassified	0.156834					Ramlibacter	0.00144782
				Spirochaetaceae_unclassified	0.0000170164222087452											Tetrasphaera	0.000482567					Schlegelella	0.0072391
				Treponema_2	0.0000340328444174904											Janibacter	0.00434311					Duganella	0.00386085
				Jonquetella	0.0217129547383589											Ornithinicoccus	0.000965135					Herbaspirillum	0.00144782
				Synergistes	0.0651728970594942											Ornithinimicrobium	0.0304017					Janthinobacterium	0.000965214
				Acholeplasma	0.0000170164222087452											Oryzihumus	0.000965135					Massilia	0.0386085
				Mollicutes_RF9_ge	0.200555552152271											Phycicoccus	0.000965135					Oxalicibacterium	0.000482607
				Mollicutes_unclassified	0.000476459821844866											Terrabacter	0.000965135					Oxalobacter	0.000482607
				Mycoplasmataceae_unclassified	0.000459443399636121											Actinobacteria_unclassified	0.0299192					Oxalobacteraceae_unclassified	0.0265434
				Ureaplasma	0.0450424695865486											Atopobium	0.00820364					Undibacterium	0.000482607
				NB1-n_ge	0.000102098533252471											Collinsella	0.00965135					Parasutterella	0.28136
				Opitutae_unclassified	0.000119114955461217											Coriobacteriaceae_unclassified	0.852696					Sutterella	0.0188217
				Opitutae_vadinHA64_ge	0.00081678826601977											Enorma	0.454096					Sutterellaceae_unclassified	0.00482607
				Akkermansia	0.0592001328642246											Enterorhabdus	0.000965135					Hydrogenophilus	0.00772171
				WCHB1-41_ge	0.000663640466141063											Gordonibacter	0.0014477					Tepidiphilus	0.00241303
				Bacteria_unclassified	0.258564535461884											Olsenella	0.372059					Methylobacillus	0.000965214
				Bacteroidetes_unclassified	0.16774789013381											Senegalimassilia	0.0231632					Methylophilaceae_unclassified	0.000482607
				Bacteroides	1.5973145363127											Slackia	0.03571					Methylophilus	0.00193043
				uncultured_ge	0.0332330725736794											Egicoccus	0.000482567					Gulbenkiania	0.000482607
				Bacteroidales_BS11_gut_group_ge	0.0334372696401843											Nitriliruptoraceae_unclassified	0.00386054					Kingella	0.00241303
				Bacteroidales_S24-7_group_ge	0.162728045582231											Gaiella	0.00193027					Neisseria	0.00434346
				Bacteroidales_unclassified	0.487537512702759											Gaiellales_unclassified	0.0014477					Neisseriaceae_unclassified	0.0164086
				Barnesiella	0.0565796038440778											Elev-16S-1332_ge	0.00193027					Nitrosomonas	0.00434346
				Porphyromonadaceae_unclassified	0.190192551027145											Patulibacter	0.00675594					Nitrosospira	0.00241303
				Porphyromonas	0.0255416497353266											Solirubrobacter	0.00434311					Azoarcus	0.00289564
				Proteiniphilum	0.00362449793046273											Solirubrobacterales_unclassified	0.0014477					Azospira	0.00289564
				Butyricimonas	0.00452636830752623											TM146_ge	0.00434311					Dechloromonas	0.000965214
				Coprobacter	0.000187180644296197											YNPFFP1_ge	0.000482567					Rhodocyclaceae_unclassified	0.0246129
				Dysgonomonas	0.000102098533252471											Thermoleophilia_unclassified	0.0014477					Thauera	0.000482607
				Odoribacter	0.00131026451007338											Thermoleophilum	0.000482567					Zoogloea	0.00289564
				Parabacteroides	0.107186443492886											IheB3-7_ge	0.000482567					Peredibacter	0.00772171
				Petrimonas	0.000629607621723573											Lentisphaerae_unclassified	0.000482567					Bdellovibrio	0.0120652
				Alloprevotella	0.0132047436339863											Victivallaceae_ge	0.0429485					Vampirovibrio	0.000965214
				Prevotellaceae_NK3B31_group	0.0000340328444174904											Victivallaceae_unclassified	0.0294366					Bradymonas	0.0188217
				Prevotellaceae_UCG-001	0.0779352137160531											Victivallis	0.0270238					Deltaproteobacteria_unclassified	0.00289564
				Prevotellaceae_unclassified	0.0380146872143368											Victivallales_unclassified	0.00868621					Bilophila	0.0246129
				Paraprevotella	0.00519000877366729											vadinBE97_ge	0.0395705					Desulfovibrio	0.402977
				Prevotella	0.0000170164222087452											Z20	0.000482567					Desulfovibrionaceae_unclassified	0.0400564
				Prevotella_9	0.0000170164222087452											Nitrospira	0.0014477					Lawsonia	0.00530868
				Prevotellaceae_Ga6A1_group	0.0436301065432227											Candidatus_Falkowbacteria_ge	0.000482567					Desulfovibrionales_unclassified	0.11486
				Alistipes	0.268297928965286											Parcubacteria_ge	0.000482567					Geobacter	0.00144782
				Rikenella	0.00969936065898477											OM190_ge	0.000482567					Cystobacter	0.000965214
				Rikenellaceae_RC9_gut_group	0.673356843222257											Phycisphaerae_unclassified	0.000482567					Cystobacteraceae_unclassified	0.000482607
				Rikenellaceae_unclassified	0.0365853077488022											Phycisphaeraceae_unclassified	0.0014477					Myxococcus	0.000482607
				Bacteroidia_unclassified	0.133970292049451											Tepidisphaeraceae_ge	0.00434311					Myxococcales_unclassified	0.00868692
				Mariniradius	0.00035734486638365											Gemmata	0.000965135					Nannocystaceae_unclassified	0.000965214
				Brumimicrobium	0.0000170164222087452											Isosphaera	0.00627337					Minicystis	0.000482607
				Aequorivita	0.000255246333131178											Pir4_lineage	0.00193027					Polyangiaceae_unclassified	0.000482607
				Flavobacteriaceae_unclassified	0.003539415819419											Planctomyces	0.00434311					Vulgatibacter	0.000482607
				Flavobacterium	0.000799771843811025											Planctomycetaceae_unclassified	0.00482567					Arcobacter	0.0173738
				Moheibacter	0.000170164222087452											Rhodopirellula	0.00193027					Campylobacter	0.0120652
				Myroides	0.00350538297500151											Roseimaritima	0.0028954					Helicobacter	0.0221999
				Ulvibacter	0.0129154644564376											Singulisphaera	0.00193027					Aeromonadaceae_unclassified	0.00627389
				Taibaiella	0.0000340328444174904											p-1088-a5_gut_group	0.0028954					Aeromonas	0.00482607
				Sphingobacterium	0.00610889557293953											Planctomycetes_unclassified	0.000965135					Oceanimonas	0.00289564
				Pedobacter	0.0000850821110437261											Alphaproteobacteria_Incertae_Sedis_unclassified	0.0014477					Oceanisphaera	0.174704
				Sphingobacteriaceae_unclassified	0.00580259997318212											Alphaproteobacteria_unclassified	0.148631					Tolumonas	0.000482607
				Sphingobacteriales_unclassified	0.0000170164222087452											Asticcacaulis	0.00579081					Anaerobiospirillum	0.00434346
				Chlamydia	0.00228020057597186											Brevundimonas	0.0907226					Succinatimonas	0.0188217
				JG30-KF-CM45_ge	0.0220702996047425											Caulobacter	0.0014477					Succinivibrio	0.00193043
				Nitrolancea	0.0000170164222087452											Caulobacteraceae_unclassified	0.0236458					Alcanivorax	0.015926
				Chloroflexi_unclassified	0.0000170164222087452											Hirschia	0.000482567					Halomonadaceae_unclassified	0.00337825
																Aurantimonadaceae_unclassified	0.00579081					Halomonas	0.0535694
																Aureimonas	0.00386054					Marinomonas	0.00868692
																Aliihoeflea	0.000965135					Marinospirillum	0.013513
																Aminobacter	0.00193027					Pseudohongiella	0.00579128
																Phyllobacteriaceae_ge	0.000482567					Oceanospirillales_unclassified	0.000482607
																Phyllobacteriaceae_unclassified	0.0318494					Orbaceae_unclassified	0.0067565
																Pseudaminobacter	0.000482567					Avibacterium	0.029439
																Thermovum	0.0014477					Gallibacterium	0.239856
																Kaistia	0.000482567					Haemophilus	0.00193043
																Neorhizobium	0.00723851					Mannheimia	0.00337825
																Rhizobiaceae_unclassified	0.00193027					Pasteurellaceae_unclassified	0.0443998
																Rhizobium	0.00193027					Acinetobacter	1.69926
																Shinella	0.00241284					Alkanindiges	0.00337825
																Agaricicola	0.000482567					Enhydrobacter	0.00579128
																Bauldia	0.000482567					Moraxella	0.0776997
																Nordella	0.0014477					Moraxellaceae_unclassified	0.0101347
																Phreatobacter	0.0028954					Paraperlucidibaca	0.00193043
																Rhizobiales_unclassified	0.0221981					Psychrobacter	0.259642
																Ancylobacter	0.000965135					Azotobacter	0.000482607
																Pseudolabrys	0.000965135					Cellvibrio	0.0670824
																Bartonella	0.00193027					Pseudomonadaceae_unclassified	0.222482
																Beijerinckiaceae_unclassified	0.000482567					Pseudomonas	0.305008
																Camelimonas	0.000965135					Thiopseudomonas	0.0106174
																Chelatococcus	0.000482567					Methylophaga	0.0144782
																Afipia	0.000482567					Piscirickettsiaceae_unclassified	0.00193043
																Bosea	0.00530824					Thioalkalimicrobium	0.000965214
																Bradyrhizobiaceae_unclassified	0.00579081					Photobacterium	0.000965214
																Bradyrhizobium	0.000482567					Vibrio	0.00965214
																Rhodopseudomonas	0.0014477					Vibrionaceae_unclassified	0.000965214
																Tardiphaga	0.000482567					Alkanibacter	0.000482607
																Brucellaceae_unclassified	0.0443962					Fontimonas	0.00193043
																Falsochrobactrum	0.0255761					Nevskia	0.00482607
																Ochrobactrum	0.0226807					Povalibacter	0.000482607
																Paenochrobactrum	0.0188201					Sinobacteraceae_unclassified	0.000482607
																Pseudochrobactrum	0.0115816					Solimonas	0.000482607
																Devosia	0.0217155					Steroidobacter	0.000965214
																Hyphomicrobiaceae_unclassified	0.0120642					Arenimonas	0.00144782
																Pedomicrobium	0.000482567					Rhodanobacter	0.00289564
																Pelagibacterium	0.00820364					Stenotrophomonas	0.067565
																Rhodoplanes	0.000482567					Vulcaniibacterium	0.000482607
																JG34-KF-361_ge	0.000482567					Wohlfahrtiimonas	0.426142
																Methylobacteriaceae_unclassified	0.00193027					Xanthomonadaceae_unclassified	0.0820432
																Methylobacterium	0.0270238					Xanthomonas	0.000965214
																Microvirga	0.0014477					Dokdonella	0.00144782
																Psychroglaciecola	0.000482567					Dyella	0.000965214
																Methylocystaceae_unclassified	0.000482567					Ignatzschineria	0.332516
																Cereibacter	0.0014477					Luteibacter	0.00289564
																Pannonibacter	0.000965135					Luteimonas	0.0506737
																Paracoccus	0.061286					Lysobacter	0.0130304
																Rhodobacteraceae_unclassified	0.179515					Pseudofulvimonas	0.000965214
																Roseovarius	0.000482567					Pseudoxanthomonas	0.0106174
																Rubellimicrobium	0.00337797					Alishewanella	0.00772171
																Thioclava	0.000482567					Marinobacter	0.0067565
																Acetobacteraceae_unclassified	0.00916878					Alteromonadales_incertae_sedis_unclassified	0.00241303
																Acidiphilium	0.0014477					Aliidiomarina	0.0067565
																Belnapia	0.000965135					Idiomarina	0.00386085
																Craurococcus	0.00193027					Pseudoalteromonas	0.000482607
																Endobacter	0.000965135					Shewanella	0.00965214
																Gluconobacter	0.000965135					Cardiobacteriaceae_unclassified	0.00820432
																Roseococcus	0.000482567					Cardiobacterium	0.000482607
																Roseomonas	0.0197853					Suttonella	0.00579128
																Zavarzinia	0.000482567					Rheinheimera	0.0357129
																DA111_ge	0.0014477					Citrobacter	0.00144782
																Azospirillum	0.000965135					Tatumella	0.00144782
																Defluviicoccus	0.000482567					Enterobacteriaceae_unclassified	0.128373
																Rhodospirillaceae_unclassified	0.0583906					Escherichia/Shigella	0.0419868
																Skermanella	0.000965135					Kosakonia	0.000482607
																Candidatus_Alysiosphaera	0.000965135					Morganella	0.013513
																Geminicoccus	0.0014477					Pantoea	0.00820432
																Rhodospirillales_unclassified	0.00868621					Proteus	0.0130304
																Mitochondria_ge	0.0347448					Providencia	0.0154434
																Rickettsia	0.000965135					Salmonella	0.00627389
																Rickettsiaceae_unclassified	0.00579081					Gilvimarinus_unclassified	0.0130304
																Candidatus_Hepatincola	0.0014477					Marinicella_unclassified	0.000482607
																Constrictibacter	0.000482567					Gammaproteobacteria_unclassified	0.0965214
																Rickettsiales_ge	0.000482567					Diplorickettsia	0.00144782
																Rickettsiales_unclassified	0.00965135					Legionella	0.00241303
																T9d_ge	0.000482567					Methylococcaceae_unclassified	0.000965214
																7B-8_ge	0.000965135					Proteobacteria_unclassified	0.265434
																Ellin6055_ge	0.000965135					SR1_unclassified	0.00241303
																Altererythrobacter	0.0159247					Sphaerochaeta	0.00482607
																Croceicoccus	0.000482567					Spirochaetaceae_unclassified	0.00627389
																Erythrobacter	0.000965135					Treponema	0.0101347
																Erythrobacteraceae_unclassified	0.00772108					Cloacibacillus	0.0714258
																JG34-KF-161_ge	0.0014477					Jonquetella	0.00241303
																Blastomonas	0.0014477					Pyramidobacter	0.000482607
																Sphingorhabdus	0.000965135					Synergistaceae_unclassified	0.0106174
																Sphingosinicella	0.000965135					Synergistes	0.000482607
																Zymomonas	0.00579081					Acholeplasma	0.0188217
																Novosphingobium	0.021233					Spiroplasma	0.000482607
																Polymorphobacter	0.000482567					Ureaplasma	0.00289564
																Rhizorhapis	0.000482567					Fervidobacterium	0.000482607
																Sandaracinobacter	0.000482567					Opitutae_unclassified	0.00579128
																Sphingobium	0.00965135					Opitutus	0.00289564
																Sphingomonadaceae_unclassified	0.0260586					Cerasicoccus	0.0308868
																Sphingomonas	0.0926529					Puniceicoccaceae_unclassified	0.00772171
																Sphingopyxis	0.0115816					Spartobacteria_unclassified	0.00193043
																Sphingomonadales_unclassified	0.0574255					Subdivision3_unclassified	0.000482607
																Chitinivorax	0.000482567					Subdivision5_unclassified	0.00434346
																SC-I-84_ge	0.00241284					Verrucomicrobia_unclassified	0.00337825
																Betaproteobacteria_unclassified	0.046809					Akkermansia	0.0164086
																Achromobacter	0.00193027					Luteolibacter	0.00530868
																Parapusillimonas	0.00386054					Prosthecobacter	0.00144782
																Pusillimonas	0.0308843					Verrucomicrobiaceae_unclassified	0.0318521
																Sutterella	0.347931					Verrucomicrobium	0.00144782
																Verticia	0.0101339					candidate_division_WPS-1_unclassified	0.00241303
																Advenella	0.000482567					Armatimonadetes_gp5_unclassified	0.000965214
																Alcaligenaceae_unclassified	0.0767282					Armatimonadetes_gp7_unclassified	0.000482607
																Alcaligenes	0.00820364					Armatimonadetes_unclassified	0.000482607
																Bordetella	0.0014477					Bacteria_unclassified	6.18316
																Castellaniella	0.000965135					Bacteroidetes_unclassified	0.943014
																Kerstersia	0.000482567					Anaerorhabdus	0.0226825
																Oligella	0.0275063					Bacteroides	2.27211
																Paenalcaligenes	0.14284					Bacteroidales_unclassified	1.11723
																Burkholderia-Paraburkholderia	0.00241284					Marinilabiliaceae_unclassified	0.0111
																Burkholderiaceae_unclassified	0.000482567					Petrimonas	0.0265434
																Cupriavidus	0.00482567					Porphyromonadaceae_unclassified	0.704123
																Lautropia	0.00868621					Porphyromonas	0.0207521
																Limnobacter	0.00193027					Barnesiella	0.122582
																Ralstonia	0.000965135					Butyricimonas	0.0226825
																Burkholderiales_unclassified	0.00820364					Coprobacter	0.0632215
																Alicycliphilus	0.000482567					Dysgonomonas	0.0960388
																Polaromonas	0.000965135					Falsiporphyromonas	0.000965214
																Ramlibacter	0.000482567					Macellibacteroides	0.000482607
																Rhizobacter	0.0014477					Odoribacter	0.0231651
																Schlegelella	0.00772108					Parabacteroides	0.0612911
																Simplicispira	0.0014477					Alloprevotella	0.0164086
																Tepidicella	0.000482567					Paraprevotella	0.110517
																Tepidimonas	0.0135119					Prevotella	0.138991
																Xenophilus	0.00530824					Prevotellaceae_unclassified	0.0308868
																Aquabacterium	0.00434311					Alistipes	0.30549
																Comamonadaceae_unclassified	0.155387					Anaerocella	0.000482607
																Comamonas	0.00386054					Rikenella	0.0154434
																Delftia	0.00193027					Rikenellaceae_unclassified	0.00241303
																Hydrogenophaga	0.00193027					Algoriphagus	0.00241303
																Lampropedia	0.00386054					Cyclobacteriaceae_unclassified	0.0361955
																Limnohabitans	0.000965135					Cytophagaceae_unclassified	0.00289564
																Piscinibacter	0.000482567					Dyadobacter	0.0323347
																Duganella	0.00241284					Fibrella	0.00193043
																Herbaspirillum	0.000482567					Hymenobacter	0.0342651
																Janthinobacterium	0.00386054					Larkinella	0.000965214
																Massilia	0.0328146					Persicitalea	0.000482607
																Noviherbaspirillum	0.000965135					Pontibacter	0.000965214
																Oxalobacter	0.00820364					Rhodocytophaga	0.00144782
																Oxalobacteraceae_unclassified	0.0236458					Spirosoma	0.00482607
																Undibacterium	0.000482567					Cytophagales_unclassified	0.00627389
																Hot_Creek_32_ge	0.000482567					Flammeovirgaceae_unclassified	0.000965214
																Hydrogenophilus	0.00772108					Ohtaekwangia_unclassified	0.00193043
																Tepidiphilus	0.00241284					Brumimicrobium	0.00386085
																Thiobacillus	0.0014477					Cryomorpha	0.00144782
																Methylobacillus	0.000965135					Cryomorphaceae_unclassified	0.0361955
																Methylophilaceae_unclassified	0.000482567					Salinirepens	0.000482607
																Methylophilus	0.000965135					Aequorivita	0.0072391
																Methylotenera	0.000965135					Flavobacteriaceae_unclassified	0.35182
																Kingella	0.00772108					Flavobacterium	0.156365
																Neisseria	0.00386054					Galbibacter	0.00337825
																Neisseriaceae_unclassified	0.0120642					Gelidibacter	0.0139956
																Nitrosomonadaceae_unclassified	0.000965135					Gillisia	0.000965214
																Nitrosomonas	0.00337797					Myroides	0.194008
																Nitrosospira	0.00241284					Ornithobacterium	0.0154434
																12up	0.000482567					Riemerella	0.134165
																Azoarcus	0.0014477					Salegentibacter	0.000482607
																Azospira	0.00193027					Soonwooa	0.00193043
																Methyloversatilis	0.00434311					Arenibacter	0.00289564
																Rhodocyclaceae_unclassified	0.0221981					Vitellibacter	0.000482607
																Thauera	0.00337797					Weeksella	0.0101347
																Zoogloea	0.0028954					Bergeyella	0.00434346
																Peredibacter	0.00772108					Chishuiella	0.0526041
																Bdellovibrio	0.0130293					Chryseobacterium	0.124513
																OM27_clade	0.00193027					Cloacibacterium	0.0101347
																Bradymonas	0.0197853					Elizabethkingia	0.00289564
																Bradymonadales_ge	0.000482567					Empedobacter	0.106656
																Bradymonadales_unclassified	0.000965135					Epilithonimonas	0.00482607
																Deltaproteobacteria_unclassified	0.0164073					Flavobacteriales_unclassified	0.0115826
																Bilophila	0.0246109					Arachidicoccus	0.00241303
																Desulfovibrio	0.557848					Sediminibacterium	0.000482607
																Desulfovibrionaceae_unclassified	0.0371577					Segetibacter	0.000482607
																Lawsonia	0.00530824					Taibaiella	0.00627389
																Desulfovibrionales_unclassified	0.00916878					Terrimonas	0.00241303
																H16	0.000965135					Balneola	0.013513
																Desulfuromonadales_unclassified	0					Chitinophaga	0.00241303
																Geobacter	0.0014477					Chitinophagaceae_unclassified	0.0241303
																Anaeromyxobacter	0.000482567					Ferruginibacter	0.000482607
																Sandaracinaceae_unclassified	0.000965135					Flavisolibacter	0.00289564
																Sandaracinus	0.000482567					Flavitalea	0.000482607
																Vulgatibacter	0.000482567					Niastella	0.000482607
																mle1-27_ge	0.000482567					Parasegetibacter	0.000482607
																BIrii41_ge	0.000482567					Rhodothermaceae_unclassified	0.000965214
																Haliangium	0.0014477					Haliscomenobacter	0.000482607
																Myxococcus	0.000482567					Arcticibacter	0.00434346
																Myxococcales_unclassified	0.00386054					Mucilaginibacter	0.00386085
																Nannocystis	0.000482567					Olivibacter	0.000965214
																Pseudenhygromyxa	0.000482567					Parapedobacter	0.00241303
																P3OB-42_ge	0.000965135					Pedobacter	0.081078
																Phaselicystis	0.000482567					Sphingobacteriaceae_unclassified	0.0936257
																Aetherobacter	0.000482567					Sphingobacterium	0.284255
																Polyangiaceae_unclassified	0.000482567					Sphingobacteriales_unclassified	0.0115826
																Sorangium	0.000482567					Candidatus_Saccharibacteria_unclassified	0.126926
																NB1-j_ge	0.000482567					Chlamydiaceae_unclassified	0.000482607
																0319-6G20_ge	0.000965135					Chlamydophila	0.00579128
																Oligoflexaceae_ge	0.00193027					Chlamydiales_unclassified	0.00772171
																Oligoflexaceae_unclassified	0.000965135					Neochlamydia	0.00241303
																Arcobacter	0.0173724					Parachlamydia	0.000482607
																Campylobacter	0.0120642					Parachlamydiaceae_unclassified	0.00289564
																Helicobacter	0.021233					Leptolinea	0.000482607
																Helicobacteraceae_unclassified	0.000965135					Caldilineaceae_unclassified	0.00144782
																195up_ge	0.000482567					Chloroflexi_unclassified	0.0246129
																Gammaproteobacteria_unclassified	0.079141					Ktedonobacter	0.000482607
																HTA4_ge	0.00193027					Sphaerobacteraceae_unclassified	0.0255782
																Rickettsiella	0.0014477					Thermomicrobia_unclassified	0.00241303
																Legionella	0.00241284					Mucispirillum	0.0284738
																Legionellales_unclassified	0.000482567
																Methylococcales_unclassified	0.000965135
																Alcanivorax	0.0125467
																Halomonadaceae_unclassified	0.0125467
																Halomonas	0.0443962
																Marinomonas	0.00868621
																Marinospirillum	0.0125467
																Nitrincola	0.000965135
																Oceanobacter	0.00723851
																Pseudohongiella	0.00627337
																Oceanospirillales_unclassified	0.00434311
																Orbaceae_unclassified	0.00627337
																Actinobacillus	0.000482567
																Avibacterium	0.0361925
																Gallibacterium	0.239836
																Haemophilus	0.00193027
																Mannheimia	0.00241284
																Pasteurellaceae_unclassified	0.0381228
																Acinetobacter	1.69526
																Alkanindiges	0.0101339
																Enhydrobacter	0.00579081
																Moraxella	0.0781759
																Moraxellaceae_unclassified	0.00868621
																Perlucidibaca	0.00193027
																Psychrobacter	0.255278
																Azotobacter	0.000482567
																Oblitimonas	0.0130293
																Pseudomonadaceae_ge	0.0149596
																Pseudomonadaceae_unclassified	0.12788
																Pseudomonas	0.264447
																Thiopseudomonas	0.0960309
																Methylophaga	0.0135119
																Piscirickettsiaceae_unclassified	0.00337797
																Photobacterium	0.000965135
																Vibrio	0.00916878
																Vibrionaceae_unclassified	0.0014477
																KCM-B-112_ge	0.000965135
																Alkanibacter	0.000482567
																Nevskia	0.00482567
																Fontimonas	0.00241284
																Arenimonas	0.0014477
																Pseudoxanthomonas	0.0106165
																Rhodanobacter	0.0028954
																Stenotrophomonas	0.0699723
																Thermomonas	0.00916878
																Vulcaniibacterium	0.000482567
																Wohlfahrtiimonas	0.0419834
																Xanthomonadaceae_unclassified	0.0805887
																Xanthomonas	0.000965135
																Xylella	0.000965135
																Dokdonella	0.00482567
																Frateuria	0.000482567
																Ignatzschineria	0.352274
																Koukoulia	0.361443
																Luteibacter	0.0028954
																Luteimonas	0.0342623
																Lysobacter	0.0183376
																Pseudofulvimonas	0.000965135
																Acidibacter	0.00241284
																Steroidobacter	0.00193027
																Aeromonas	0.00386054
																Oceanimonas	0.0028954
																Oceanisphaera	0.18241
																Tolumonas	0.000482567
																Anaerobiospirillum	0.000482567
																Succinatimonas	0.0188201
																Succinivibrio	0.00193027
																Succinivibrionaceae_UCG-001	0.0014477
																Succinivibrionaceae_unclassified	0.000965135
																Alishewanella	0.0164073
																Marinobacter	0.00675594
																Aliidiomarina	0.00675594
																Idiomarina	0.00386054
																Pseudoalteromonas	0.000482567
																Shewanella	0.00965135
																Cardiobacteriaceae_unclassified	0.0139945
																Cardiobacterium	0.000482567
																Aestuariicella	0.00241284
																Cellvibrio	0.064664
																Cellvibrionaceae_unclassified	0.0226807
																Gilvimarinus	0.000965135
																Marinimicrobium	0.00482567
																Simiduia	0.000965135
																Cellvibrionales_unclassified	0.00241284
																C1-B045	0.00241284
																BD1-7_clade	0.000482567
																Rheinheimera	0.03571
																Cedecea	0.000965135
																Morganella	0.0135119
																Pantoea	0.000965135
																Proteus	0.00627337
																Providencia	0.0115816
																Sodalis	0.00193027
																Tatumella	0.000482567
																Cosenzaea	0.000965135
																Enterobacter	0.000965135
																Enterobacteriaceae_unclassified	0.170346
																Escherichia-Shigella	0.0197853
																Hafnia-Obesumbacterium	0.0014477
																Kosakonia	0.000482567
																Moellerella	0.000482567
																Marinicella	0.000482567
																Proteobacteria_unclassified	0.126915
																RsaHf231_ge	0.00241284
																SR1_(Absconditabacteria)_ge	0.00337797
																Saccharibacteria_ge	0.0892749
																Candidatus_Saccharimonas	0.0579081
																Sphaerochaeta	0.0202678
																Spirochaetaceae_unclassified	0.00193027
																Treponema_2	0.0106165
																Chthonomonas	0.000482567
																Fimbriimonadaceae_ge	0.000965135
																Fimbriimonadaceae_unclassified	0.000482567
																Jonquetella	0.0125467
																Synergistaceae_unclassified	0.000482567
																Synergistes	0.0719025
																TM6_(Dependentiae)_ge	0.000965135
																Acholeplasma	0.0159247
																Spiroplasma	0.000482567
																Haloplasma	0.000482567
																Mollicutes_RF9_ge	3.05224
																Mollicutes_unclassified	0.0164073
																Candidatus_Bacilloplasma	0.000965135
																Mycoplasmataceae_unclassified	0.0014477
																Ureaplasma	0.00241284
																NB1-n_ge	0.00579081
																Fervidobacterium	0.000482567
																OPB35_soil_group_ge	0.000482567
																Opitutae_unclassified	0.0226807
																Opitutae_vadinHA64_ge	0.0149596
																Opitutus	0.0028954
																Puniceicoccaceae_unclassified	0.0125467
																Chthoniobacter	0.000965135
																DA101_soil_group_ge	0.00193027
																Candidatus_Methylacidiphilum	0.000482567
																Verrucomicrobia_unclassified	0.0014477
																DEV007_ge	0.000482567
																Akkermansia	0.0443962
																Brevifollis	0.000482567
																Haloferula	0.0014477
																Luteolibacter	0.00530824
																Prosthecobacter	0.0014477
																Roseibacillus	0.000965135
																Verrucomicrobiaceae_unclassified	0.000965135
																Verrucomicrobium	0.000965135
																WCHB1-41_ge	0.0164073
																BJ-169_ge	0.000965135
																BRC1_ge	0.0028954
																Bacteria_unclassified	1.02546
																Bacteroidetes_unclassified	0.328628
																Bacteroides	2.60683
																p-2534-18B5_gut_group_ge	0.000482567
																Bacteroidales_BS11_gut_group_ge	0.0135119
																Bacteroidales_RF16_group_ge	0.0014477
																Bacteroidales_S24-7_group_ge	0.156352
																Bacteroidales_unclassified	0.68042
																Marinilabiaceae_ge	0.00241284
																Marinilabiaceae_unclassified	0.00916878
																Barnesiella	0.121607
																Porphyromonadaceae_unclassified	0.342623
																Porphyromonas	0.0197853
																Proteiniphilum	0.0752805
																Butyricimonas	0.0226807
																Coprobacter	0.00337797
																Dysgonomonas	0.11099
																Macellibacteroides	0.000482567
																Microbacter	0.000482567
																Odoribacter	0.00675594
																Parabacteroides	0.133671
																Petrimonas	0.0583906
																Alloprevotella	0.0250935
																Prevotellaceae_NK3B31_group	0.0284715
																Prevotellaceae_UCG-001	0.0588732
																Prevotellaceae_UCG-003	0.0028954
																Prevotellaceae_unclassified	0.0685246
																Paraprevotella	0.0849318
																Prevotella	0.00241284
																Prevotella_1	0.00386054
																Prevotella_2	0.00337797
																Prevotella_6	0.00386054
																Prevotella_7	0.0250935
																Prevotella_9	0.0193027
																Prevotellaceae_Ga6A1_group	0.0202678
																Alistipes	0.354204
																Anaerocella	0.0014477
																Rikenella	0.0260586
																Rikenellaceae_RC9_gut_group	0.241284
																Rikenellaceae_unclassified	0.122572
																dgA-11_gut_group	0.0028954
																Bacteroidia_unclassified	0.0694897
																Algoriphagus	0.00241284
																Cyclobacteriaceae_unclassified	0.00482567
																Mariniradius	0.0217155
																Adhaeribacter	0.000482567
																Persicitalea	0.00193027
																Pontibacter	0.000965135
																Rhodocytophaga	0.0014477
																Siphonobacter	0.000482567
																Spirosoma	0.00579081
																Cytophaga	0.000482567
																Cytophagaceae_unclassified	0.00193027
																Dyadobacter	0.032332
																Fibrella	0.00193027
																Hymenobacter	0.0342623
																Larkinella	0.000965135
																Leadbetterella	0.000482567
																Ohtaekwangia	0.00193027
																Candidatus_Cardinium	0.00723851
																Flammeovirgaceae_unclassified	0.000482567
																MWH-CFBk5_ge	0.00337797
																Cytophagia_unclassified	0.000482567
																Brumimicrobium	0.0250935
																Cryomorpha	0.0014477
																Cryomorphaceae_unclassified	0.0014477
																Fluviicola	0.0139945
																Aequorivita	0.0207504
																Epilithonimonas	0.00482567
																Flavobacteriaceae_unclassified	0.353722
																Flavobacterium	0.184823
																Galbibacter	0.00337797
																Gelidibacter	0.0193027
																Gillisia	0.000965135
																Moheibacter	0.0622512
																Myroides	0.194957
																Ornithobacterium	0.0173724
																Riemerella	0.000482567
																Apibacter	0.000965135
																Salegentibacter	0.000482567
																Salinimicrobium	0.000482567
																Soonwooa	0.00193027
																Ulvibacter	0.0550127
																Vitellibacter	0.000482567
																Weeksella	0.000482567
																Arenibacter	0.00337797
																Bergeyella	0.0246109
																Chishuiella	0.0487393
																Chryseobacterium	0.120159
																Cloacibacterium	0.0101339
																Elizabethkingia	0.0028954
																Empedobacter	0.0830016
																NS9_marine_group_ge	0.000482567
																Arachidicoccus	0.00386054
																Parafilimonas	0.00193027
																Parasegetibacter	0.000482567
																Segetibacter	0.000482567
																Taibaiella	0.00916878
																Terrimonas	0.00241284
																Chitinophaga	0.00241284
																Chitinophagaceae_unclassified	0.0125467
																Cnuella	0.000482567
																Ferruginibacter	0.000965135
																Flavisolibacter	0.00434311
																Flavitalea	0.000482567
																Niabella	0.000482567
																Niastella	0.000482567
																Lentimicrobiaceae_ge	0.000965135
																Lentimicrobiaceae_unclassified	0.000482567
																Lentimicrobium	0.000965135
																ST-12K33_ge	0.0014477
																Haliscomenobacter	0.000482567
																Phaeodactylibacter	0.000965135
																Arcticibacter	0.00627337
																Sphingobacterium	0.250935
																Mucilaginibacter	0.00482567
																Nubsella	0.000482567
																Olivibacter	0.000482567
																Parapedobacter	0.00193027
																Pedobacter	0.0728677
																Pseudopedobacter	0.00772108
																Solitalea	0.000965135
																Sphingobacteriaceae_unclassified	0.102304
																Sphingobacteriales_unclassified	0.00627337
																env.OPS_17_ge	0.000965135
																Chlamydia	0.00627337
																Chlamydiales_unclassified	0.00193027
																Candidatus_Protochlamydia	0.00193027
																Parachlamydiaceae_unclassified	0.00193027
																Candidatus_Fritschea	0.00772108
																Anaerolineaceae_unclassified	0.000482567
																TK10_ge	0.000965135
																AKYG1722_ge	0.000482567
																JG30-KF-CM45_ge	0.1052
																Sphaerobacteraceae_unclassified	0.000482567
																Ardenticatenales_ge	0.00193027
																Candidatus_Chloroploca	0.000965135
																Chloroflexales_unclassified	0.000482567
																FFCH7168_ge	0.000482567
																AKIW781_ge	0.000482567
																Gitt-GS-136_ge	0.0014477
																KD4-96_ge	0.000482567
																C0119_ge	0.0014477
																Ktedonobacterales_unclassified	0.000482567
																SBR2076_ge	0.000482567
