# Supplementary material for: Contribution of the Broiler Breeders’ Fecal Microbiota to the Establishment of the Eggshell Microbiota
Source: Front Microbiol. 2020 Apr 15;11:666. doi: 10.3389/fmicb.2020.00666 (PMC7176364; doi:10.3389/fmicb.2020.00666)
Supplement: TABLE S4 — Genera relative abundance by sample at the genus level at both samplng times. [file Table_4.XLSX]

## Sheet: Eggshell_T0_relative abundances
Sample	Bacteria,Firmicutes,Bacilli,Lactobacillales,Streptococcaceae,Streptococcus	Bacteria,Firmicutes,Clostridia,Clostridiales,Peptostreptococcaceae,Romboutsia	Bacteria,Firmicutes,Bacilli,Lactobacillales,Enterococcaceae,Enterococcus	Bacteria,Firmicutes,Bacilli,Lactobacillales,Lactobacillaceae,Lactobacillus	Bacteria,Actinobacteria,Actinobacteria,Actinomycetales,Corynebacteriaceae,Corynebacterium	Bacteria,Firmicutes,Erysipelotrichia,Erysipelotrichales,Erysipelotrichaceae,Turicibacter	Bacteria,Actinobacteria,Actinobacteria,Actinomycetales,Dermabacteraceae,Brachybacterium	Bacteria,Proteobacteria,Gammaproteobacteria,Enterobacteriales,Enterobacteriaceae,Enterobacteriaceae_unclassified	Bacteria,Firmicutes,Bacilli,Bacillales,Staphylococcaceae,Staphylococcus	Bacteria,Proteobacteria,Gammaproteobacteria,Pasteurellales,Pasteurellaceae,Gallibacterium	Bacteria,Actinobacteria,Actinobacteria,Actinomycetales,Micrococcaceae,Yaniella	Bacteria,Firmicutes,Clostridia,Clostridiales,Lachnospiraceae,Lachnospiraceae_unclassified	Bacteria,Firmicutes,Bacilli,Bacillales,Staphylococcaceae,Jeotgalicoccus	Bacteria,Firmicutes,Clostridia,Clostridiales,Peptostreptococcaceae,Terrisporobacter	Bacteria,Fusobacteria,Fusobacteriia,Fusobacteriales,Fusobacteriaceae,Fusobacterium	Bacteria,Actinobacteria,Actinobacteria,Actinomycetales,Brevibacteriaceae,Brevibacterium	Bacteria,Firmicutes,Bacilli,Bacillales,Staphylococcaceae,Salinicoccus	Bacteria,Firmicutes,Clostridia,Clostridiales,Clostridiaceae_1,Clostridium_sensu_stricto	Bacteria,Firmicutes,Bacilli,Bacillales,Bacillaceae_1,Bacillus	Bacteria,Actinobacteria,Actinobacteria,Bifidobacteriales,Bifidobacteriaceae,Bifidobacterium	Bacteria,Actinobacteria,Actinobacteria,Actinomycetales,Dietziaceae,Dietzia	Bacteria,Actinobacteria,Actinobacteria,Coriobacteriales,Coriobacteriaceae,Olsenella	Bacteria,Bacteroidetes,Bacteroidia,Bacteroidales,Bacteroidaceae,Bacteroides	Bacteria,Firmicutes,Negativicutes,Selenomonadales,Acidaminococcaceae,Acidaminococcaceae_unclassified	Bacteria,Proteobacteria,Gammaproteobacteria,Pseudomonadales,Moraxellaceae,Psychrobacter	Bacteria,Proteobacteria,Deltaproteobacteria,Desulfovibrionales,Desulfovibrionaceae,Desulfovibrio	Bacteria,Proteobacteria,Gammaproteobacteria,Enterobacteriales,Enterobacteriaceae,Salmonella	Bacteria,Firmicutes,Clostridia,Clostridiales,Peptococcaceae_1,Peptococcus	Bacteria,Firmicutes,Bacilli,Lactobacillales,Aerococcaceae,Facklamia	Bacteria,Firmicutes,Clostridia,Clostridiales,Lachnospiraceae,Blautia	Bacteria,Actinobacteria,Actinobacteria,Coriobacteriales,Coriobacteriaceae,Collinsella	Archaea,Euryarchaeota,Methanobacteria,Methanobacteriales,Methanobacteriaceae,Methanobrevibacter	Bacteria,Actinobacteria,Actinobacteria,Bifidobacteriales,Bifidobacteriaceae,Aeriscardovia	Bacteria,Firmicutes,Erysipelotrichia,Erysipelotrichales,Erysipelotrichaceae,Clostridium_XVIII	Bacteria,Firmicutes,Clostridia,Clostridiales,Ruminococcaceae,Pseudoflavonifractor	Bacteria,Firmicutes,Clostridia,Clostridiales,Ruminococcaceae,Faecalibacterium	Bacteria,Firmicutes,Erysipelotrichia,Erysipelotrichales,Erysipelotrichaceae,Erysipelotrichaceae_unclassified	Bacteria,Firmicutes,Negativicutes,Selenomonadales,Veillonellaceae,Veillonella	Bacteria,Firmicutes,Bacilli,Bacillales,Listeriaceae,Listeria	Bacteria,Proteobacteria,Gammaproteobacteria,Aeromonadales,Aeromonadaceae,Aeromonadaceae_unclassified	Bacteria,Firmicutes,Clostridia,Clostridiales,Ruminococcaceae,Intestinimonas	Bacteria,Bacteroidetes,Bacteroidia,Bacteroidales,Rikenellaceae,Alistipes	Bacteria,Firmicutes,Clostridia,Clostridiales,Ruminococcaceae,Butyricicoccus	Bacteria,Actinobacteria,Actinobacteria,Actinomycetales,Actinomycetaceae,Actinomyces	Bacteria,Firmicutes,Erysipelotrichia,Erysipelotrichales,Erysipelotrichaceae,Faecalitalea	Bacteria,Firmicutes,Bacilli,Bacilli_unclassified,Bacilli_unclassified,Bacilli_unclassified	Bacteria,Actinobacteria,Actinobacteria,Actinomycetales,Nocardiopsaceae,Nocardiopsis	Bacteria,Synergistetes,Synergistia,Synergistales,Synergistaceae,Cloacibacillus	Bacteria,Bacteroidetes,Bacteroidia,Bacteroidales,Porphyromonadaceae,Porphyromonadaceae_unclassified
48B1J0	0.000670690811535882	0.00536552649228706	0.00402414486921529	0.0556673373574782	0.073775989268947	0	0.000670690811535882	0	0.00134138162307176	0.000670690811535882	0.00402414486921529	0.0536552649228706	0.00469483568075117	0.000670690811535882	0.00335345405767941	0.000670690811535882	0.00201207243460765	0	0	0	0.00134138162307176	0.00402414486921529	0.0100603621730382	0.00201207243460765	0.000670690811535882	0.0073775989268947	0	0.000670690811535882	0.00134138162307176	0.00469483568075117	0.0160965794768612	0	0	0.00201207243460765	0.00335345405767941	0.00201207243460765	0.00670690811535882	0	0	0	0.00134138162307176	0.00201207243460765	0.00536552649228706	0	0.000670690811535882	0.00134138162307176	0.00335345405767941	0.000670690811535882	0.00536552649228706
48B2J0	0.00172413793103448	0.00344827586206897	0.00344827586206897	0.0681034482758621	0.0387931034482759	0.00431034482758621	0.00689655172413793	0.00172413793103448	0.00258620689655172	0.000862068965517241	0.0103448275862069	0.0905172413793103	0.0120689655172414	0	0.00172413793103448	0.00258620689655172	0.00258620689655172	0	0	0.000862068965517241	0.00172413793103448	0.000862068965517241	0.0396551724137931	0.000862068965517241	0.0206896551724138	0.00344827586206897	0	0	0.000862068965517241	0.00344827586206897	0.0112068965517241	0.00172413793103448	0	0.00258620689655172	0.00258620689655172	0.00258620689655172	0.00603448275862069	0	0	0.000862068965517241	0.000862068965517241	0.00258620689655172	0.00948275862068966	0.00344827586206897	0	0.00344827586206897	0.000862068965517241	0.00517241379310345	0.0172413793103448
48B3J0	0.00303398058252427	0.00424757281553398	0.00424757281553398	0.0552184466019418	0.066747572815534	0.00242718446601942	0.00182038834951456	0	0.00606796116504854	0.00182038834951456	0.00242718446601942	0.0570388349514563	0.00728155339805825	0	0.000606796116504854	0.00121359223300971	0.00424757281553398	0.00182038834951456	0	0	0	0.00303398058252427	0.00728155339805825	0	0.000606796116504854	0.00485436893203883	0.00121359223300971	0.00182038834951456	0.00121359223300971	0.00303398058252427	0.00424757281553398	0.000606796116504854	0	0.00121359223300971	0.00121359223300971	0.00242718446601942	0.00606796116504854	0	0	0.000606796116504854	0	0.00121359223300971	0.00242718446601942	0.000606796116504854	0	0.00121359223300971	0.00182038834951456	0.000606796116504854	0.00121359223300971
48B4J0	0.000746547219111609	0.00149309443822322	0.00410600970511385	0.0556177678238149	0.0791340052258305	0.000373273609555804	0.00223964165733483	0	0.00522583053378126	0.000746547219111609	0.000373273609555804	0.0395670026129153	0.00933184023889511	0	0.000746547219111609	0.00298618887644644	0.00261291526689063	0.00186636804777902	0	0	0.000373273609555804	0.000373273609555804	0.00671892497200448	0.00111982082866741	0.00149309443822322	0.0391937290033595	0	0	0.00223964165733483	0.00223964165733483	0.00671892497200448	0.000373273609555804	0	0	0.00149309443822322	0.00373273609555804	0.00597237775289287	0	0	0.000373273609555804	0	0.00522583053378126	0.00485255692422546	0.00111982082866741	0	0.000746547219111609	0.00298618887644644	0.000373273609555804	0.00410600970511385
48B5J0	0.0121827411167513	0.00812182741116751	0.00609137055837563	0.0558375634517767	0.144162436548223	0.00710659898477157	0.00812182741116751	0	0.00812182741116751	0.00203045685279188	0.00101522842639594	0.0842639593908629	0.00406091370558376	0	0.00101522842639594	0.00203045685279188	0.00812182741116751	0.00101522842639594	0	0	0	0.00101522842639594	0.0294416243654822	0	0.00101522842639594	0	0.00406091370558376	0.00406091370558376	0.00609137055837563	0.00913705583756345	0.00406091370558376	0	0	0	0.00406091370558376	0.00101522842639594	0.017258883248731	0	0	0.00101522842639594	0.00101522842639594	0.0050761421319797	0.00304568527918782	0	0	0.00609137055837563	0.00609137055837563	0.00304568527918782	0.0101522842639594
48B6J0	0.00316205533596838	0.00790513833992095	0.00316205533596838	0.0363636363636364	0.139130434782609	0.00158102766798419	0.00395256916996047	0.000790513833992095	0.00237154150197628	0.00237154150197628	0.00474308300395257	0.0798418972332016	0.0142292490118577	0	0.000790513833992095	0.00632411067193676	0.00553359683794466	0.000790513833992095	0	0	0.00316205533596838	0	0.0387351778656126	0.00158102766798419	0.000790513833992095	0.00395256916996047	0	0	0.00474308300395257	0.000790513833992095	0.016600790513834	0	0	0.000790513833992095	0.00553359683794466	0.00316205533596838	0.00711462450592885	0	0	0	0.000790513833992095	0.00711462450592885	0.00237154150197628	0	0	0.00237154150197628	0.00711462450592885	0.00316205533596838	0.0110671936758893
48B7J0	0.00426829268292683	0.0024390243902439	0.0048780487804878	0.0414634146341463	0.0189024390243902	0.0024390243902439	0.00304878048780488	0.0024390243902439	0.00182926829268293	0	0.0024390243902439	0.0640243902439024	0.00731707317073171	0	0	0.000609756097560976	0.00365853658536585	0	0	0	0.00121951219512195	0.00365853658536585	0.00548780487804878	0.000609756097560976	0.0024390243902439	0.00182926829268293	0	0.000609756097560976	0.0024390243902439	0.0024390243902439	0.0128048780487805	0.000609756097560976	0.000609756097560976	0.000609756097560976	0.0024390243902439	0.000609756097560976	0.00304878048780488	0	0	0	0	0.0024390243902439	0	0.00182926829268293	0	0.0024390243902439	0.00365853658536585	0.00304878048780488	0.00731707317073171
48C1J0	0	0.00837988826815642	0.00418994413407821	0.0279329608938547	0.0628491620111732	0.00837988826815642	0.0153631284916201	0	0.00837988826815642	0.00977653631284916	0.00558659217877095	0.0712290502793296	0.00279329608938547	0	0	0	0.0293296089385475	0	0	0.00418994413407821	0	0.00279329608938547	0.00837988826815642	0.00139664804469274	0	0.00418994413407821	0	0.00698324022346369	0	0.00279329608938547	0.00558659217877095	0	0	0	0.00279329608938547	0.00279329608938547	0.00418994413407821	0	0	0.0181564245810056	0	0.00558659217877095	0.00279329608938547	0.00279329608938547	0	0.00279329608938547	0.00977653631284916	0.00139664804469274	0.00698324022346369
48C2J0	0.00542005420054201	0.00948509485094851	0.00542005420054201	0.035230352303523	0.0840108401084011	0.0013550135501355	0.024390243902439	0.0013550135501355	0.010840108401084	0	0.00948509485094851	0.102981029810298	0.0040650406504065	0.002710027100271	0.002710027100271	0.00813008130081301	0.018970189701897	0.00542005420054201	0	0	0.002710027100271	0	0.021680216802168	0.0013550135501355	0	0	0	0	0.002710027100271	0.0013550135501355	0.0040650406504065	0	0	0	0.0013550135501355	0.0013550135501355	0.00542005420054201	0	0	0.0311653116531165	0	0.0013550135501355	0.00677506775067751	0.00542005420054201	0	0.0040650406504065	0.00542005420054201	0.0013550135501355	0.0013550135501355
48C3J0	0.0069060773480663	0.0069060773480663	0.0124309392265193	0.0455801104972376	0.0276243093922652	0.0165745856353591	0.0151933701657459	0.00138121546961326	0.0110497237569061	0	0.00828729281767956	0.0759668508287293	0.0207182320441989	0	0	0.0069060773480663	0.0165745856353591	0.00828729281767956	0	0	0	0	0.00828729281767956	0.00138121546961326	0.00276243093922652	0.069060773480663	0	0	0	0	0.00414364640883978	0	0	0	0	0	0	0	0	0	0	0	0.00828729281767956	0.00276243093922652	0	0.00138121546961326	0.00414364640883978	0.00276243093922652	0.00414364640883978
48C3J0F	0.188729175437541	0.0324372005372787	0.0903149495800004	0.405645436138008	0.0360658366913254	0.00495178524889236	0.0278663218459935	0.0277059401375273	0.00823961027244843	0.00555321665564042	0.0157575028567992	0.00621479120306329	0.00392935185742066	0.00603436178103887	0.00308734788797338	0.00753794029790902	0.00120286281349612	0.0325173913915118	8.01908542330747e-05	0.0217517692107215	0.0046711172590766	0.000481145125398448	0.00370882700827971	0.000641526833864598	0.00158376937110323	0.000721717688097672	0	0.00060143140674806	0.000481145125398448	0.00046109741184018	0.000581383693189792	0.000180429422024418	0.00449068783705218	0.000340811130490568	0.000340811130490568	8.01908542330747e-05	0.000400954271165374	0.00356849301337182	0	0.000160381708466149	0.000280667989815761	0.000200477135582687	0.000120286281349612	0.000120286281349612	6.0143140674806e-05	0.00240572562699224	0.000521240552514986	0.000120286281349612	0.00118281509993785
48C4J0	0.00297619047619048	0.0119047619047619	0.00446428571428571	0.0446428571428571	0.0357142857142857	0.00892857142857143	0.0104166666666667	0	0.00297619047619048	0.00297619047619048	0.0104166666666667	0.0625	0.00744047619047619	0	0	0.00148809523809524	0.0148809523809524	0.00297619047619048	0	0	0.00297619047619048	0.00148809523809524	0.0119047619047619	0.00148809523809524	0.00297619047619048	0.00148809523809524	0.00297619047619048	0	0	0.00148809523809524	0.00595238095238095	0	0	0	0.00148809523809524	0.00297619047619048	0.00446428571428571	0	0	0	0	0.00446428571428571	0.00148809523809524	0	0	0	0.00297619047619048	0.00148809523809524	0.00446428571428571
48C5J0	0.00155763239875389	0.00311526479750779	0.00934579439252336	0.0576323987538941	0.0264797507788162	0.0233644859813084	0.0109034267912773	0	0.00623052959501558	0	0.00155763239875389	0.0825545171339564	0.00467289719626168	0	0.00467289719626168	0.00623052959501558	0.0171339563862928	0.00467289719626168	0	0.00155763239875389	0.00155763239875389	0	0.0233644859813084	0.00311526479750779	0.00623052959501558	0.00155763239875389	0	0	0	0.00311526479750779	0.0124610591900312	0	0	0	0.00311526479750779	0.00623052959501558	0.00934579439252336	0	0	0.0155763239875389	0	0	0.00155763239875389	0.00155763239875389	0	0.00311526479750779	0.014018691588785	0.00155763239875389	0.00778816199376947
48C6J0	0.00302571860816944	0.0075642965204236	0.00302571860816944	0.0468986384266263	0.0166414523449319	0	0.0151285930408472	0	0.0075642965204236	0	0.00453857791225416	0.0741301059001513	0.0075642965204236	0	0.00151285930408472	0.010590015128593	0.0393343419062027	0	0	0.00302571860816944	0	0.00302571860816944	0.0151285930408472	0	0.0075642965204236	0	0	0.00302571860816944	0	0.00302571860816944	0.00605143721633888	0	0	0	0.0075642965204236	0	0.00302571860816944	0	0	0	0.00151285930408472	0.00302571860816944	0.0075642965204236	0.00151285930408472	0	0	0.00453857791225416	0.00302571860816944	0.00453857791225416
48C7J0	0.00278551532033426	0.020891364902507	0	0.0459610027855153	0.0389972144846797	0.00696378830083565	0.0181058495821727	0	0.0153203342618384	0.00139275766016713	0.00557103064066852	0.096100278551532	0.00557103064066852	0.00139275766016713	0	0.00278551532033426	0.0250696378830084	0.00557103064066852	0	0	0	0.00278551532033426	0.00974930362116992	0	0.00139275766016713	0	0	0.00278551532033426	0.00139275766016713	0	0.011142061281337	0	0	0.00139275766016713	0	0.00417827298050139	0.00835654596100279	0	0	0	0	0.00278551532033426	0.00417827298050139	0	0	0.00139275766016713	0.0181058495821727	0	0.00139275766016713
48D1J0	0.00110741971207087	0.0044296788482835	0.00609080841638981	0.0592469545957918	0.0409745293466224	0.000553709856035437	0.243632336655592	0.00110741971207087	0.00830564784053156	0.00221483942414175	0.00664451827242525	0.0747508305647841	0.00387596899224806	0.000553709856035437	0	0.00387596899224806	0.00221483942414175	0	0	0	0.00332225913621262	0.00221483942414175	0.0221483942414175	0.00110741971207087	0.00166112956810631	0	0	0.000553709856035437	0.00166112956810631	0.000553709856035437	0.00387596899224806	0.000553709856035437	0	0.00387596899224806	0.0116279069767442	0.00609080841638981	0.0044296788482835	0	0	0.00110741971207087	0	0.00387596899224806	0.00332225913621262	0	0	0.00830564784053156	0.00553709856035437	0	0.00609080841638981
48D2J0	0.00151400454201363	0.0113550340651022	0.00302800908402725	0.0499621498864497	0.0401211203633611	0	0.313398940196821	0.000757002271006813	0.0060560181680545	0	0	0.0802422407267222	0.00227100681302044	0	0	0.00378501135503407	0.000757002271006813	0.000757002271006813	0.00151400454201363	0	0.00302800908402725	0	0.0158970476911431	0	0.00378501135503407	0	0	0	0.00227100681302044	0.00378501135503407	0.00227100681302044	0.000757002271006813	0	0.000757002271006813	0.00529901589704769	0.012112036336109	0.00908402725208176	0	0	0.00227100681302044	0	0.0060560181680545	0.00832702498107494	0.00227100681302044	0	0.00984102952308857	0.00151400454201363	0	0.0136260408781226
48D3J0	0.000554938956714761	0.00776914539400666	0.00388457269700333	0.074361820199778	0.0538290788013319	0	0.273584905660377	0	0.0105438401775805	0	0.00221975582685905	0.0893451720310766	0.00554938956714761	0.00110987791342952	0	0.00221975582685905	0.00388457269700333	0.00443951165371809	0	0	0.00166481687014428	0.00166481687014428	0.0271920088790233	0	0.00166481687014428	0	0	0.000554938956714761	0.00221975582685905	0.00443951165371809	0.00443951165371809	0.000554938956714761	0	0.00221975582685905	0.00443951165371809	0.00776914539400666	0.00499445061043285	0	0	0.00110987791342952	0.00221975582685905	0.00332963374028857	0.00388457269700333	0	0	0.0072142064372919	0.00110987791342952	0	0.0105438401775805
48D4J0	0	0.00929752066115703	0.00103305785123967	0.0423553719008264	0.0351239669421488	0	0.259297520661157	0.00206611570247934	0.0113636363636364	0	0.00206611570247934	0.0898760330578512	0.00929752066115703	0	0	0.00206611570247934	0.00516528925619835	0	0	0	0.00103305785123967	0.00206611570247934	0.0206611570247934	0	0.0185950413223141	0	0	0.00206611570247934	0	0.00826446280991736	0.00413223140495868	0.00619834710743802	0	0	0.00413223140495868	0.00929752066115703	0.00103305785123967	0	0	0	0.00206611570247934	0.00413223140495868	0.00516528925619835	0	0	0.00516528925619835	0	0	0.00309917355371901
48D5J0	0	0.0064143681847338	0.00449005772931366	0.0756895445798589	0.0378447722899294	0	0.259781911481719	0	0.00577293136626042	0	0.00128287363694676	0.0846696600384862	0.0102629890955741	0	0.00064143681847338	0	0	0.00128287363694676	0	0.00064143681847338	0.00064143681847338	0.00256574727389352	0.0141116100064144	0	0.0032071840923669	0	0.00192431045542014	0.00128287363694676	0	0.00256574727389352	0.00384862091084028	0.00256574727389352	0	0.00128287363694676	0.00384862091084028	0.0218088518280949	0.00577293136626042	0	0	0.00384862091084028	0.00128287363694676	0.00192431045542014	0.00513149454778704	0.00128287363694676	0	0.00449005772931366	0.00256574727389352	0	0.00256574727389352
48D6J0	0	0.00264131008980454	0.00105652403592182	0.0713153724247227	0.0417326994189118	0.00158478605388273	0.302694136291601	0.00105652403592182	0.00422609614368727	0	0.00158478605388273	0.0565240359218172	0.00369783412572636	0	0.000528262017960909	0.00158478605388273	0.000528262017960909	0.00105652403592182	0	0.000528262017960909	0	0.00422609614368727	0.0301109350237718	0	0.00158478605388273	0.000528262017960909	0	0.00211304807184363	0.000528262017960909	0.00316957210776545	0.00528262017960909	0.00211304807184363	0.000528262017960909	0.00105652403592182	0.00264131008980454	0.00950871632329636	0.00792393026941363	0	0	0	0	0.00264131008980454	0.00264131008980454	0.000528262017960909	0	0.00422609614368727	0.00211304807184363	0	0.0147913365029054
48D7J0	0	0.00508905852417303	0.000636132315521629	0.0604325699745547	0.0184478371501272	0	0.21501272264631	0	0.0114503816793893	0	0.00318066157760814	0.083969465648855	0.00636132315521628	0	0.00190839694656489	0.00190839694656489	0.00318066157760814	0	0	0.000636132315521629	0.000636132315521629	0.000636132315521629	0.0229007633587786	0	0.0044529262086514	0	0	0	0.000636132315521629	0.00254452926208651	0.00190839694656489	0.00127226463104326	0.00127226463104326	0	0.00826972010178117	0.00699745547073791	0.00763358778625954	0	0	0.000636132315521629	0	0.00190839694656489	0.000636132315521629	0	0	0.00381679389312977	0.00127226463104326	0.00190839694656489	0.0114503816793893
71J0	0.00212089077412513	0.0148462354188759	0.00742311770943796	0.0858960763520679	0.0307529162248144	0	0.0212089077412513	0.00106044538706257	0.0487804878048781	0	0.0106044538706257	0.113467656415695	0.00424178154825027	0	0.00106044538706257	0.0063626723223754	0.0986214209968187	0.00106044538706257	0	0.0031813361611877	0.0031813361611877	0.00106044538706257	0.0180275715800636	0	0	0.00106044538706257	0	0	0	0.00424178154825027	0.0095440084835631	0.00212089077412513	0	0.00106044538706257	0.00106044538706257	0.0095440084835631	0.00212089077412513	0	0	0.00530222693531283	0.00424178154825027	0.00530222693531283	0.0063626723223754	0.00106044538706257	0	0.00742311770943796	0.00212089077412513	0.00106044538706257	0.00212089077412513
72J0	0.00249376558603491	0.00872817955112219	0.00249376558603491	0.0910224438902743	0.0349127182044888	0.00124688279301746	0.0211970074812968	0.00124688279301746	0.0336658354114713	0	0.0149625935162095	0.084788029925187	0.0162094763092269	0	0	0.00249376558603491	0.0860349127182045	0.00249376558603491	0.00124688279301746	0	0.00872817955112219	0	0.00872817955112219	0.00124688279301746	0	0.00124688279301746	0	0	0	0.00124688279301746	0.00124688279301746	0	0.00249376558603491	0	0.0162094763092269	0.00748129675810474	0.00872817955112219	0.00374064837905237	0	0	0	0.00249376558603491	0.013715710723192	0	0.00124688279301746	0.00498753117206983	0.00498753117206983	0	0.00249376558603491
73J0	0	0.00187617260787992	0.00500312695434647	0.032520325203252	0.0293933708567855	0.000625390869293308	0.00875547217010632	0.00125078173858662	0.0275171982489056	0	0.51031894934334	0.0431519699812383	0.000625390869293308	0	0	0.00437773608505316	0.0312695434646654	0.000625390869293308	0	0	0	0	0.00938086303939963	0	0.00125078173858662	0	0	0.000625390869293308	0	0.00938086303939963	0.00125078173858662	0.000625390869293308	0	0.000625390869293308	0.00187617260787992	0.00312695434646654	0.00500312695434647	0	0	0.000625390869293308	0	0.00125078173858662	0.00125078173858662	0.000625390869293308	0	0.00562851782363977	0.000625390869293308	0	0.000625390869293308
74J0	0.0028328611898017	0.0226628895184136	0.0084985835694051	0.0793201133144476	0.0524079320113314	0	0.0127478753541076	0.00141643059490085	0.0297450424929178	0	0.0113314447592068	0.138810198300283	0.00424929178470255	0	0	0.00708215297450425	0.0424929178470255	0.0056657223796034	0	0.00141643059490085	0.0028328611898017	0	0.00141643059490085	0	0	0	0	0.00141643059490085	0	0.0056657223796034	0	0	0	0.00708215297450425	0.0028328611898017	0.00991501416430595	0.0056657223796034	0	0	0.0056657223796034	0	0	0	0	0	0.0141643059490085	0.0084985835694051	0	0.00424929178470255
75J0	0.00150602409638554	0.00301204819277108	0	0.0783132530120482	0.0391566265060241	0	0.016566265060241	0.00150602409638554	0.0240963855421687	0	0.00903614457831325	0.118975903614458	0.00451807228915663	0	0	0.00451807228915663	0.0120481927710843	0	0	0.00602409638554217	0.00150602409638554	0.00602409638554217	0.00301204819277108	0	0	0.00451807228915663	0	0	0	0.00451807228915663	0.0105421686746988	0	0	0.00753012048192771	0.00451807228915663	0.00451807228915663	0.00753012048192771	0	0	0	0	0.00150602409638554	0.00150602409638554	0.00451807228915663	0.00150602409638554	0.00602409638554217	0.00451807228915663	0	0.00301204819277108
76J0	0	0.00547945205479452	0.00273972602739726	0.112328767123288	0.0438356164383562	0	0.0191780821917808	0	0.0287671232876712	0	0.00821917808219178	0.101369863013699	0.00684931506849315	0.00136986301369863	0.00136986301369863	0.00958904109589041	0.036986301369863	0.00821917808219178	0	0	0	0	0.00684931506849315	0.00547945205479452	0	0.0315068493150685	0	0.00136986301369863	0	0.00410958904109589	0	0	0	0.00136986301369863	0.00136986301369863	0.010958904109589	0.00273972602739726	0	0	0	0	0	0.0246575342465753	0.0205479452054795	0	0.00273972602739726	0.00958904109589041	0.010958904109589	0
77J0	0.00129032258064516	0.00645161290322581	0	0.11741935483871	0.0645161290322581	0	0.0206451612903226	0.00258064516129032	0.0258064516129032	0.00129032258064516	0.0193548387096774	0.109677419354839	0.00903225806451613	0.00129032258064516	0	0.00774193548387097	0.0516129032258065	0.0116129032258065	0	0.00129032258064516	0	0	0.00387096774193548	0	0	0.00129032258064516	0	0	0.00129032258064516	0.00129032258064516	0	0	0.00387096774193548	0.00129032258064516	0.00258064516129032	0.00516129032258065	0.00645161290322581	0	0	0.00129032258064516	0	0	0.00387096774193548	0	0	0.00129032258064516	0.00387096774193548	0	0
HB31J0	0	0.00405405405405405	0.00135135135135135	0.0506756756756757	0.00675675675675676	0	0.0432432432432432	0	0.0472972972972973	0.00135135135135135	0.0135135135135135	0.0472972972972973	0.00337837837837838	0.000675675675675676	0.000675675675675676	0.0148648648648649	0.380405405405405	0.00135135135135135	0	0	0.00608108108108108	0.000675675675675676	0.0108108108108108	0.000675675675675676	0	0.0027027027027027	0	0	0	0.0027027027027027	0.0027027027027027	0	0.000675675675675676	0.00135135135135135	0.0027027027027027	0.00472972972972973	0.00405405405405405	0	0	0	0.00202702702702703	0.000675675675675676	0.00472972972972973	0	0.000675675675675676	0.0108108108108108	0.00337837837837838	0	0.00337837837837838
HB32J0	0.00069060773480663	0.0069060773480663	0.00483425414364641	0.0683701657458564	0.0324585635359116	0.00207182320441989	0.0331491712707182	0.00138121546961326	0.0276243093922652	0.00414364640883978	0.0117403314917127	0.0490331491712707	0.00069060773480663	0.00414364640883978	0.00069060773480663	0.00828729281767956	0.308701657458564	0	0	0	0	0.00138121546961326	0.0220994475138122	0	0	0.00276243093922652	0	0.00138121546961326	0	0.00138121546961326	0.0069060773480663	0.00069060773480663	0	0.00069060773480663	0.00069060773480663	0.00276243093922652	0.00621546961325967	0.00069060773480663	0	0.00069060773480663	0	0.00069060773480663	0.00138121546961326	0	0	0.0069060773480663	0.00966850828729282	0	0.00483425414364641
HB33J0	0.000649350649350649	0.00584415584415584	0.0331168831168831	0.0279220779220779	0.0123376623376623	0.0025974025974026	0.0344155844155844	0	0.0357142857142857	0.0012987012987013	0.00779220779220779	0.0441558441558442	0.000649350649350649	0	0	0.00974025974025974	0.301298701298701	0.0012987012987013	0	0.000649350649350649	0.0012987012987013	0.0863636363636364	0.0103896103896104	0	0	0.00454545454545455	0	0.0012987012987013	0	0.000649350649350649	0.0025974025974026	0.0012987012987013	0	0.000649350649350649	0.0038961038961039	0.0103896103896104	0.00519480519480519	0	0	0	0	0.0012987012987013	0.00324675324675325	0.000649350649350649	0	0.00324675324675325	0.00584415584415584	0	0.00454545454545455
HB34J0	0.00216216216216216	0.00972972972972973	0.00216216216216216	0.0691891891891892	0.00972972972972973	0	0.0594594594594595	0	0.00972972972972973	0.00108108108108108	0.00648648648648649	0.0724324324324324	0.00216216216216216	0	0	0.00756756756756757	0.128648648648649	0.00108108108108108	0	0	0.00432432432432432	0.00540540540540541	0.0335135135135135	0	0.00432432432432432	0.00540540540540541	0	0	0	0.00864864864864865	0.00216216216216216	0	0	0.00108108108108108	0.00432432432432432	0.0151351351351351	0.00864864864864865	0	0	0	0	0.00324324324324324	0.00648648648648649	0	0.00108108108108108	0.00540540540540541	0.0140540540540541	0	0.00216216216216216
HB35J0	0	0.00610997963340122	0.186693822131704	0.0291921249151392	0.03326544467074	0	0.0291921249151392	0	0.0176510522742702	0.00950441276306857	0.00339443312966735	0.031907671418873	0.00271554650373388	0.000678886625933469	0	0.00407331975560081	0.257976917854718	0.000678886625933469	0	0	0.00339443312966735	0	0.0162932790224033	0.000678886625933469	0.00135777325186694	0.00203665987780041	0	0	0.00135777325186694	0.00203665987780041	0.00203665987780041	0	0	0	0.00203665987780041	0.00610997963340122	0.00203665987780041	0.000678886625933469	0	0.00271554650373388	0	0.00814663951120163	0.00135777325186694	0.000678886625933469	0	0.00950441276306857	0.00135777325186694	0	0.00610997963340122
HB36J0	0.00297324083250743	0.0089197224975223	0.000991080277502478	0.045589692765114	0.0128840436075322	0	0.0465807730426165	0	0.0168483647175421	0	0.0089197224975223	0.0584737363726462	0.000991080277502478	0.000991080277502478	0	0.00693756194251734	0.372646184340932	0.000991080277502478	0	0	0.000991080277502478	0.000991080277502478	0.0247770069375619	0	0	0.00297324083250743	0	0	0	0.00396432111000991	0.00693756194251734	0	0	0	0.00396432111000991	0.00991080277502478	0.00198216055500496	0	0.000991080277502478	0	0	0.000991080277502478	0.00594648166501487	0.00396432111000991	0	0	0.00198216055500496	0	0.00198216055500496
HB37J0	0.00165425971877585	0.0148883374689826	0.00661703887510339	0.0454921422663358	0.0124069478908189	0.00496277915632754	0.0380479735318445	0	0.0157154673283706	0.00909842845326716	0.010752688172043	0.0504549214226634	0.00165425971877585	0.00496277915632754	0.00248138957816377	0.00413564929693962	0.330024813895782	0.00248138957816377	0	0	0.00578990901571547	0	0.0413564929693962	0	0	0.00992555831265509	0	0	0	0.00248138957816377	0.00413564929693962	0	0	0	0.00248138957816377	0.00661703887510339	0.00165425971877585	0	0	0.00165425971877585	0	0.00165425971877585	0.00661703887510339	0.00165425971877585	0.000827129859387924	0.010752688172043	0.00909842845326716	0	0.00413564929693962
LAND11J0	0.00631412786108919	0.0134175217048145	0.00315706393054459	0.0489344909234412	0.0678768745067088	0.0110497237569061	0.0189423835832676	0	0.0205209155485399	0.00315706393054459	0.021310181531176	0.0520915548539858	0.0355169692186267	0	0	0.0276243093922652	0.0710339384372533	0.00236779794790845	0	0	0.00947119179163378	0	0.0299921073401736	0.0015785319652723	0.00236779794790845	0.00236779794790845	0	0	0.00236779794790845	0.00236779794790845	0.00868192580899763	0.000789265982636148	0	0.00552486187845304	0.00236779794790845	0.0102604577742699	0.00236779794790845	0	0	0.0015785319652723	0	0.00236779794790845	0	0.000789265982636148	0	0.0102604577742699	0.00236779794790845	0	0.00552486187845304
LAND12J0	0.00309597523219814	0.0108359133126935	0.00541795665634675	0.0356037151702786	0.0224458204334365	0.00464396284829721	0.0309597523219814	0.000773993808049536	0.0247678018575851	0.00232198142414861	0.0154798761609907	0.0626934984520124	0.0239938080495356	0.00154798761609907	0.000773993808049536	0.0247678018575851	0.0688854489164087	0.00696594427244582	0	0	0.00386996904024768	0.00309597523219814	0.0162538699690402	0.000773993808049536	0.00232198142414861	0	0.00386996904024768	0	0.000773993808049536	0.00232198142414861	0.00928792569659443	0	0.00154798761609907	0	0.000773993808049536	0.00464396284829721	0.0123839009287926	0	0	0	0	0.00309597523219814	0.00232198142414861	0.000773993808049536	0	0.00928792569659443	0.00851393188854489	0.000773993808049536	0.00541795665634675
LAND13J0	0.00202634245187437	0.00709219858156028	0.00405268490374873	0.0466058763931104	0.0648429584599797	0.00709219858156028	0.0364741641337386	0.00101317122593718	0.0141843971631206	0.00101317122593718	0.0172239108409321	0.07193515704154	0.0455927051671733	0.00303951367781155	0.00101317122593718	0.0101317122593718	0.0486322188449848	0.00506585612968592	0.00101317122593718	0	0.00202634245187437	0.00101317122593718	0.0212765957446809	0.00303951367781155	0.00101317122593718	0	0	0	0	0.00709219858156028	0.011144883485309	0	0	0.00101317122593718	0.00202634245187437	0.00303951367781155	0.00911854103343465	0.00101317122593718	0	0	0	0.00810536980749747	0.00506585612968592	0.00405268490374873	0	0.00405268490374873	0.00303951367781155	0	0.0060790273556231
LAND14J0	0.0022883295194508	0.0099160945842868	0.0022883295194508	0.0541571319603356	0.0183066361556064	0	0.0160183066361556	0	0.0251716247139588	0.0030511060259344	0.0175438596491228	0.0640732265446224	0.0198321891685736	0.0007627765064836	0	0.0160183066361556	0.0617848970251716	0.0015255530129672	0.0015255530129672	0.0030511060259344	0.0045766590389016	0	0.0244088482074752	0.0007627765064836	0.003813882532418	0.0007627765064836	0	0.0007627765064836	0.0015255530129672	0.0022883295194508	0.0167810831426392	0	0	0.0007627765064836	0.0045766590389016	0.0045766590389016	0.0061022120518688	0	0	0.0015255530129672	0.0007627765064836	0.003813882532418	0.0015255530129672	0.0022883295194508	0	0.0144927536231884	0.0045766590389016	0	0.0045766590389016
LAND15J0	0.00184331797235023	0.0119815668202765	0.00460829493087558	0.0276497695852535	0.0691244239631336	0.00368663594470046	0.0138248847926267	0	0.0221198156682028	0.00368663594470046	0.00368663594470046	0.0875576036866359	0.0248847926267281	0.000921658986175115	0	0.0119815668202765	0.0276497695852535	0.00184331797235023	0	0.000921658986175115	0.00645161290322581	0.000921658986175115	0.0368663594470046	0.00368663594470046	0.00276497695852535	0.00276497695852535	0	0	0.000921658986175115	0.00368663594470046	0.00829493087557604	0.000921658986175115	0	0	0.00184331797235023	0.00276497695852535	0.0101382488479263	0	0	0	0	0	0.00552995391705069	0.00184331797235023	0	0.00276497695852535	0.00276497695852535	0	0.00921658986175115
LAND16J0	0.00069060773480663	0.0117403314917127	0.00276243093922652	0.0234806629834254	0.0566298342541436	0.00621546961325967	0.0338397790055249	0.00069060773480663	0.0138121546961326	0	0.018646408839779	0.0614640883977901	0.0124309392265193	0	0.00138121546961326	0.0179558011049724	0.0296961325966851	0.00276243093922652	0.00069060773480663	0.00138121546961326	0.00207182320441989	0.00069060773480663	0.0324585635359116	0.00276243093922652	0.00276243093922652	0	0.00069060773480663	0	0.00138121546961326	0.00069060773480663	0.00759668508287293	0.00345303867403315	0	0	0.00414364640883978	0.00345303867403315	0.00828729281767956	0	0	0	0.00207182320441989	0.00276243093922652	0.00069060773480663	0	0	0.0124309392265193	0.00276243093922652	0	0.00759668508287293
LAND41J0	0.00533175355450237	0.00414691943127962	0.00829383886255924	0.023696682464455	0.0669431279620853	0.00355450236966825	0.0260663507109005	0.000592417061611374	0.0130331753554502	0.00177725118483412	0.00414691943127962	0.0485781990521327	0.0385071090047393	0.000592417061611374	0	0.0136255924170616	0.0296208530805687	0	0.00118483412322275	0.000592417061611374	0.0023696682464455	0.0023696682464455	0.0195497630331754	0.000592417061611374	0.00533175355450237	0.00177725118483412	0	0	0.00770142180094787	0.00414691943127962	0.00947867298578199	0	0	0.0023696682464455	0.00355450236966825	0.00296208530805687	0.00296208530805687	0	0	0.00296208530805687	0.000592417061611374	0.00118483412322275	0.00414691943127962	0	0	0.004739336492891	0.000592417061611374	0.000592417061611374	0.0112559241706161
LAND42J0	0.00183150183150183	0.0274725274725275	0.010989010989011	0.010989010989011	0.0769230769230769	0	0.010989010989011	0.00366300366300366	0.00915750915750916	0	0.00183150183150183	0.0549450549450549	0.0146520146520147	0	0	0.0164835164835165	0.0183150183150183	0.00366300366300366	0	0	0.00366300366300366	0	0.0201465201465201	0.00366300366300366	0.00366300366300366	0	0.00732600732600733	0	0	0	0.0164835164835165	0	0	0.00183150183150183	0.00183150183150183	0.00549450549450549	0.00183150183150183	0.00732600732600733	0	0	0	0.00183150183150183	0	0	0	0.00366300366300366	0.00183150183150183	0	0.00549450549450549
LAND43J0	0.00506585612968592	0.00861195542046606	0.00861195542046606	0.0374873353596758	0.099290780141844	0.000506585612968592	0.0121580547112462	0.00101317122593718	0.0182370820668693	0.00354609929078014	0.00303951367781155	0.0542046605876393	0.0455927051671733	0	0	0.013677811550152	0.0227963525835866	0.00506585612968592	0	0	0.00759878419452888	0.000506585612968592	0.0131712259371834	0	0.00557244174265451	0.00202634245187437	0.00101317122593718	0.000506585612968592	0.00303951367781155	0.00405268490374873	0.011144883485309	0	0	0	0.00151975683890578	0.000506585612968592	0.00506585612968592	0.000506585612968592	0	0.00101317122593718	0.000506585612968592	0.00253292806484296	0.00151975683890578	0.00151975683890578	0	0.00759878419452888	0.00202634245187437	0.000506585612968592	0.013677811550152
LAND44J0	0.00786838340486409	0.0121602288984263	0.0135908440629471	0.0164520743919886	0.0851216022889843	0.00286123032904149	0.0143061516452074	0.0050071530758226	0.00429184549356223	0.00143061516452074	0.00429184549356223	0.0457796852646638	0.0107296137339056	0	0.000715307582260372	0.00858369098712446	0.0243204577968526	0.000715307582260372	0.00643776824034335	0	0.00214592274678112	0	0.0107296137339056	0	0.00929899856938484	0.00143061516452074	0.0050071530758226	0	0.000715307582260372	0.00214592274678112	0.00286123032904149	0.000715307582260372	0	0	0.00286123032904149	0.00214592274678112	0.00286123032904149	0	0	0.0107296137339056	0	0	0.00286123032904149	0	0	0.00143061516452074	0	0	0.0150214592274678
LAND45J0	0.00814332247557003	0.00271444082519001	0.00705754614549403	0.0157437567861021	0.0738327904451683	0.001085776330076	0.0146579804560261	0.001085776330076	0.00651465798045603	0.001085776330076	0.00542888165038002	0.0342019543973941	0.011400651465798	0	0	0.00488599348534202	0.0217155266015201	0.0477741585233442	0	0	0.00271444082519001	0	0.00760043431053203	0.000542888165038002	0.00380021715526602	0.00162866449511401	0.000542888165038002	0	0.000542888165038002	0.001085776330076	0.00597176981541802	0	0	0.000542888165038002	0.00380021715526602	0.000542888165038002	0.00271444082519001	0	0	0	0.001085776330076	0.000542888165038002	0.000542888165038002	0.00325732899022801	0	0.00380021715526602	0	0.001085776330076	0.0168295331161781
LAND46J0	0.00371057513914657	0.0148423005565863	0.0197897340754484	0.0191713048855906	0.093382807668522	0.00247371675943105	0.0247371675943105	0.000618429189857761	0.00432900432900433	0.00309214594928881	0.0111317254174397	0.0445269016697588	0.0327767470624614	0.000618429189857761	0	0.0123685837971552	0.00742115027829314	0	0	0.000618429189857761	0.00185528756957328	0	0.0235003092145949	0	0.00742115027829314	0.00123685837971552	0.00247371675943105	0	0.00185528756957328	0.00185528756957328	0.00989486703772418	0.000618429189857761	0	0	0.00123685837971552	0.00185528756957328	0.00247371675943105	0	0	0.000618429189857761	0.00185528756957328	0	0.00123685837971552	0.000618429189857761	0.00123685837971552	0.00989486703772418	0.00494743351886209	0	0.025974025974026
LI11J0	0.00239664469742361	0.00958657878969443	0.00299580587177951	0.0404433792690234	0.500898741761534	0.00449370880766926	0.0739964050329539	0	0.00179748352306771	0	0.0011983223487118	0.0401437986818454	0.00329538645895746	0.000599161174355902	0.00149790293588975	0.000599161174355902	0.000299580587177951	0.000299580587177951	0	0.000299580587177951	0	0	0.0131815458358298	0.000299580587177951	0.0011983223487118	0.000599161174355902	0	0.000898741761533853	0.00179748352306771	0.000898741761533853	0.00718993409227082	0.00179748352306771	0.000599161174355902	0.00299580587177951	0.00179748352306771	0.0011983223487118	0.00299580587177951	0	0	0	0	0.00539245056920312	0.00329538645895746	0	0.000299580587177951	0.00239664469742361	0	0	0.0113840623127621
LI12J0	0.00769971126082772	0.00481231953801732	0.00224574911774142	0.026307346807828	0.518126403593199	0.00288739172281039	0.0760346487006737	0	0.00192492781520693	0	0	0.0304780237407764	0.0109079242861726	0	0.00352903432787937	0.000641642605068977	0.000320821302534488	0.000320821302534488	0	0	0	0	0.014436958614052	0	0.00224574911774142	0	0	0	0.000641642605068977	0.00288739172281039	0.00256657042027591	0	0	0.000641642605068977	0.00128328521013795	0.00224574911774142	0.00128328521013795	0	0	0.00128328521013795	0.000320821302534488	0.00224574911774142	0.00256657042027591	0	0.000962463907603465	0.00128328521013795	0.000641642605068977	0.000320821302534488	0.00769971126082772
LI13J0	0.00742390497401633	0.0137342242019302	0.0482553823311062	0.108017817371938	0.161098737936154	0.0066815144766147	0.165924276169265	0.00111358574610245	0.00816629547141797	0	0.00334075723830735	0.0512249443207127	0.0155902004454343	0.000371195248700817	0.000371195248700817	0.000371195248700817	0.00185597624350408	0.00185597624350408	0	0.00111358574610245	0.00185597624350408	0.000371195248700817	0.0152190051967335	0	0.00482553823311062	0.00148478099480327	0.000371195248700817	0	0.0044543429844098	0.00259836674090572	0.00853749072011878	0	0.00111358574610245	0.00111358574610245	0.000371195248700817	0.00185597624350408	0.0044543429844098	0	0	0.0044543429844098	0.00148478099480327	0.00408314773570898	0.00111358574610245	0	0	0.00556792873051225	0.0066815144766147	0.000742390497401633	0.00482553823311062
LI14J0	0.00298953662182362	0.00996512207274539	0.00697558545092177	0.0802192326856004	0.127055306427504	0.00398604882909816	0.151968111609367	0	0.145490782262083	0.00298953662182362	0.00249128051818635	0.0438465371200797	0.00946686596910812	0	0.00049825610363727	0.00199302441454908	0	0.00049825610363727	0	0.000996512207274539	0.000996512207274539	0	0.00946686596910812	0.00249128051818635	0.00049825610363727	0.000996512207274539	0	0.00249128051818635	0.00199302441454908	0.00049825610363727	0.00398604882909816	0.000996512207274539	0	0.00199302441454908	0.00249128051818635	0.00249128051818635	0.00149476831091181	0	0	0.0049825610363727	0.00049825610363727	0.00249128051818635	0.00348779272546089	0.000996512207274539	0.00049825610363727	0.00348779272546089	0.000996512207274539	0	0.00797209765819631
LI15J0	0.00919305413687436	0.0122574055158325	0.00970377936670072	0.0760980592441267	0.0817160367722165	0.0076608784473953	0.213483146067416	0.00102145045965271	0.00255362614913177	0	0.00255362614913177	0.0771195097037794	0.00715015321756895	0.00102145045965271	0.00306435137895812	0.00153217568947906	0	0.00102145045965271	0.00102145045965271	0.00102145045965271	0.00204290091930541	0	0.0132788559754852	0.00102145045965271	0.00663942798774259	0.00153217568947906	0	0.000510725229826353	0.00102145045965271	0.00306435137895812	0.00715015321756895	0	0.00153217568947906	0.00153217568947906	0.000510725229826353	0.00357507660878447	0.00306435137895812	0	0	0.00102145045965271	0	0.00255362614913177	0.00357507660878447	0	0.000510725229826353	0.0076608784473953	0.00715015321756895	0.000510725229826353	0.0107252298263534
LI16J0	0.0102272727272727	0.00965909090909091	0.00227272727272727	0.075	0.0488636363636364	0.00511363636363636	0.13125	0.000568181818181818	0.00284090909090909	0	0.00397727272727273	0.0721590909090909	0.00568181818181818	0	0.00284090909090909	0	0	0.000568181818181818	0	0	0	0	0.0426136363636364	0	0.00170454545454545	0.00284090909090909	0	0	0.00284090909090909	0.00227272727272727	0.00795454545454545	0	0	0	0.00454545454545455	0.00284090909090909	0.0125	0	0	0.00227272727272727	0.000568181818181818	0.00170454545454545	0.0551136363636364	0	0	0.00113636363636364	0.000568181818181818	0.00170454545454545	0.0181818181818182
LI17J0	0.0065825562260011	0.00548546352166758	0.00164563905650027	0.0729566648381788	0.0806363137685134	0.00822819528250137	0.166758091058694	0	0.00274273176083379	0	0.00329127811300055	0.0537575425123423	0.015907844212836	0	0.00493691716950082	0.00109709270433352	0.000548546352166758	0	0	0	0.000548546352166758	0	0.0115194733955019	0.00109709270433352	0.000548546352166758	0	0.000548546352166758	0.000548546352166758	0.00603400987383434	0.000548546352166758	0.00438837081733406	0.000548546352166758	0	0.000548546352166758	0.00109709270433352	0.00219418540866703	0.00329127811300055	0	0	0	0	0.00109709270433352	0.00438837081733406	0.000548546352166758	0.00109709270433352	0.00219418540866703	0.00109709270433352	0.000548546352166758	0.0290729566648382
LI21J0	0.00947368421052632	0.0147368421052632	0.0110526315789474	0.08	0.143157894736842	0.00421052631578947	0.00578947368421053	0.00157894736842105	0.02	0	0.00526315789473684	0.0847368421052632	0.0210526315789474	0.000526315789473684	0.00105263157894737	0.00736842105263158	0.00315789473684211	0.00263157894736842	0	0.00210526315789474	0.00105263157894737	0.000526315789473684	0.0231578947368421	0	0.00157894736842105	0.000526315789473684	0	0.00263157894736842	0.00421052631578947	0.00421052631578947	0.00842105263157895	0.000526315789473684	0	0.00105263157894737	0.00210526315789474	0.00473684210526316	0.00368421052631579	0	0	0	0.00157894736842105	0.00894736842105263	0.0068421052631579	0.00105263157894737	0	0.01	0.00210526315789474	0	0.0110526315789474
LI22J0	0.00965665236051502	0.0139484978540773	0.0171673819742489	0.0504291845493562	0.0954935622317597	0.0182403433476395	0.00536480686695279	0	0.00214592274678112	0	0.00536480686695279	0.0536480686695279	0.0160944206008584	0.00214592274678112	0.00107296137339056	0.00214592274678112	0.00321888412017167	0.00643776824034335	0	0	0.00321888412017167	0	0.0268240343347639	0.00214592274678112	0.00107296137339056	0.00321888412017167	0	0.00321888412017167	0.00321888412017167	0.00321888412017167	0.00429184549356223	0.00107296137339056	0	0.00107296137339056	0.00214592274678112	0.00751072961373391	0.00321888412017167	0	0	0	0	0.0118025751072961	0.00214592274678112	0.00214592274678112	0	0.00107296137339056	0	0	0.0128755364806867
LI23J0	0.0130684788290643	0.0162049137480397	0.00679560899111343	0.0815473078933612	0.0355462624150549	0.00418191322530057	0.181390486147412	0.000522739153162572	0.010977522216414	0	0.00470465237846315	0.0914793518034501	0.0240460010454783	0	0.000522739153162572	0.00313643491897543	0.00313643491897543	0.000522739153162572	0	0.00156821745948772	0.00156821745948772	0.000522739153162572	0.010977522216414	0.00418191322530057	0.00418191322530057	0.000522739153162572	0	0.00156821745948772	0.00784108729743858	0.003659174072138	0.00888656560376372	0.00104547830632514	0	0.00104547830632514	0.00209095661265029	0.000522739153162572	0.00731834814427601	0	0	0	0.000522739153162572	0.00679560899111343	0.00313643491897543	0	0	0.0141139571353894	0.00993204391008887	0.000522739153162572	0.003659174072138
LI23J0F	0.15436785845927	0.0495392554367858	0.0936232952451161	0.408345005528935	0.110726133431626	0.00636933284187247	0.0012532252119425	0.0298709915223	0.00917065978621452	0.0262734979727239	0.00129745669001106	0.00263914485809067	0.006015481017324	0.00408403980833026	0.00588278658311832	0.000869885735348323	0.000132694434205676	0.0151271654994471	0	0.0303870254330999	0.00137117582012532	0.000309620346479912	0.00035385182454847	0.000147438260228529	0.000633984518982676	7.37191301142646e-05	0	0.000265388868411353	0.001503870254331	0.000265388868411353	0.000162182086251382	0.000368595650571323	0.00085514190932547	0.000221157390342794	0	4.42314780685588e-05	0.000117950608182823	0.00137117582012532	0	0	7.37191301142646e-05	4.42314780685588e-05	0	0.000633984518982676	0.000280132694434206	0.00340582381127903	0.0012827128639882	2.94876520457059e-05	0.000103206782159971
LI24J0	0.00420328620557891	0.0022927015666794	0.00458540313335881	0.0282766526557126	0.594191822697746	0.000764233855559801	0.0026748184944593	0.000382116927779901	0.00573175391669851	0	0.0026748184944593	0.0320978219335117	0.0133740924722965	0	0.000764233855559801	0.0011463507833397	0.000382116927779901	0.000764233855559801	0.000382116927779901	0.000764233855559801	0.000764233855559801	0	0.00955292319449752	0.000764233855559801	0.0286587695834926	0	0	0	0.00343905235001911	0.0015284677111196	0.0019105846388995	0	0.000382116927779901	0	0.00343905235001911	0.000764233855559801	0.000382116927779901	0	0	0.000764233855559801	0.0011463507833397	0.0011463507833397	0.0019105846388995	0	0.000764233855559801	0.0103171570500573	0	0	0.00382116927779901
LI25J0	0.0208623087621697	0.0159944367176634	0.00764951321279555	0.0737134909596662	0.0361613351877608	0.0132127955493741	0.0709318497913769	0.00139082058414465	0.0152990264255911	0	0.00347705146036161	0.16759388038943	0.00973574408901252	0	0.00139082058414465	0.000695410292072323	0.000695410292072323	0	0	0.00347705146036161	0	0	0.0285118219749652	0.00486787204450626	0	0	0	0.000695410292072323	0.00695410292072323	0.00139082058414465	0.00834492350486787	0.000695410292072323	0	0.00139082058414465	0.00417246175243394	0.00695410292072323	0.00139082058414465	0	0	0	0	0.0146036161335188	0.00834492350486787	0	0.000695410292072323	0.0062586926286509	0.000695410292072323	0.00139082058414465	0.00486787204450626
LI26J0	0.00702576112412178	0.00995316159250586	0.00117096018735363	0.085480093676815	0.0140515222482436	0.00936768149882904	0.0386416861826698	0	0.00292740046838408	0	0.00175644028103044	0.133489461358314	0.00761124121779859	0.00117096018735363	0.00644028103044497	0	0.00351288056206089	0.000585480093676815	0	0.00117096018735363	0	0.00117096018735363	0.0755269320843091	0.00175644028103044	0	0.00234192037470726	0	0.00117096018735363	0	0.00644028103044497	0.0181498829039813	0.000585480093676815	0	0.00761124121779859	0.00585480093676815	0.00702576112412178	0.0140515222482436	0.00117096018735363	0	0.00175644028103044	0.000585480093676815	0.0240046838407494	0.00702576112412178	0	0.00175644028103044	0.00117096018735363	0.00117096018735363	0.000585480093676815	0.015807962529274
LI27J0	0.00776196636481242	0.0213454075032342	0.00840879689521345	0.0750323415265201	0.0485122897800776	0.00388098318240621	0.00323415265200517	0.00129366106080207	0.0116429495472186	0	0.0019404915912031	0.074385510996119	0.00905562742561449	0	0	0.0019404915912031	0.000646830530401035	0	0	0.00258732212160414	0.0019404915912031	0.00258732212160414	0.01875808538163	0.00258732212160414	0.00323415265200517	0	0.00129366106080207	0.0019404915912031	0.00452781371280724	0.000646830530401035	0.00840879689521345	0.000646830530401035	0	0	0.00258732212160414	0.00258732212160414	0.00517464424320828	0	0	0.00388098318240621	0.00129366106080207	0.00840879689521345	0.00323415265200517	0	0	0.00452781371280724	0.00258732212160414	0	0.0148771021992238
M221J0	0.00164609053497942	0.00329218106995885	0.00493827160493827	0.273251028806584	0.037037037037037	0.0065843621399177	0.0337448559670782	0.00246913580246914	0.00823045267489712	0	0.00905349794238683	0.0411522633744856	0.011522633744856	0	0.00164609053497942	0.0378600823045267	0.0576131687242798	0	0	0	0.000823045267489712	0	0.0148148148148148	0.000823045267489712	0.00164609053497942	0.00246913580246914	0	0.00164609053497942	0	0.00329218106995885	0.00329218106995885	0	0	0.00411522633744856	0.00329218106995885	0.00329218106995885	0.00493827160493827	0.00246913580246914	0	0.000823045267489712	0.000823045267489712	0.00329218106995885	0.00329218106995885	0	0.000823045267489712	0.00493827160493827	0.00493827160493827	0	0.00740740740740741
M222J0	0.00779220779220779	0.0103896103896104	0.00649350649350649	0.0961038961038961	0.051948051948052	0.0038961038961039	0.0324675324675325	0.0025974025974026	0.0311688311688312	0	0.0285714285714286	0.0935064935064935	0.0181818181818182	0.0012987012987013	0	0.0454545454545455	0.074025974025974	0	0	0	0	0.0038961038961039	0.00779220779220779	0	0.0012987012987013	0	0	0.0025974025974026	0	0	0	0.0012987012987013	0	0.00519480519480519	0.0025974025974026	0	0.0025974025974026	0	0	0	0	0.0038961038961039	0.0025974025974026	0.0025974025974026	0	0.00779220779220779	0.00779220779220779	0	0.0025974025974026
M223J0	0.0070635721493441	0.00605449041372351	0.00403632694248234	0.262361251261352	0.029263370332997	0.00403632694248234	0.0373360242179617	0	0.012108980827447	0	0.0141271442986882	0.0454086781029263	0.012108980827447	0.00100908173562059	0	0.024217961654894	0.0524722502522704	0.00201816347124117	0	0.00100908173562059	0.00302724520686176	0	0.0161453077699294	0.00100908173562059	0	0	0.00201816347124117	0.00302724520686176	0	0.00100908173562059	0.00201816347124117	0.00100908173562059	0	0.00201816347124117	0.00201816347124117	0.00201816347124117	0.00807265388496468	0.0070635721493441	0	0.00605449041372351	0	0.00403632694248234	0.00201816347124117	0.00302724520686176	0	0.0100908173562059	0.00403632694248234	0	0.00201816347124117
M224J0	0.00315855969677827	0.00947567909033481	0.00315855969677827	0.307012002526848	0.0290587492103601	0.00758054327226785	0.0227416298168035	0	0.00884396715097915	0	0.018319646241314	0.063802905874921	0.0101073910296905	0	0	0.0176879343019583	0.0555906506632975	0.00189513581806696	0	0	0.00126342387871131	0.00126342387871131	0.00884396715097915	0.00126342387871131	0	0.000631711939355654	0.000631711939355654	0	0.00189513581806696	0.000631711939355654	0.00315855969677827	0	0.000631711939355654	0	0.00189513581806696	0.00568540745420088	0.00189513581806696	0.00126342387871131	0	0	0.000631711939355654	0.00126342387871131	0.0082122552116235	0.00442198357548958	0	0.0082122552116235	0.00252684775742262	0	0.00252684775742262
M225J0	0.0155763239875389	0.00155763239875389	0.00623052959501558	0.088785046728972	0.0467289719626168	0.00155763239875389	0.0264797507788162	0	0.0233644859813084	0	0	0.0965732087227414	0.0249221183800623	0	0	0.00778816199376947	0.0342679127725857	0	0	0	0.00467289719626168	0	0.0124610591900312	0	0	0	0	0	0	0	0.00467289719626168	0	0.00155763239875389	0	0.00467289719626168	0.00311526479750779	0.0109034267912773	0.00623052959501558	0	0.00467289719626168	0	0.00155763239875389	0.0171339563862928	0	0	0.00623052959501558	0.00155763239875389	0	0
M226J0	0.00487012987012987	0.00974025974025974	0.00649350649350649	0.0762987012987013	0.0827922077922078	0.00162337662337662	0.0438311688311688	0	0.0113636363636364	0	0.0162337662337662	0.0827922077922078	0.00487012987012987	0	0	0.0178571428571429	0.0746753246753247	0	0	0.00324675324675325	0.00324675324675325	0	0.00162337662337662	0.00162337662337662	0	0	0	0	0	0.00162337662337662	0.0146103896103896	0	0	0	0.00811688311688312	0.00162337662337662	0.00487012987012987	0.00487012987012987	0	0	0	0.00324675324675325	0.00487012987012987	0	0.00324675324675325	0.00487012987012987	0.00324675324675325	0	0
M227J0	0.003003003003003	0.00600600600600601	0.00900900900900901	0.0720720720720721	0.045045045045045	0.00600600600600601	0.033033033033033	0.003003003003003	0.015015015015015	0	0.0255255255255255	0.0840840840840841	0.00900900900900901	0	0	0.0165165165165165	0.0435435435435435	0.0135135135135135	0.0015015015015015	0	0.00600600600600601	0	0.0495495495495495	0	0	0	0.0015015015015015	0.00600600600600601	0	0.0015015015015015	0	0	0	0.003003003003003	0.003003003003003	0.0015015015015015	0.0045045045045045	0.0045045045045045	0	0	0	0	0.0015015015015015	0.003003003003003	0	0.0045045045045045	0.0015015015015015	0	0.0165165165165165
M71J0	0.00182815356489945	0.00731261425959781	0.00822669104204753	0.0923217550274223	0.0603290676416819	0	0.0237659963436929	0.0173674588665448	0.0109689213893967	0.000914076782449726	0.0036563071297989	0.0877513711151737	0.020109689213894	0	0	0.00182815356489945	0.000914076782449726	0.000914076782449726	0	0.00182815356489945	0.00274223034734918	0	0.0475319926873857	0.000914076782449726	0.0118829981718464	0.00182815356489945	0	0	0.000914076782449726	0.000914076782449726	0.00639853747714808	0	0	0	0.0036563071297989	0.00274223034734918	0.00639853747714808	0	0.00639853747714808	0.0036563071297989	0.00274223034734918	0	0.00639853747714808	0	0.0036563071297989	0.00548446069469835	0.000914076782449726	0.00182815356489945	0.0118829981718464
M72J0	0.0141010575793184	0.0199764982373678	0.0117508813160987	0.0693301997649824	0.0846063454759107	0.00470035252643948	0.0129259694477086	0.0176263219741481	0.0117508813160987	0.00235017626321974	0.00352526439482961	0.063454759106933	0.0223266745005875	0	0	0.00352526439482961	0	0.00117508813160987	0	0.00235017626321974	0.00940070505287897	0.00235017626321974	0.0540540540540541	0	0.00235017626321974	0.00352526439482961	0	0	0.00235017626321974	0.00352526439482961	0.00940070505287897	0	0	0	0.00587544065804935	0	0.00470035252643948	0	0	0	0	0.00117508813160987	0.00117508813160987	0.00352526439482961	0	0.0082256169212691	0	0.00117508813160987	0.00587544065804935
M73J0	0.0159529806884971	0.0151133501259446	0.0142737195633921	0.0965575146935348	0.0713685978169605	0.00419815281276238	0.00587741393786734	0.00923593618807725	0.00251889168765743	0.00167926112510495	0.00839630562552477	0.116708648194794	0.0125944584382872	0.000839630562552477	0.00251889168765743	0.017632241813602	0.00167926112510495	0.00251889168765743	0	0.00167926112510495	0.00419815281276238	0	0.0570948782535684	0	0.000839630562552477	0.00167926112510495	0	0.00251889168765743	0.00167926112510495	0.00251889168765743	0.0117548278757347	0.00167926112510495	0	0.00335852225020991	0.00251889168765743	0.00755667506297229	0.00587741393786734	0	0	0	0.000839630562552477	0.00167926112510495	0.00335852225020991	0	0.00167926112510495	0.00251889168765743	0	0	0.0235096557514694
M74J0	0.00621890547263682	0.013681592039801	0.00497512437810945	0.0509950248756219	0.0845771144278607	0	0.00870646766169154	0.00497512437810945	0.00995024875621891	0.00497512437810945	0.00497512437810945	0.0883084577114428	0.0149253731343284	0	0.00124378109452736	0.00373134328358209	0.00248756218905473	0.00248756218905473	0	0	0.00248756218905473	0.00746268656716418	0.0509950248756219	0.00124378109452736	0.00497512437810945	0.00124378109452736	0.00373134328358209	0	0.00248756218905473	0.00497512437810945	0.00746268656716418	0.00124378109452736	0	0	0	0.00497512437810945	0.00373134328358209	0	0	0	0	0.00373134328358209	0.00124378109452736	0.00124378109452736	0	0.00124378109452736	0.00870646766169154	0.00124378109452736	0.0124378109452736
M75J0	0.0103448275862069	0.00344827586206897	0.00804597701149425	0.0586206896551724	0.117241379310345	0.0114942528735632	0.0183908045977011	0.00229885057471264	0.00689655172413793	0.110344827586207	0.00114942528735632	0.0494252873563218	0.0103448275862069	0	0	0.00574712643678161	0	0.00229885057471264	0	0	0.00114942528735632	0.00919540229885057	0.0241379310344828	0.00114942528735632	0.00114942528735632	0.00114942528735632	0	0	0.00114942528735632	0.00114942528735632	0.00919540229885057	0	0	0	0.00574712643678161	0	0.00459770114942529	0	0	0	0.00114942528735632	0.00459770114942529	0.00459770114942529	0.00229885057471264	0.00114942528735632	0.00114942528735632	0.00114942528735632	0	0.0126436781609195
M76J0	0.00813008130081301	0.0111788617886179	0.00711382113821138	0.0619918699186992	0.0213414634146341	0.0101626016260163	0.0132113821138211	0.0264227642276423	0.0132113821138211	0	0.00304878048780488	0.0853658536585366	0.0142276422764228	0	0	0.0040650406504065	0.00101626016260163	0.00304878048780488	0.00304878048780488	0.00304878048780488	0.00203252032520325	0	0.0711382113821138	0.00101626016260163	0.00508130081300813	0	0.00101626016260163	0	0	0.00203252032520325	0.00609756097560976	0.00101626016260163	0	0	0	0.00304878048780488	0.0111788617886179	0	0	0	0	0.00304878048780488	0.00609756097560976	0	0	0.0040650406504065	0.00609756097560976	0.00203252032520325	0.00609756097560976
M77J0	0.00423280423280423	0.00740740740740741	0.00423280423280423	0.0560846560846561	0.0783068783068783	0.0105820105820106	0.00952380952380952	0.00317460317460317	0.0116402116402116	0.0211640211640212	0.00634920634920635	0.0666666666666667	0.00740740740740741	0	0.00105820105820106	0.00105820105820106	0.00423280423280423	0.00211640211640212	0	0.00105820105820106	0	0.00105820105820106	0.0507936507936508	0	0.00423280423280423	0	0	0	0	0	0.0169312169312169	0	0.00105820105820106	0.00529100529100529	0.00423280423280423	0	0.00846560846560847	0	0	0	0	0.00105820105820106	0.00846560846560847	0	0	0.00423280423280423	0.00105820105820106	0	0.0148148148148148
M81J0	0.00963081861958266	0.0192616372391653	0.0120385232744783	0.101123595505618	0.0385232744783307	0.007223113964687	0.0232744783306581	0.000802568218298555	0.0112359550561798	0.0232744783306581	0.00561797752808989	0.0947030497592295	0.0160513643659711	0	0.00160513643659711	0.0176565008025682	0.00481540930979133	0.00160513643659711	0.000802568218298555	0.00240770465489567	0.00561797752808989	0.000802568218298555	0.00481540930979133	0.000802568218298555	0.00321027287319422	0	0	0.00321027287319422	0.000802568218298555	0.00321027287319422	0.00561797752808989	0	0.000802568218298555	0.00481540930979133	0.00321027287319422	0.00321027287319422	0.00240770465489567	0	0	0.00160513643659711	0	0.00160513643659711	0.00321027287319422	0	0	0.00481540930979133	0.00160513643659711	0.000802568218298555	0.0248796147672552
M82J0	0.00648298217179903	0.0113452188006483	0.0113452188006483	0.0777957860615883	0.0162074554294976	0.00810372771474878	0.00486223662884927	0.00162074554294976	0.00972447325769854	0.0243111831442464	0.00486223662884927	0.0713128038897893	0.0113452188006483	0	0.00162074554294976	0.00972447325769854	0	0.00162074554294976	0	0	0.00162074554294976	0	0.0129659643435981	0.00162074554294976	0.00324149108589951	0	0	0.00324149108589951	0.00486223662884927	0.00810372771474878	0.00486223662884927	0	0.00324149108589951	0	0.00324149108589951	0	0	0.00486223662884927	0.00162074554294976	0.00324149108589951	0	0	0.00648298217179903	0	0	0	0.00324149108589951	0	0.0194489465153971
M83J0	0.0116086235489221	0.0116086235489221	0.0356550580431177	0.102819237147595	0.066334991708126	0.00746268656716418	0.0107794361525705	0.00248756218905473	0.0140961857379768	0.0033167495854063	0.00995024875621891	0.0771144278606965	0.0116086235489221	0	0.000829187396351575	0.00829187396351575	0.00165837479270315	0.00248756218905473	0	0.00248756218905473	0.00248756218905473	0	0.0124378109452736	0.00165837479270315	0.00248756218905473	0	0.00580431177446103	0	0	0.00497512437810945	0.00995024875621891	0	0.00248756218905473	0.000829187396351575	0.00248756218905473	0.0132669983416252	0.00746268656716418	0	0	0	0	0.0033167495854063	0.00746268656716418	0	0	0.00912106135986733	0.00580431177446103	0	0.0306799336650083
M84J0	0.0146666666666667	0.00533333333333333	0.00133333333333333	0.0986666666666667	0.052	0.004	0.012	0	0.00133333333333333	0	0.00266666666666667	0.084	0.008	0	0.00666666666666667	0.00533333333333333	0.004	0.00133333333333333	0	0	0.00133333333333333	0.00266666666666667	0.0146666666666667	0.00133333333333333	0	0.00133333333333333	0	0	0	0.00933333333333333	0.00533333333333333	0	0	0	0.00666666666666667	0.00666666666666667	0.004	0	0	0.0133333333333333	0	0.004	0.008	0	0.00266666666666667	0	0.00133333333333333	0	0.036
M85J0	0.00253807106598985	0.0050761421319797	0.00126903553299492	0.065989847715736	0.0736040609137056	0.00253807106598985	0.00380710659898477	0.00253807106598985	0.0126903553299492	0.0126903553299492	0.00253807106598985	0.111675126903553	0.0126903553299492	0.00126903553299492	0	0.00634517766497462	0	0	0	0	0.00126903553299492	0.00126903553299492	0.00888324873096447	0.00126903553299492	0.0050761421319797	0	0	0.00126903553299492	0	0.00126903553299492	0.0050761421319797	0	0.00126903553299492	0	0.0050761421319797	0.0050761421319797	0.00888324873096447	0	0	0	0	0.0050761421319797	0.00761421319796954	0	0	0	0	0	0.0266497461928934
M86J0	0.00185528756957328	0.0139146567717996	0.0120593692022263	0.0417439703153989	0.0695732838589982	0.0139146567717996	0.0287569573283859	0	0.00649350649350649	0.0602968460111317	0.00556586270871985	0.0528756957328386	0.0185528756957328	0.000927643784786642	0.000927643784786642	0.00649350649350649	0.00556586270871985	0.00556586270871985	0	0.000927643784786642	0.00185528756957328	0	0.00463821892393321	0.00185528756957328	0.00185528756957328	0.000927643784786642	0.00185528756957328	0.00278293135435993	0	0.00185528756957328	0.00185528756957328	0	0	0	0.00556586270871985	0.00278293135435993	0.00278293135435993	0	0	0	0.000927643784786642	0.000927643784786642	0.00463821892393321	0	0	0	0.00185528756957328	0	0.0176252319109462
M87J0	0.00791855203619909	0.0169683257918552	0.0124434389140271	0.0972850678733032	0.0542986425339367	0.0384615384615385	0.0113122171945701	0	0.0169683257918552	0.0350678733031674	0.00452488687782805	0.113122171945701	0.0135746606334842	0	0	0.00678733031674208	0.00904977375565611	0	0	0	0.00226244343891403	0.00113122171945701	0.00904977375565611	0	0.00339366515837104	0.00113122171945701	0	0	0.00226244343891403	0.00226244343891403	0.00339366515837104	0.00339366515837104	0.00226244343891403	0.00226244343891403	0.00565610859728507	0.00452488687782805	0.00339366515837104	0.00226244343891403	0	0.00904977375565611	0	0	0.00113122171945701	0	0	0.00226244343891403	0	0.00113122171945701	0.0158371040723982
[truncated: 497 more columns]

## Sheet: Eggshell_T4_relative abundances
SampleID	Bacteria,Firmicutes,Bacilli,Lactobacillales,Streptococcaceae,Streptococcus	Bacteria,Firmicutes,Clostridia,Clostridiales,Peptostreptococcaceae,Romboutsia	Bacteria,Firmicutes,Bacilli,Lactobacillales,Enterococcaceae,Enterococcus	Bacteria,Actinobacteria,Actinobacteria,Actinomycetales,Corynebacteriaceae,Corynebacterium	Bacteria,Firmicutes,Bacilli,Lactobacillales,Lactobacillaceae,Lactobacillus	Bacteria,Firmicutes,Erysipelotrichia,Erysipelotrichales,Erysipelotrichaceae,Turicibacter	Bacteria,Actinobacteria,Actinobacteria,Actinomycetales,Dermabacteraceae,Brachybacterium	Bacteria,Proteobacteria,Gammaproteobacteria,Enterobacteriales,Enterobacteriaceae,Enterobacteriaceae_unclassified	Bacteria,Firmicutes,Clostridia,Clostridiales,Clostridiaceae_1,Clostridium_sensu_stricto	Bacteria,Firmicutes,Bacilli,Bacillales,Staphylococcaceae,Staphylococcus	Bacteria,Proteobacteria,Gammaproteobacteria,Pasteurellales,Pasteurellaceae,Gallibacterium	Bacteria,Actinobacteria,Actinobacteria,Actinomycetales,Micrococcaceae,Yaniella	Bacteria,Firmicutes,Clostridia,Clostridiales,Lachnospiraceae,Lachnospiraceae_unclassified	Bacteria,Firmicutes,Bacilli,Bacillales,Staphylococcaceae,Jeotgalicoccus	Bacteria,Firmicutes,Clostridia,Clostridiales,Peptostreptococcaceae,Terrisporobacter	Bacteria,Fusobacteria,Fusobacteriia,Fusobacteriales,Fusobacteriaceae,Fusobacterium	Bacteria,Actinobacteria,Actinobacteria,Actinomycetales,Brevibacteriaceae,Brevibacterium	Bacteria,Firmicutes,Bacilli,Bacillales,Staphylococcaceae,Salinicoccus	Bacteria,Firmicutes,Bacilli,Bacillales,Bacillaceae_1,Bacillus	Bacteria,Actinobacteria,Actinobacteria,Bifidobacteriales,Bifidobacteriaceae,Bifidobacterium	Bacteria,Actinobacteria,Actinobacteria,Actinomycetales,Dietziaceae,Dietzia	Bacteria,Actinobacteria,Actinobacteria,Coriobacteriales,Coriobacteriaceae,Olsenella	Bacteria,Bacteroidetes,Bacteroidia,Bacteroidales,Bacteroidaceae,Bacteroides	Bacteria,Firmicutes,Negativicutes,Selenomonadales,Acidaminococcaceae,Acidaminococcaceae_unclassified	Bacteria,Proteobacteria,Gammaproteobacteria,Pseudomonadales,Moraxellaceae,Psychrobacter	Bacteria,Proteobacteria,Deltaproteobacteria,Desulfovibrionales,Desulfovibrionaceae,Desulfovibrio	Bacteria,Proteobacteria,Gammaproteobacteria,Enterobacteriales,Enterobacteriaceae,Salmonella	Bacteria,Firmicutes,Clostridia,Clostridiales,Peptococcaceae_1,Peptococcus	Bacteria,Firmicutes,Bacilli,Lactobacillales,Aerococcaceae,Facklamia	Bacteria,Actinobacteria,Actinobacteria,Coriobacteriales,Coriobacteriaceae,Collinsella	Archaea,Euryarchaeota,Methanobacteria,Methanobacteriales,Methanobacteriaceae,Methanobrevibacter	Bacteria,Actinobacteria,Actinobacteria,Bifidobacteriales,Bifidobacteriaceae,Aeriscardovia	Bacteria,Firmicutes,Erysipelotrichia,Erysipelotrichales,Erysipelotrichaceae,Clostridium_XVIII	Bacteria,Firmicutes,Clostridia,Clostridiales,Ruminococcaceae,Pseudoflavonifractor	Bacteria,Firmicutes,Clostridia,Clostridiales,Ruminococcaceae,Faecalibacterium	Bacteria,Firmicutes,Erysipelotrichia,Erysipelotrichales,Erysipelotrichaceae,Erysipelotrichaceae_unclassified	Bacteria,Firmicutes,Negativicutes,Selenomonadales,Veillonellaceae,Veillonella	Bacteria,Firmicutes,Bacilli,Bacillales,Listeriaceae,Listeria	Bacteria,Proteobacteria,Gammaproteobacteria,Aeromonadales,Aeromonadaceae,Aeromonadaceae_unclassified	Bacteria,Bacteroidetes,Bacteroidia,Bacteroidales,Prevotellaceae,Prevotella	Bacteria,Firmicutes,Clostridia,Clostridiales,Ruminococcaceae,Intestinimonas	Bacteria,Bacteroidetes,Bacteroidia,Bacteroidales,Rikenellaceae,Alistipes	Bacteria,Firmicutes,Clostridia,Clostridiales,Ruminococcaceae,Butyricicoccus	Bacteria,Actinobacteria,Actinobacteria,Actinomycetales,Actinomycetaceae,Actinomyces	Bacteria,Firmicutes,Erysipelotrichia,Erysipelotrichales,Erysipelotrichaceae,Faecalitalea	Bacteria,Firmicutes,Bacilli,Bacilli_unclassified,Bacilli_unclassified,Bacilli_unclassified	Bacteria,Actinobacteria,Actinobacteria,Actinomycetales,Nocardiopsaceae,Nocardiopsis	Bacteria,Synergistetes,Synergistia,Synergistales,Synergistaceae,Cloacibacillus	Bacteria,Bacteroidetes,Bacteroidia,Bacteroidales,Porphyromonadaceae,Porphyromonadaceae_unclassified
48B14sem	0.00609137055837563	0.00203045685279188	0.00812182741116751	0.144162436548223	0.0609137055837563	0.0101522842639594	0.00304568527918782	0.00203045685279188	0	0.00913705583756345	0.00101522842639594	0.00203045685279188	0.104568527918782	0.0101522842639594	0	0	0	0.00304568527918782	0	0	0.00101522842639594	0.00406091370558376	0.0192893401015228	0.00203045685279188	0.00101522842639594	0.00203045685279188	0	0.00101522842639594	0.00101522842639594	0.00406091370558376	0	0.00101522842639594	0	0	0.0050761421319797	0.00203045685279188	0	0	0	0	0.00203045685279188	0	0.0111675126903553	0	0	0.00101522842639594	0.00913705583756345	0.00609137055837563	0.0152284263959391
48B24sem	0.00476190476190476	0.017687074829932	0.0054421768707483	0.122448979591837	0.0666666666666667	0.00340136054421769	0.0054421768707483	0	0.000680272108843537	0.00612244897959184	0	0.00476190476190476	0.0775510204081633	0.019047619047619	0	0	0.00272108843537415	0.00816326530612245	0	0	0	0	0.0210884353741497	0.000680272108843537	0.00272108843537415	0.00136054421768707	0	0	0.00340136054421769	0.00340136054421769	0.000680272108843537	0	0.00136054421768707	0.00748299319727891	0.00612244897959184	0.00680272108843537	0	0	0	0	0	0.0054421768707483	0.0054421768707483	0.000680272108843537	0	0.00272108843537415	0.0122448979591837	0	0.00884353741496599
48B34sem	0.0104463437796771	0.0208926875593542	0.00379867046533713	0.0161443494776828	0.0617283950617284	0.0170940170940171	0.0056980056980057	0	0.00189933523266857	0.00949667616334283	0.00474833808167141	0	0.0835707502374169	0.0189933523266857	0	0.000949667616334283	0.000949667616334283	0.00379867046533713	0	0.000949667616334283	0.000949667616334283	0.000949667616334283	0.0246913580246914	0.00189933523266857	0.00379867046533713	0	0	0	0	0.00664767331433998	0.000949667616334283	0	0.00949667616334283	0.0151946818613485	0.000949667616334283	0.0056980056980057	0	0.00379867046533713	0.00189933523266857	0.00189933523266857	0.00189933523266857	0	0.00474833808167141	0	0	0.00664767331433998	0.00949667616334283	0	0.0113960113960114
48B44sem	0.00436953807740325	0.0131086142322097	0.00187265917602996	0.0449438202247191	0.0605493133583021	0.00499375780274657	0.00811485642946317	0.00374531835205993	0.00124843945068664	0.00998751560549313	0	0.00187265917602996	0.0692883895131086	0.0118601747815231	0	0	0	0.00436953807740325	0.000624219725343321	0.0031210986267166	0	0	0.0249687890137328	0.000624219725343321	0.000624219725343321	0.000624219725343321	0	0.00124843945068664	0.00187265917602996	0.00499375780274657	0	0	0.00187265917602996	0.00187265917602996	0.00624219725343321	0.00811485642946317	0	0.00124843945068664	0	0	0	0.00249687890137328	0.00624219725343321	0	0.000624219725343321	0.00436953807740325	0.0031210986267166	0.00686641697877653	0.00873907615480649
48B54sem	0.00199401794616152	0.00797607178464606	0.00398803589232303	0.166500498504487	0.0498504486540379	0.00598205383848455	0.00299102691924227	0.00199401794616152	0.000997008973080758	0.00897308075772682	0	0.00199401794616152	0.0687936191425723	0.0139581256231306	0	0	0	0.00398803589232303	0	0	0	0	0.0229312063808574	0	0.00498504486540379	0.00498504486540379	0	0	0.00398803589232303	0.0119641076769691	0	0	0.00598205383848455	0.00498504486540379	0	0.00997008973080758	0	0	0.00199401794616152	0.00199401794616152	0	0.0069790628115653	0.00299102691924227	0	0	0.00299102691924227	0.0109670987038883	0.00299102691924227	0.00498504486540379
48B64sem	0.0066711140760507	0.00867244829886591	0.00600400266844563	0.0246831220813876	0.0893929286190794	0.0126751167444963	0.00133422281521014	0	0.00266844563042028	0.00933955970647098	0	0.00533689126084056	0.0640426951300867	0.018679119412942	0	0.00266844563042028	0.00066711140760507	0.00066711140760507	0	0.00066711140760507	0.00066711140760507	0.00066711140760507	0.0280186791194129	0.00133422281521014	0.00466977985323549	0.132755170113409	0	0	0.00133422281521014	0.00466977985323549	0	0	0.00200133422281521	0.00266844563042028	0.00333555703802535	0.00867244829886591	0	0	0	0.00133422281521014	0.00066711140760507	0.00466977985323549	0.00933955970647098	0	0	0.00200133422281521	0.00533689126084056	0.00133422281521014	0.00466977985323549
48B74sem	0.010648596321394	0.010648596321394	0.00484027105517909	0.0445304937076476	0.0590513068731849	0.0174249757986447	0.00774443368828654	0	0.00387221684414327	0.00580832526621491	0	0.00484027105517909	0.0909970958373669	0.00580832526621491	0	0	0.00193610842207164	0.000968054211035818	0	0.000968054211035818	0.000968054211035818	0.000968054211035818	0.0222652468538238	0.000968054211035818	0.00484027105517909	0.000968054211035818	0	0	0.00580832526621491	0.00968054211035818	0	0	0	0.00387221684414327	0.00290416263310745	0.00484027105517909	0	0	0	0	0	0.00484027105517909	0.00580832526621491	0	0.000968054211035818	0.00193610842207164	0.010648596321394	0.00774443368828654	0.00290416263310745
48C14sem	0.0187891440501044	0.0177453027139875	0.0782881002087683	0.162839248434238	0.0918580375782881	0.0135699373695198	0.0177453027139875	0	0.011482254697286	0.0198329853862213	0.00104384133611691	0.011482254697286	0.0271398747390397	0.0281837160751566	0.00313152400835073	0	0.00835073068893528	0.0688935281837161	0	0	0.00835073068893528	0	0.00313152400835073	0	0.00939457202505219	0	0	0.00313152400835073	0.00104384133611691	0.00104384133611691	0	0	0	0	0.00417536534446764	0.00417536534446764	0	0	0	0	0	0	0.00208768267223382	0	0	0.0574112734864301	0.00104384133611691	0.00208768267223382	0.00104384133611691
48C24sem	0.0211640211640212	0.0317460317460317	0.0793650793650794	0.128306878306878	0.121693121693122	0.0224867724867725	0.0198412698412698	0	0.0277777777777778	0.037037037037037	0.00132275132275132	0.0105820105820106	0.0277777777777778	0.00661375661375661	0.00925925925925926	0.00925925925925926	0.0185185185185185	0.0767195767195767	0	0.00396825396825397	0.00132275132275132	0	0.00925925925925926	0	0.00264550264550265	0.00793650793650794	0.00132275132275132	0	0.00396825396825397	0.00264550264550265	0	0	0	0	0	0.00529100529100529	0	0	0.00264550264550265	0.00132275132275132	0.00132275132275132	0	0.00132275132275132	0.00396825396825397	0	0.0542328042328042	0.00132275132275132	0	0
48C34sem	0.00449640287769784	0.0152877697841727	0.0305755395683453	0.072841726618705	0.10341726618705	0.00809352517985612	0.0170863309352518	0	0.0107913669064748	0.0152877697841727	0	0.0107913669064748	0.0611510791366906	0.0134892086330935	0.00269784172661871	0.00179856115107914	0.00269784172661871	0.052158273381295	0.00179856115107914	0	0.00179856115107914	0.000899280575539568	0.0143884892086331	0.000899280575539568	0.00179856115107914	0.00269784172661871	0.00179856115107914	0	0.00359712230215827	0.00809352517985612	0	0	0.00179856115107914	0.00359712230215827	0.00629496402877698	0.00719424460431655	0	0	0.00269784172661871	0	0.000899280575539568	0.000899280575539568	0.000899280575539568	0	0.000899280575539568	0.0161870503597122	0.00719424460431655	0.00269784172661871	0.000899280575539568
48C44sem	0.00216216216216216	0.00864864864864865	0.00972972972972973	0.0291891891891892	0.0583783783783784	0.00108108108108108	0.0205405405405405	0.00324324324324324	0.00216216216216216	0.0194594594594595	0	0.0151351351351351	0.0572972972972973	0.012972972972973	0	0	0.0108108108108108	0.0572972972972973	0	0.00648648648648649	0.00432432432432432	0	0.0302702702702703	0	0.00324324324324324	0	0.00216216216216216	0	0	0.0108108108108108	0	0	0.00108108108108108	0.00324324324324324	0	0.00648648648648649	0	0	0	0	0	0.00216216216216216	0	0	0	0.00324324324324324	0.0108108108108108	0.00108108108108108	0
48C54sem	0.000827814569536424	0.00413907284768212	0.00662251655629139	0.0298013245033113	0.054635761589404	0.00165562913907285	0.00745033112582781	0	0.000827814569536424	0.00910596026490066	0.000827814569536424	0.0033112582781457	0.0653973509933775	0.0231788079470199	0	0	0.0554635761589404	0.0322847682119205	0	0.0033112582781457	0	0.000827814569536424	0.0173841059602649	0.000827814569536424	0.00496688741721854	0.0364238410596026	0	0.000827814569536424	0.0033112582781457	0.00579470198675497	0	0	0.00165562913907285	0.000827814569536424	0.00165562913907285	0.00745033112582781	0	0	0	0	0.000827814569536424	0.00496688741721854	0.000827814569536424	0.00165562913907285	0	0.00662251655629139	0.00993377483443709	0.00165562913907285	0.0033112582781457
48C64sem	0.0130612244897959	0.00244897959183673	0.0106122448979592	0.0922448979591837	0.0530612244897959	0.00979591836734694	0.0114285714285714	0.00489795918367347	0.00979591836734694	0.00816326530612245	0.000816326530612245	0.0171428571428571	0.0538775510204082	0.0106122448979592	0	0	0	0.0244897959183673	0.00163265306122449	0.000816326530612245	0	0	0.0261224489795918	0.000816326530612245	0.00408163265306122	0.0693877551020408	0.00489795918367347	0.000816326530612245	0.00571428571428571	0.0106122448979592	0	0	0.000816326530612245	0.00408163265306122	0	0.00897959183673469	0	0	0.000816326530612245	0	0.000816326530612245	0.00489795918367347	0.00408163265306122	0	0	0.00408163265306122	0.00489795918367347	0.00326530612244898	0.00326530612244898
48C74sem	0.0072463768115942	0.0062111801242236	0.0124223602484472	0.0372670807453416	0.0734989648033126	0.0165631469979296	0.0124223602484472	0.0020703933747412	0.0041407867494824	0.0082815734989648	0	0.010351966873706	0.0703933747412008	0.0165631469979296	0.0031055900621118	0.0010351966873706	0.0093167701863354	0.0424430641821946	0	0.005175983436853	0.0031055900621118	0.0010351966873706	0.0227743271221532	0.0010351966873706	0.0113871635610766	0.0010351966873706	0	0	0.0020703933747412	0.0227743271221532	0	0.0010351966873706	0.0031055900621118	0.0010351966873706	0	0.0144927536231884	0	0	0	0.0010351966873706	0.0020703933747412	0.0020703933747412	0.0020703933747412	0.0020703933747412	0.0020703933747412	0.0041407867494824	0.0010351966873706	0.0031055900621118	0.005175983436853
48D14sem	0.00173761946133797	0.0130321459600348	0.00955690703735882	0.0312771503040834	0.0556038227628149	0.0104257167680278	0.0373588184187663	0.00173761946133797	0.00695047784535187	0.00347523892267593	0	0.00868809730668984	0.0790616854908775	0.0156385751520417	0.00173761946133797	0	0.05125977410947	0.0208514335360556	0	0.00955690703735882	0.0052128583840139	0.000868809730668983	0.00173761946133797	0	0.00347523892267593	0.00260642919200695	0	0.000868809730668983	0.00260642919200695	0.0225890529973936	0	0	0	0.000868809730668983	0	0.00173761946133797	0	0	0.000868809730668983	0	0.00173761946133797	0	0.0139009556907037	0.000868809730668983	0	0.0121633362293658	0.00260642919200695	0.00173761946133797	0
48D24sem	0.00448765893792072	0.0104712041884817	0.00673148840688108	0.0493642483171279	0.0531039640987285	0.00074794315632012	0.0344053851907255	0.00074794315632012	0.0074794315632012	0.00149588631264024	0	0.0172026925953628	0.037397157816006	0.0037397157816006	0	0	0.0344053851907255	0.0538519072550486	0	0.00299177262528048	0.00523560209424084	0	0.00897531787584144	0	0.00149588631264024	0.00149588631264024	0	0.00074794315632012	0	0.0112191473448018	0	0	0.00074794315632012	0.00074794315632012	0.00523560209424084	0.00074794315632012	0	0	0.00074794315632012	0	0	0	0.00074794315632012	0.00822737471952132	0.00299177262528048	0.00523560209424084	0.00224382946896036	0.00074794315632012	0
48D34sem	0.00212201591511936	0.00795755968169761	0.00583554376657825	0.036604774535809	0.0461538461538462	0.0153846153846154	0.0270557029177719	0.000530503978779841	0.00106100795755968	0.00742705570291777	0	0.0122015915119363	0.0302387267904509	0.00901856763925729	0.00106100795755968	0	0.0572944297082228	0.0355437665782493	0.00106100795755968	0.00742705570291777	0.00212201591511936	0.00106100795755968	0.00477453580901857	0.000530503978779841	0.00159151193633952	0	0.000530503978779841	0	0.000530503978779841	0.0111405835543767	0	0	0.00159151193633952	0.00106100795755968	0.000530503978779841	0.00795755968169761	0	0	0.0026525198938992	0.000530503978779841	0	0	0.00212201591511936	0.00371352785145889	0	0.013262599469496	0.00159151193633952	0	0.00212201591511936
48D44sem	0.00642398286937901	0.00856531049250535	0.0107066381156317	0.019271948608137	0.0599571734475375	0.00535331905781585	0.0107066381156317	0.00107066381156317	0.00107066381156317	0.00321199143468951	0	0.00428265524625268	0.0770877944325482	0.0171306209850107	0	0	0.00642398286937901	0.0139186295503212	0	0.00642398286937901	0.00107066381156317	0.00107066381156317	0.0214132762312634	0	0.0182012847965739	0	0	0.00535331905781585	0	0.00428265524625268	0	0	0.00107066381156317	0.00428265524625268	0.0107066381156317	0.0139186295503212	0	0	0	0	0.00214132762312634	0.00535331905781585	0.00642398286937901	0	0	0	0.00428265524625268	0	0.00963597430406852
48D54sem	0.00280112044817927	0.0065359477124183	0.00186741363211951	0.0532212885154062	0.0364145658263305	0.0149393090569561	0.0252100840336134	0.00186741363211951	0.00280112044817927	0.00373482726423903	0	0.00746965452847806	0.0821661998132586	0.00933706816059757	0	0.00373482726423903	0.0354808590102708	0.0261437908496732	0	0.000933706816059757	0.00186741363211951	0	0.0280112044817927	0.000933706816059757	0.00186741363211951	0.00280112044817927	0	0.000933706816059757	0.00186741363211951	0.00840336134453781	0	0	0.000933706816059757	0.000933706816059757	0	0.00466853408029879	0	0	0	0.00280112044817927	0.000933706816059757	0.00186741363211951	0.000933706816059757	0.000933706816059757	0	0.00280112044817927	0.00560224089635854	0.000933706816059757	0.00466853408029879
48D64sem	0.00221238938053097	0.00774336283185841	0	0.0221238938053097	0.0464601769911504	0	0.0121681415929204	0.00331858407079646	0	0.00442477876106195	0	0.00553097345132743	0.084070796460177	0.0221238938053097	0	0	0.00110619469026549	0.00995575221238938	0	0.00110619469026549	0.00110619469026549	0.00221238938053097	0.0199115044247788	0.00221238938053097	0.00331858407079646	0	0	0	0.00110619469026549	0.00553097345132743	0.00110619469026549	0	0.00221238938053097	0.00442477876106195	0.00221238938053097	0.00663716814159292	0	0	0.00110619469026549	0.00663716814159292	0.00110619469026549	0.00110619469026549	0.00221238938053097	0	0.00110619469026549	0.00553097345132743	0.00553097345132743	0.00110619469026549	0.0188053097345133
48D74sem	0.00513874614594039	0.0102774922918808	0.00102774922918808	0.0205549845837616	0.0462487153134635	0.00411099691675231	0.0092497430626927	0	0.00205549845837616	0.0092497430626927	0	0.00513874614594039	0.0966084275436793	0.0215827338129496	0.00205549845837616	0	0.00411099691675231	0.0339157245632066	0	0.00102774922918808	0.00205549845837616	0	0.0164439876670093	0	0.00205549845837616	0.00205549845837616	0.00205549845837616	0	0	0.00513874614594039	0	0	0.00102774922918808	0.00616649537512847	0.00411099691675231	0.00719424460431655	0.00205549845837616	0	0	0.00513874614594039	0.00205549845837616	0.00308324768756423	0.00616649537512847	0	0	0	0.00102774922918808	0	0.00513874614594039
714sem	0.00303951367781155	0.00911854103343465	0.00101317122593718	0.022289766970618	0.0618034447821682	0	0.0314083080040527	0.00101317122593718	0.00303951367781155	0.0172239108409321	0	0.0192502532928065	0.0911854103343465	0.00506585612968592	0	0.00202634245187437	0.00303951367781155	0.10435663627153	0	0.00506585612968592	0	0	0.0151975683890578	0	0.00303951367781155	0	0	0	0	0.00202634245187437	0	0	0.00101317122593718	0.00101317122593718	0.00709219858156028	0.00202634245187437	0	0	0	0	0	0	0.00405268490374873	0	0	0.00506585612968592	0.00405268490374873	0	0.00506585612968592
724sem	0.00333333333333333	0.00444444444444444	0.00444444444444444	0.00333333333333333	0.0311111111111111	0	0.0288888888888889	0	0	0.02	0.00222222222222222	0.02	0.106666666666667	0.00888888888888889	0	0.00111111111111111	0.00888888888888889	0.121111111111111	0	0.00222222222222222	0	0	0.02	0	0.00111111111111111	0.00111111111111111	0	0	0	0.00222222222222222	0	0.00111111111111111	0.00222222222222222	0.00555555555555556	0.00333333333333333	0.00777777777777778	0	0	0.00111111111111111	0	0.00444444444444444	0.00111111111111111	0.00888888888888889	0	0	0.00111111111111111	0.00111111111111111	0	0.00444444444444444
734sem	0.00550660792951542	0.00991189427312775	0.00440528634361234	0.0220264317180617	0.052863436123348	0.00110132158590308	0.00991189427312775	0.00220264317180617	0.00220264317180617	0.0143171806167401	0	0.0198237885462555	0.0704845814977974	0.0143171806167401	0.00220264317180617	0	0.00991189427312775	0.0947136563876652	0	0.00110132158590308	0	0	0.0110132158590308	0	0	0.00220264317180617	0	0.00110132158590308	0	0.00330396475770925	0	0	0.00110132158590308	0.00110132158590308	0.00440528634361234	0.0121145374449339	0	0	0	0	0	0.00110132158590308	0.00881057268722467	0	0	0.0066079295154185	0.00330396475770925	0	0.00110132158590308
744sem	0.00210304942166141	0.00420609884332282	0.00630914826498423	0.0441640378548896	0.106203995793901	0	0.0220820189274448	0	0.00420609884332282	0.0115667718191377	0.0010515247108307	0.0231335436382755	0.11882229232387	0.00630914826498423	0	0.00315457413249211	0.00525762355415352	0.112513144058885	0	0.00210304942166141	0.00210304942166141	0	0.010515247108307	0	0	0.010515247108307	0	0	0	0.00630914826498423	0.0010515247108307	0.0010515247108307	0.00210304942166141	0.00315457413249211	0.0115667718191377	0.010515247108307	0	0	0	0	0	0.00420609884332282	0.00841219768664564	0.00210304942166141	0	0.00315457413249211	0	0.0010515247108307	0.0010515247108307
754sem	0	0.00730816077953715	0.0365408038976857	0.0158343483556638	0.0669914738124239	0	0.0450669914738124	0.00243605359317905	0	0.0158343483556638	0.00365408038976857	0.0207064555420219	0.0730816077953715	0	0	0	0.0121802679658952	0.0596833130328867	0	0	0	0	0.00852618757612668	0	0	0.00609013398294762	0	0	0.00243605359317905	0.00121802679658952	0	0	0.00243605359317905	0.00243605359317905	0.00365408038976857	0.00365408038976857	0.00121802679658952	0	0.00121802679658952	0	0	0.00243605359317905	0.0097442143727162	0.00852618757612668	0	0.00121802679658952	0.00121802679658952	0	0.00365408038976857
764sem	0.000856164383561644	0.00428082191780822	0.0222602739726027	0.0402397260273973	0.0599315068493151	0	0.0333904109589041	0.000856164383561644	0.00256849315068493	0.0316780821917808	0.00342465753424658	0.0136986301369863	0.0479452054794521	0.00599315068493151	0	0	0.00599315068493151	0.0453767123287671	0	0.00256849315068493	0.000856164383561644	0.00171232876712329	0.0188356164383562	0.000856164383561644	0	0.00513698630136986	0.000856164383561644	0	0	0.00513698630136986	0.000856164383561644	0.00256849315068493	0.00171232876712329	0.000856164383561644	0.0102739726027397	0.00770547945205479	0	0	0.00171232876712329	0	0	0.00342465753424658	0.00513698630136986	0.000856164383561644	0.000856164383561644	0	0.00171232876712329	0	0.000856164383561644
774sem	0	0.00300751879699248	0	0.254887218045113	0.0571428571428571	0	0.0142857142857143	0	0	0.00977443609022556	0.00150375939849624	0.0157894736842105	0.075187969924812	0.00150375939849624	0	0	0.00526315789473684	0.0157894736842105	0	0.00150375939849624	0	0.00075187969924812	0.0383458646616541	0.00225563909774436	0	0.00300751879699248	0	0.00150375939849624	0.0413533834586466	0.00827067669172932	0.00075187969924812	0.00075187969924812	0.00601503759398496	0.00075187969924812	0.0263157894736842	0.00676691729323308	0	0	0	0	0.00451127819548872	0.00300751879699248	0.00451127819548872	0	0.00075187969924812	0.00075187969924812	0.00075187969924812	0.00075187969924812	0.00225563909774436
HB314sem	0.00248292985723153	0.0130353817504655	0.00186219739292365	0.0180012414649286	0.0409683426443203	0.0037243947858473	0.0248292985723153	0.00248292985723153	0.000620732464307883	0.0304158907510863	0.00186219739292365	0.0142768466790813	0.0502793296089385	0.00248292985723153	0	0.00248292985723153	0.00682805710738672	0.332712600869025	0	0	0.000620732464307883	0	0.0173805090006207	0	0	0.00310366232153942	0.00124146492861577	0	0.000620732464307883	0.0074487895716946	0	0.000620732464307883	0.000620732464307883	0.00434512725015518	0.0037243947858473	0.00434512725015518	0	0	0.00186219739292365	0.00124146492861577	0.00124146492861577	0.00186219739292365	0.00248292985723153	0	0	0.00620732464307883	0.00993171942892613	0.00124146492861577	0.0037243947858473
HB324sem	0	0.0237003058103976	0.00152905198776758	0.0290519877675841	0.0451070336391437	0	0.0626911314984709	0.000764525993883792	0.00152905198776758	0.0114678899082569	0.00229357798165138	0.0160550458715596	0.0581039755351682	0.000764525993883792	0	0	0.00458715596330275	0.198012232415902	0	0.00229357798165138	0.000764525993883792	0	0.0160550458715596	0.000764525993883792	0	0.00535168195718654	0	0	0	0.00535168195718654	0.000764525993883792	0	0.00152905198776758	0.00152905198776758	0.00688073394495413	0.00458715596330275	0.000764525993883792	0	0	0.00229357798165138	0	0.00688073394495413	0.00152905198776758	0	0.000764525993883792	0.0152905198776758	0.0137614678899083	0	0.00382262996941896
HB334sem	0.0190735694822888	0.0172570390554042	0.0372388737511353	0.0299727520435967	0.0608537693006358	0.00544959128065395	0.0299727520435967	0.00454132606721163	0.000908265213442325	0.00635785649409628	0.0036330608537693	0.00908265213442325	0.0926430517711172	0.00272479564032698	0.000908265213442325	0.00817438692098093	0.0108991825613079	0.133514986376022	0	0.00181653042688465	0.00272479564032698	0	0.0227066303360581	0	0	0.00272479564032698	0	0	0	0.00908265213442325	0	0	0.000908265213442325	0.00181653042688465	0.0108991825613079	0.00635785649409628	0	0	0.00272479564032698	0	0	0.00635785649409628	0	0	0	0.03905540417802	0.00454132606721163	0	0
HB344sem	0.0020979020979021	0.0013986013986014	0.0013986013986014	0.0125874125874126	0.0475524475524476	0.000699300699300699	0.0384615384615385	0	0.0013986013986014	0.034965034965035	0.0013986013986014	0.00629370629370629	0.0475524475524476	0.0013986013986014	0.000699300699300699	0	0.0041958041958042	0.383216783216783	0	0	0.0020979020979021	0	0.0356643356643357	0.000699300699300699	0	0.0034965034965035	0	0	0.0013986013986014	0.00629370629370629	0.0013986013986014	0.000699300699300699	0	0	0.0027972027972028	0.0048951048951049	0	0	0	0.000699300699300699	0	0.0041958041958042	0.0048951048951049	0	0.000699300699300699	0.0104895104895105	0.00839160839160839	0	0
HB354sem	0.00145772594752187	0.010932944606414	0.0021865889212828	0.00364431486880466	0.0291545189504373	0	0.0422740524781341	0.00145772594752187	0	0.0276967930029155	0	0.00510204081632653	0.0626822157434402	0.000728862973760933	0.000728862973760933	0	0.0415451895043732	0.39868804664723	0	0	0.000728862973760933	0	0.0182215743440233	0	0	0.0021865889212828	0	0.00145772594752187	0	0.00947521865889213	0	0	0	0.00145772594752187	0.0043731778425656	0.00364431486880466	0.000728862973760933	0	0	0	0	0.00364431486880466	0.0043731778425656	0.00145772594752187	0	0.00291545189504373	0.0043731778425656	0	0.0021865889212828
HB364sem	0.00237906423473434	0.00555114988104679	0	0.0190325138778747	0.0340999206978588	0.00158604282315623	0.0475812846946868	0	0	0.0277557494052339	0.00158604282315623	0.014274385408406	0.0507533703409992	0.00317208564631245	0	0.00237906423473434	0.0594766058683584	0.321173671689136	0	0	0.000793021411578113	0.000793021411578113	0.0317208564631245	0	0	0.00317208564631245	0	0	0	0.00793021411578113	0	0	0	0.00317208564631245	0.00396510705789056	0.0103092783505155	0	0	0	0	0	0.00158604282315623	0.000793021411578113	0.000793021411578113	0.000793021411578113	0.000793021411578113	0.000793021411578113	0.00158604282315623	0.00158604282315623
HB374sem	0.000643500643500643	0.00144787644787645	0.000965250965250965	0.00209137709137709	0.0114221364221364	0.000482625482625483	0.740669240669241	0	0.000321750321750322	0.00772200772200772	0.000643500643500643	0.00386100386100386	0.0122265122265122	0.000482625482625483	0.000321750321750322	0.000643500643500643	0.0204311454311454	0.0915379665379665	0	0.000160875160875161	0.000643500643500643	0	0.00209137709137709	0.000160875160875161	0	0.000160875160875161	0.000321750321750322	0.000160875160875161	0.000160875160875161	0.00112612612612613	0	0	0	0.000643500643500643	0.00241312741312741	0.000804375804375804	0	0	0	0.000643500643500643	0.000482625482625483	0	0.000643500643500643	0.000482625482625483	0.000160875160875161	0.000160875160875161	0.000804375804375804	0	0.000965250965250965
LAND114sem	0.00464037122969838	0.0208816705336427	0.00541376643464811	0.0232018561484919	0.0618716163959783	0.0185614849187935	0.0208816705336427	0.00154679040989946	0.00309358081979892	0.0255220417633411	0.00618716163959783	0.0177880897138438	0.0363495746326373	0.0108275328692962	0.00154679040989946	0.00154679040989946	0.0108275328692962	0.0440835266821346	0	0	0.00928074245939675	0.00154679040989946	0.0224284609435422	0	0	0.0262954369682908	0	0	0	0.00928074245939675	0	0	0	0.000773395204949729	0.00232018561484919	0.00232018561484919	0	0	0.0317092034029389	0.00309358081979892	0	0.00309358081979892	0.00386697602474865	0.00232018561484919	0	0.00618716163959783	0.00154679040989946	0	0.00618716163959783
LAND124sem	0.00216763005780347	0.00939306358381503	0.00578034682080925	0.0744219653179191	0.0534682080924856	0.0065028901734104	0.036849710982659	0.000722543352601156	0.00578034682080925	0.0375722543352601	0.00144508670520231	0.0195086705202312	0.065028901734104	0.0245664739884393	0.000722543352601156	0.00289017341040462	0.0101156069364162	0.0534682080924856	0	0	0.00361271676300578	0.000722543352601156	0.0238439306358381	0.00144508670520231	0.00144508670520231	0	0	0	0	0.0101156069364162	0.00216763005780347	0	0.00144508670520231	0.00289017341040462	0.00578034682080925	0.0122832369942197	0	0	0.000722543352601156	0.00289017341040462	0.000722543352601156	0.00144508670520231	0.00505780346820809	0.000722543352601156	0	0.0130057803468208	0.0216763005780347	0	0.0144508670520231
LAND134sem	0.00527240773286467	0.00966608084358524	0.000878734622144112	0.0263620386643234	0.0395430579964851	0.00966608084358524	0.0342706502636204	0.00175746924428822	0.00527240773286467	0.0333919156414763	0	0.015817223198594	0.046572934973638	0.0333919156414763	0.00175746924428822	0.000878734622144112	0.00439367311072056	0.0641476274165202	0	0	0.00878734622144113	0.000878734622144112	0.0228471001757469	0.00175746924428822	0.000878734622144112	0	0	0	0.00175746924428822	0.0105448154657293	0	0	0	0.000878734622144112	0.00439367311072056	0.00439367311072056	0	0	0	0.0070298769771529	0	0	0.00351493848857645	0.000878734622144112	0	0.00790861159929701	0.00263620386643234	0	0.0114235500878735
LAND144sem	0.00343938091143594	0.0137575236457438	0.00515907136715391	0.0756663800515907	0.0679277730008599	0.00515907136715391	0.0412725709372313	0.00257953568357696	0.00343938091143594	0.0275150472914875	0.00171969045571797	0.0232158211521926	0.0954428202923474	0.0180567497850387	0.00257953568357696	0	0.00945829750644884	0.0541702493551161	0	0	0.00343938091143594	0.000859845227858985	0.00773860705073087	0.000859845227858985	0	0	0	0	0.00343938091143594	0.0154772141014617	0.00171969045571797	0	0.00171969045571797	0.000859845227858985	0.0163370593293207	0.0111779879621668	0	0	0	0.00257953568357696	0.000859845227858985	0.000859845227858985	0.000859845227858985	0	0.000859845227858985	0.00945829750644884	0.0189165950128977	0	0.00171969045571797
LAND154sem	0.00627352572145546	0.0263488080301129	0.0100376411543287	0.0865746549560853	0.0351317440401506	0.013801756587202	0.0301129234629862	0.00376411543287327	0.00501882057716437	0.0263488080301129	0.00501882057716437	0.0125470514429109	0.0501882057716437	0.0163111668757842	0.00250941028858218	0	0.0225846925972397	0.0577164366373902	0	0.00125470514429109	0.00501882057716437	0	0.00250941028858218	0	0.00125470514429109	0	0.00125470514429109	0	0	0.0150564617314931	0.00125470514429109	0.00125470514429109	0.00250941028858218	0	0	0.0112923462986198	0	0	0	0.00627352572145546	0	0	0.00627352572145546	0.00501882057716437	0	0.00878293601003764	0.027603513174404	0	0
LAND164sem	0.00329760923330585	0.00741962077493817	0.00164880461665293	0.023083264633141	0.0329760923330585	0	0.0511129431162407	0	0.00577081615828524	0.0263808738664468	0	0.0140148392415499	0.0684253915910965	0.0173124484748557	0	0.00329760923330585	0.00577081615828524	0.0527617477328937	0	0	0.000824402308326463	0.00247320692497939	0.0313272877164056	0.000824402308326463	0	0.00164880461665293	0	0.000824402308326463	0	0.0148392415498763	0	0	0.000824402308326463	0.00494641384995878	0.000824402308326463	0.0156636438582028	0.00164880461665293	0	0	0	0.00164880461665293	0.00247320692497939	0.00412201154163232	0	0.000824402308326463	0.00494641384995878	0.00577081615828524	0.000824402308326463	0.010717230008244
LAND414sem	0.00857142857142857	0.00714285714285714	0.00571428571428571	0.0564285714285714	0.0328571428571429	0.000714285714285714	0.0935714285714286	0.000714285714285714	0.00142857142857143	0.0107142857142857	0.005	0.0207142857142857	0.0464285714285714	0.0114285714285714	0	0.00571428571428571	0.0192857142857143	0.0385714285714286	0	0	0.005	0.000714285714285714	0.0185714285714286	0.00142857142857143	0.00142857142857143	0	0	0.000714285714285714	0.00285714285714286	0.00571428571428571	0	0	0	0	0.000714285714285714	0.0107142857142857	0	0	0.000714285714285714	0.000714285714285714	0	0	0.00214285714285714	0.00357142857142857	0	0.00928571428571429	0.00214285714285714	0	0.00571428571428571
LAND424sem	0.00267379679144385	0.0071301247771836	0.0089126559714795	0.0704099821746881	0.0294117647058824	0.0017825311942959	0.0258467023172906	0.00089126559714795	0.00267379679144385	0.00445632798573975	0	0.00445632798573975	0.0597147950089127	0.0133689839572193	0	0.00089126559714795	0.0089126559714795	0.0231729055258467	0	0	0.0035650623885918	0	0.00802139037433155	0.00089126559714795	0	0.00089126559714795	0	0	0.0017825311942959	0.0142602495543672	0	0	0.00089126559714795	0.0071301247771836	0.00267379679144385	0.0071301247771836	0	0	0	0.0035650623885918	0	0.0017825311942959	0.00445632798573975	0	0	0.0106951871657754	0.00445632798573975	0	0.0071301247771836
LAND434sem	0.0292333149476007	0.00772200772200772	0.0733590733590734	0.0341974627688913	0.0248207391064534	0.00551571980143409	0.0215113072255929	0.00220628792057364	0.00165471594043023	0.00330943188086045	0.00110314396028682	0.00772200772200772	0.099834528405957	0.0137892995035852	0	0.000551571980143409	0.00882515168229454	0.0193050193050193	0	0	0.00165471594043023	0.00275785990071704	0.0297848869277441	0.00110314396028682	0	0.00165471594043023	0.00220628792057364	0.00330943188086045	0.00110314396028682	0.0137892995035852	0	0	0.00110314396028682	0.00772200772200772	0.00275785990071704	0.0066188637617209	0	0	0	0.00275785990071704	0.00110314396028682	0.000551571980143409	0.00496414782129068	0.00165471594043023	0.000551571980143409	0.0137892995035852	0.00165471594043023	0	0.00992829564258136
LAND444sem	0.0106382978723404	0.016366612111293	0.0196399345335516	0.0360065466448445	0.0360065466448445	0.00900163666121113	0.030278232405892	0	0.00327332242225859	0.00409165302782324	0.00409165302782324	0.0106382978723404	0.0531914893617021	0.0253682487725041	0.00245499181669394	0	0.0114566284779051	0.0319148936170213	0	0	0.00327332242225859	0.00327332242225859	0.0130932896890344	0	0.000818330605564648	0.00245499181669394	0.00245499181669394	0.000818330605564648	0	0.00981996726677578	0	0	0.000818330605564648	0.00327332242225859	0.00327332242225859	0.00327332242225859	0.000818330605564648	0	0	0.000818330605564648	0	0	0.000818330605564648	0.000818330605564648	0	0.00818330605564648	0.00327332242225859	0	0.0147299509001637
LAND454sem	0.00925925925925926	0.00752314814814815	0.0173611111111111	0.0324074074074074	0.0347222222222222	0.00462962962962963	0.0653935185185185	0	0.00347222222222222	0.0115740740740741	0	0.0138888888888889	0.0578703703703704	0.0237268518518519	0.000578703703703704	0.000578703703703704	0.0190972222222222	0.052662037037037	0.00173611111111111	0	0.00462962962962963	0.000578703703703704	0.0104166666666667	0.000578703703703704	0.00173611111111111	0.000578703703703704	0.000578703703703704	0	0.00405092592592593	0.00868055555555556	0.000578703703703704	0	0.00115740740740741	0.00231481481481481	0.000578703703703704	0.00347222222222222	0	0	0.000578703703703704	0.00115740740740741	0.00115740740740741	0.00289351851851852	0.000578703703703704	0.00231481481481481	0.000578703703703704	0.0202546296296296	0.000578703703703704	0.00289351851851852	0.00868055555555556
LAND464sem	0.0126329787234043	0.0106382978723404	0.0359042553191489	0.0711436170212766	0.0392287234042553	0.00930851063829787	0.0345744680851064	0.000664893617021277	0.00465425531914894	0.0106382978723404	0.00398936170212766	0.00997340425531915	0.0578457446808511	0.011968085106383	0.00265957446808511	0.000664893617021277	0.00997340425531915	0.0252659574468085	0	0	0.00598404255319149	0.00398936170212766	0.0206117021276596	0.000664893617021277	0.00199468085106383	0.000664893617021277	0	0	0.00132978723404255	0.0106382978723404	0.000664893617021277	0.000664893617021277	0.00398936170212766	0	0.00199468085106383	0.00664893617021277	0	0	0	0	0.00199468085106383	0.00265957446808511	0.00531914893617021	0.00132978723404255	0	0.0139627659574468	0.000664893617021277	0	0.00797872340425532
LI114sem	0.00258064516129032	0.00967741935483871	0.0032258064516129	0.0348387096774194	0.0812903225806452	0.00258064516129032	0.012258064516129	0.0032258064516129	0.0032258064516129	0.0032258064516129	0	0.00516129032258065	0.0774193548387097	0.0135483870967742	0.000645161290322581	0.00193548387096774	0.00580645161290323	0.0103225806451613	0	0	0	0.00258064516129032	0.0367741935483871	0.00193548387096774	0	0.00258064516129032	0.00516129032258065	0.00129032258064516	0.00451612903225806	0.0032258064516129	0	0	0.00193548387096774	0.00193548387096774	0.00451612903225806	0.00967741935483871	0	0	0.00129032258064516	0.00129032258064516	0	0.00451612903225806	0.00258064516129032	0	0.00129032258064516	0.00580645161290323	0.0032258064516129	0	0.00903225806451613
LI124sem	0.00688073394495413	0.00535168195718654	0.00305810397553517	0.0917431192660551	0.10474006116208	0.00382262996941896	0.00917431192660551	0	0.00152905198776758	0.00382262996941896	0	0.00688073394495413	0.0603975535168196	0.00764525993883792	0	0	0.00152905198776758	0.00382262996941896	0	0	0.000764525993883792	0.000764525993883792	0.0267584097859327	0	0.00458715596330275	0.00305810397553517	0.000764525993883792	0.00152905198776758	0.00458715596330275	0.00535168195718654	0	0.00229357798165138	0.000764525993883792	0.00458715596330275	0.00382262996941896	0.00764525993883792	0	0	0.00840978593272171	0	0	0.00458715596330275	0.00917431192660551	0	0	0.00611620795107034	0.00305810397553517	0.00152905198776758	0.0175840978593272
LI134sem	0.0312273057371097	0.0145243282498184	0.00580973129992738	0.074800290486565	0.103848946986202	0.00145243282498184	0.00944081336238199	0.00435729847494553	0.000726216412490922	0.00726216412490922	0	0.00798838053740015	0.0682643427741467	0.0203340595497458	0	0.00145243282498184	0.00508351488743646	0.00798838053740015	0	0	0.00217864923747277	0	0.027596223674655	0.000726216412490922	0.00363108206245461	0.000726216412490922	0.000726216412490922	0	0.00580973129992738	0.00363108206245461	0.000726216412490922	0	0	0.00363108206245461	0.00217864923747277	0.00580973129992738	0	0	0.00290486564996369	0.000726216412490922	0.00435729847494553	0.00217864923747277	0.00435729847494553	0.000726216412490922	0	0.00580973129992738	0.00217864923747277	0	0.0108932461873638
LI144sem	0.00524109014675052	0.00524109014675052	0.0136268343815514	0.059748427672956	0.0786163522012579	0	0.00524109014675052	0.0010482180293501	0	0.00419287211740042	0	0.00314465408805031	0.0670859538784067	0.010482180293501	0	0.00209643605870021	0.00314465408805031	0.0010482180293501	0	0.00209643605870021	0	0	0.090146750524109	0.00209643605870021	0.0010482180293501	0.00209643605870021	0	0	0	0.00838574423480084	0	0.00209643605870021	0.00314465408805031	0.00524109014675052	0.00314465408805031	0.00733752620545073	0	0	0.00314465408805031	0	0	0.00838574423480084	0.0010482180293501	0.00524109014675052	0	0.00209643605870021	0.0010482180293501	0	0.00733752620545073
LI154sem	0.000677048070412999	0.00880162491536899	0.004739336492891	0.049424509140149	0.0501015572105619	0.001354096140826	0.00609343263371699	0.001354096140826	0	0.002031144211239	0	0.00880162491536899	0.0582261340555179	0.00677048070412999	0	0.000677048070412999	0.002708192281652	0.00541638456330399	0	0	0	0	0.383886255924171	0.000677048070412999	0	0.001354096140826	0	0.002708192281652	0.002708192281652	0.00541638456330399	0.001354096140826	0	0	0.002708192281652	0.002708192281652	0.004739336492891	0	0	0.00880162491536899	0	0	0.001354096140826	0.012186865267434	0	0	0.001354096140826	0.000677048070412999	0.002031144211239	0.004062288422478
LI164sem	0.0040394973070018	0.00224416517055655	0.00179533213644524	0.0148114901256732	0.0489228007181329	0.00134649910233393	0.437163375224417	0.00134649910233393	0.000897666068222621	0.00179533213644524	0	0.00314183123877917	0.0516157989228007	0.0157091561938959	0.000448833034111311	0.000448833034111311	0.000448833034111311	0.00763016157989228	0	0	0.000448833034111311	0.000448833034111311	0.018850987432675	0.00314183123877917	0	0.00134649910233393	0	0.00179533213644524	0.0040394973070018	0.000897666068222621	0	0.000897666068222621	0.000448833034111311	0.0040394973070018	0.00807899461400359	0.00448833034111311	0	0	0.000897666068222621	0.000448833034111311	0.000448833034111311	0.000897666068222621	0.0040394973070018	0	0	0.00134649910233393	0.00179533213644524	0.00134649910233393	0.0040394973070018
LI174sem	0.00262368815592204	0.00562218890554723	0.000749625187406297	0.0239880059970015	0.0389805097451274	0.00224887556221889	0.489505247376312	0.000374812593703148	0.00374812593703148	0.000374812593703148	0	0.00299850074962519	0.027736131934033	0.00749625187406297	0.00112443778110945	0.000374812593703148	0.00112443778110945	0.00487256371814093	0	0	0.000749625187406297	0	0.157046476761619	0.000374812593703148	0.000374812593703148	0.00112443778110945	0	0	0.00149925037481259	0.00224887556221889	0.000374812593703148	0	0	0.00149925037481259	0.00224887556221889	0.00262368815592204	0	0	0	0	0	0.00224887556221889	0.00187406296851574	0.000374812593703148	0	0.00187406296851574	0.00637181409295352	0.000374812593703148	0.00149925037481259
LI214sem	0.0111856823266219	0.011744966442953	0.00447427293064877	0.0805369127516778	0.0822147651006711	0.00727069351230425	0.0486577181208054	0	0.000559284116331096	0.0229306487695749	0	0.0296420581655481	0.0693512304250559	0.04082774049217	0.000559284116331096	0	0.0162192393736018	0.0201342281879195	0.000559284116331096	0.00167785234899329	0.00223713646532438	0.00223713646532438	0.00559284116331096	0	0.00167785234899329	0.00167785234899329	0	0.00223713646532438	0.011744966442953	0.00950782997762863	0.00111856823266219	0	0.00279642058165548	0.00391498881431767	0.00503355704697987	0.00111856823266219	0	0	0.000559284116331096	0.00111856823266219	0	0.000559284116331096	0.00559284116331096	0	0.000559284116331096	0.0128635346756152	0.00111856823266219	0	0.00279642058165548
LI224sem	0.0164439876670093	0.0298047276464543	0.00616649537512847	0.02672147995889	0.13360739979445	0.0143884892086331	0.013360739979445	0.00102774922918808	0.00308324768756423	0.0113052415210689	0	0.00822199383350463	0.0606372045220966	0.0195272353545735	0.00102774922918808	0	0.0123329907502569	0.00616649537512847	0	0	0.00102774922918808	0	0.00411099691675231	0.00102774922918808	0.0092497430626927	0	0	0	0.00822199383350463	0.00719424460431655	0.00205549845837616	0.00102774922918808	0.00308324768756423	0.00719424460431655	0.00616649537512847	0.00308324768756423	0.00102774922918808	0	0.00616649537512847	0	0	0.00205549845837616	0.00411099691675231	0.00102774922918808	0	0.00411099691675231	0.00513874614594039	0	0.00411099691675231
LI234sem	0.0240601503759399	0.0180451127819549	0.00827067669172932	0.0353383458646617	0.12406015037594	0.0105263157894737	0.00225563909774436	0.00075187969924812	0	0.0150375939849624	0	0.0037593984962406	0.118796992481203	0.0172932330827068	0	0	0.00526315789473684	0.00451127819548872	0	0	0	0.00150375939849624	0.00827067669172932	0.00300751879699248	0.0037593984962406	0	0	0	0.0120300751879699	0.0112781954887218	0.00075187969924812	0	0.00225563909774436	0.00150375939849624	0	0.00451127819548872	0	0	0.00676691729323308	0	0	0.00225563909774436	0.00225563909774436	0	0.00075187969924812	0.0120300751879699	0.00150375939849624	0.00075187969924812	0.00075187969924812
LI244sem	0.01125	0.01875	0.00375	0.02	0.065	0.00625	0.00375	0	0.005	0.02625	0	0.015	0.07875	0.01625	0	0	0.00625	0.00125	0	0.00125	0.00375	0	0.0075	0	0.0025	0.0025	0.0025	0	0.0075	0.0075	0.00125	0	0.00625	0.005	0.0025	0.0125	0	0	0	0	0	0.0025	0.0125	0	0	0.00625	0.00125	0	0.00375
LI254sem	0.0124707716289945	0.0140296180826189	0.00467653936087295	0.0155884645362432	0.06858924395947	0.00311769290724864	0.000779423226812159	0.000779423226812159	0.00155884645362432	0.00233826968043648	0	0.00233826968043648	0.0779423226812159	0.0132501948558067	0.00155884645362432	0.00311769290724864	0.0530007794232268	0	0	0	0.00155884645362432	0	0.029618082618862	0.00233826968043648	0.00155884645362432	0.00233826968043648	0	0.00233826968043648	0.000779423226812159	0.0140296180826189	0	0.000779423226812159	0.00545596258768511	0.000779423226812159	0.00545596258768511	0.014809041309431	0	0	0.00389711613406079	0.000779423226812159	0.000779423226812159	0.00935307872174591	0.00545596258768511	0.00155884645362432	0.00233826968043648	0.00155884645362432	0.000779423226812159	0	0.014809041309431
LI264sem	0.00611888111888112	0.0131118881118881	0.00174825174825175	0.0358391608391608	0.0812937062937063	0.0166083916083916	0.00174825174825175	0.00174825174825175	0	0.013986013986014	0	0.00174825174825175	0.0909090909090909	0.0104895104895105	0.000874125874125874	0.00174825174825175	0.00174825174825175	0	0	0	0.000874125874125874	0.00262237762237762	0.0340909090909091	0	0.000874125874125874	0.00262237762237762	0.000874125874125874	0.000874125874125874	0	0.0201048951048951	0	0	0.00611888111888112	0.00262237762237762	0.00524475524475524	0.0113636363636364	0	0	0.00437062937062937	0.000874125874125874	0.00262237762237762	0.00611888111888112	0.0148601398601399	0.000874125874125874	0	0.000874125874125874	0.00437062937062937	0	0.0113636363636364
LI274sem	0.00921942224953903	0.0221266133988937	0.00430239704978488	0.0614628149969269	0.0676090964966195	0.0202827289489859	0	0.000614628149969269	0.00307314074984634	0.00430239704978488	0	0.00430239704978488	0.101413644744929	0.0129071911493546	0.000614628149969269	0	0.0350338045482483	0	0	0	0.00122925629993854	0.00122925629993854	0.0374923171481254	0.00122925629993854	0	0.00245851259987707	0.000614628149969269	0	0.00122925629993854	0.0153657037492317	0.000614628149969269	0	0.000614628149969269	0.000614628149969269	0.00368776889981561	0.00430239704978488	0	0	0	0	0.00184388444990781	0.00430239704978488	0.00368776889981561	0	0.00122925629993854	0.00430239704978488	0.000614628149969269	0.00122925629993854	0.0147510755992624
M2214sem	0.00389483933787731	0.0107108081791626	0.00292112950340798	0.0146056475170399	0.068159688412853	0.0136319376825706	0.0379746835443038	0	0.00292112950340798	0.00486854917234664	0.00486854917234664	0.0116845180136319	0.0642648490749757	0.0185004868549172	0	0	0.0194741966893866	0.0457643622200584	0	0	0.0068159688412853	0	0.00876338851022395	0.00194741966893866	0	0	0	0	0	0.000973709834469328	0	0.000973709834469328	0	0.000973709834469328	0.00292112950340798	0.0068159688412853	0	0	0.000973709834469328	0.000973709834469328	0	0	0	0	0	0.00194741966893866	0.000973709834469328	0	0.00194741966893866
M2224sem	0	0.011943539630836	0.00542888165038002	0.0206297502714441	0.0510314875135722	0.0249728555917481	0.0466883821932682	0.00325732899022801	0.00217155266015201	0.0130293159609121	0.001085776330076	0.0238870792616721	0.0836047774158523	0.00977198697068404	0.001085776330076	0.001085776330076	0.0249728555917481	0.0488599348534202	0	0	0.00977198697068404	0	0.011943539630836	0	0.001085776330076	0	0.00217155266015201	0	0	0.00434310532030402	0	0	0	0.001085776330076	0	0.00217155266015201	0.001085776330076	0	0.001085776330076	0.001085776330076	0	0	0.00325732899022801	0	0	0.00542888165038002	0.00434310532030402	0	0.00868621064060804
M2234sem	0.0148331273176761	0.0123609394313968	0.00370828182941904	0.0160692212608158	0.065512978986403	0.00988875154511743	0.0778739184177998	0.00123609394313968	0.00618046971569839	0.0296662546353523	0	0.00494437577255871	0.0593325092707046	0.0271940667490729	0.00247218788627936	0.00247218788627936	0.030902348578492	0.0568603213844252	0.00370828182941904	0.00123609394313968	0.00247218788627936	0	0.0123609394313968	0	0	0	0	0	0.00123609394313968	0.00741656365883807	0.00123609394313968	0	0.00618046971569839	0.00370828182941904	0.0185414091470952	0.00494437577255871	0	0	0	0.00123609394313968	0	0	0.00123609394313968	0.00370828182941904	0	0.00741656365883807	0.00370828182941904	0	0
M2244sem	0.00277264325323475	0.011090573012939	0.00277264325323475	0.0231053604436229	0.0609981515711645	0.00924214417744917	0.0397412199630314	0.00369685767097967	0.00369685767097967	0.0147874306839187	0.000924214417744917	0.00924214417744917	0.0794824399260629	0.0674676524953789	0.000924214417744917	0	0.0277264325323475	0.0434380776340111	0	0	0.000924214417744917	0.000924214417744917	0.0120147874306839	0.000924214417744917	0.00277264325323475	0.000924214417744917	0	0	0	0.00462107208872458	0	0	0.00184842883548983	0.00369685767097967	0.00184842883548983	0.00924214417744917	0	0	0.00646950092421442	0.000924214417744917	0	0.0212569316081331	0.00277264325323475	0.000924214417744917	0	0.00831792975970425	0.00277264325323475	0	0.00646950092421442
M2254sem	0.00321543408360129	0.00321543408360129	0.00643086816720257	0.045016077170418	0.0691318327974277	0.00482315112540193	0.0707395498392283	0	0	0.0160771704180064	0.00964630225080386	0.0305466237942122	0.0594855305466238	0.0176848874598071	0	0	0.0192926045016077	0.0659163987138264	0	0	0.00482315112540193	0.00160771704180064	0.00803858520900321	0	0	0.00160771704180064	0	0	0	0.00643086816720257	0	0	0.00160771704180064	0.00643086816720257	0	0.00482315112540193	0	0	0	0	0	0.00482315112540193	0	0	0	0.00964630225080386	0.00321543408360129	0	0.00160771704180064
M2264sem	0.00311850311850312	0.0176715176715177	0.00623700623700624	0.0311850311850312	0.0571725571725572	0.00727650727650728	0.0582120582120582	0	0.00103950103950104	0.0124740124740125	0.00415800415800416	0.0311850311850312	0.0426195426195426	0.0218295218295218	0	0.00103950103950104	0.0114345114345114	0.0467775467775468	0.00103950103950104	0	0	0	0.025987525987526	0.00415800415800416	0	0.00207900207900208	0	0.00727650727650728	0	0.00727650727650728	0	0.00103950103950104	0.00103950103950104	0.00207900207900208	0.0051975051975052	0.0114345114345114	0.00103950103950104	0	0.00207900207900208	0	0.00207900207900208	0	0.00207900207900208	0.00103950103950104	0	0.00727650727650728	0	0	0.00207900207900208
M2274sem	0.00834492350486787	0.00695410292072323	0.00278164116828929	0.0278164116828929	0.0639777468706537	0.0152990264255911	0.0458970792767733	0.00139082058414465	0.00139082058414465	0.0250347705146036	0.00139082058414465	0.0111265646731572	0.0723226703755216	0.0292072322670376	0.00139082058414465	0.00139082058414465	0.0125173852573018	0.0598052851182197	0.00139082058414465	0	0.00278164116828929	0.00278164116828929	0.0125173852573018	0	0	0.00139082058414465	0	0	0	0.00556328233657858	0	0	0	0.00139082058414465	0.00695410292072323	0.0111265646731572	0	0	0	0	0.00139082058414465	0	0.00417246175243394	0	0	0.00139082058414465	0.00139082058414465	0.00139082058414465	0.00417246175243394
M714sem	0.00399201596806387	0.00499001996007984	0.0129740518962076	0.0339321357285429	0.104790419161677	0.00698602794411178	0.0169660678642715	0	0.000998003992015968	0.0159680638722555	0.00199600798403194	0.00798403193612774	0.0548902195608782	0.031936127744511	0.0029940119760479	0.000998003992015968	0.0129740518962076	0.0199600798403194	0	0	0.000998003992015968	0.0029940119760479	0.0399201596806387	0	0	0	0	0.000998003992015968	0.0029940119760479	0.00898203592814371	0	0.00199600798403194	0	0.00199600798403194	0.00199600798403194	0.00798403193612774	0	0	0	0	0	0.00598802395209581	0.0109780439121756	0.00199600798403194	0.000998003992015968	0.00698602794411178	0.0029940119760479	0	0.00399201596806387
M724sem	0.00393700787401575	0.0078740157480315	0.005249343832021	0.0446194225721785	0.0616797900262467	0.0131233595800525	0.0118110236220472	0.0026246719160105	0.0078740157480315	0.0118110236220472	0	0.00918635170603675	0.124671916010499	0.0144356955380577	0	0	0.010498687664042	0.0196850393700787	0.00131233595800525	0	0.00131233595800525	0.005249343832021	0.0249343832020997	0.005249343832021	0	0	0	0.0026246719160105	0	0.010498687664042	0	0.00131233595800525	0.00131233595800525	0.00131233595800525	0	0.005249343832021	0.0131233595800525	0	0	0	0.0026246719160105	0.0026246719160105	0.00918635170603675	0	0	0.0026246719160105	0	0	0.00393700787401575
M734sem	0.00374531835205993	0.0187265917602996	0.0131086142322097	0.102059925093633	0.0767790262172285	0.00749063670411985	0.0393258426966292	0.00280898876404494	0.000936329588014981	0.00842696629213483	0	0.0140449438202247	0.0814606741573034	0.0430711610486891	0.000936329588014981	0.00280898876404494	0.0102996254681648	0.0102996254681648	0	0	0.00187265917602996	0.000936329588014981	0.0112359550561798	0.000936329588014981	0.000936329588014981	0.00374531835205993	0	0	0	0.00374531835205993	0.000936329588014981	0	0	0.000936329588014981	0.00187265917602996	0.00468164794007491	0	0	0.00374531835205993	0	0.00187265917602996	0.00280898876404494	0.00187265917602996	0	0	0.0177902621722846	0	0	0.00374531835205993
M744sem	0.00147058823529412	0.00294117647058824	0.00735294117647059	0.0455882352941176	0.0514705882352941	0.00147058823529412	0.0308823529411765	0.00294117647058824	0.00294117647058824	0	0.00147058823529412	0.00294117647058824	0.0838235294117647	0.0220588235294118	0	0.00588235294117647	0.00735294117647059	0.0132352941176471	0	0	0	0.00441176470588235	0.0235294117647059	0.00441176470588235	0.00294117647058824	0	0	0	0	0.00735294117647059	0	0	0	0.00147058823529412	0.00147058823529412	0.00588235294117647	0	0	0	0	0.00441176470588235	0.00735294117647059	0.00882352941176471	0.00294117647058824	0	0.00735294117647059	0	0	0.00147058823529412
M754sem	0.00433839479392625	0.00759219088937093	0.00650759219088937	0.0379609544468547	0.0542299349240781	0.00108459869848156	0.0184381778741865	0	0.00216919739696312	0.00976138828633406	0	0.0140997830802603	0.0759219088937093	0.00867678958785249	0.00108459869848156	0.00108459869848156	0.0119305856832972	0.0140997830802603	0	0.00108459869848156	0.00108459869848156	0.00433839479392625	0.0704989154013015	0.00325379609544469	0.00216919739696312	0.00759219088937093	0.00216919739696312	0	0	0.0119305856832972	0	0	0.00759219088937093	0.00108459869848156	0.00433839479392625	0.00325379609544469	0	0	0.00108459869848156	0	0	0.00325379609544469	0.00216919739696312	0	0	0.00216919739696312	0	0	0.00867678958785249
M764sem	0.00833333333333333	0.00416666666666667	0.00729166666666667	0.034375	0.0572916666666667	0.00625	0.0177083333333333	0.00208333333333333	0.00208333333333333	0.0125	0.0104166666666667	0.00833333333333333	0.115625	0.021875	0.00104166666666667	0.00104166666666667	0.0270833333333333	0.0125	0	0	0.00104166666666667	0.00416666666666667	0.05625	0	0	0.00104166666666667	0.00208333333333333	0	0.003125	0.00729166666666667	0.00104166666666667	0.00104166666666667	0	0.00104166666666667	0.00208333333333333	0.009375	0	0.00104166666666667	0.00104166666666667	0	0	0.00104166666666667	0.00104166666666667	0	0	0.00416666666666667	0	0.00104166666666667	0.0197916666666667
M774sem	0.00530152418820411	0.0046388336646786	0.00132538104705103	0.0145791915175613	0.0576540755467197	0.00596421471172962	0.0106030483764082	0	0.00265076209410205	0.00728959575878065	0.00132538104705103	0.00728959575878065	0.0609675281643473	0.00596421471172962	0	0	0.00530152418820411	0.0139165009940358	0	0	0.00198807157057654	0.379058979456594	0.025844930417495	0.00132538104705103	0	0.000662690523525514	0	0.00132538104705103	0	0.0139165009940358	0	0	0.000662690523525514	0.000662690523525514	0.00331345261762757	0.00795228628230616	0	0	0	0	0	0.00331345261762757	0.00265076209410205	0	0.00132538104705103	0.00596421471172962	0.000662690523525514	0.00265076209410205	0.00861497680583168
M814sem	0.0114942528735632	0.00804597701149425	0.00229885057471264	0.0528735632183908	0.0804597701149425	0.0137931034482759	0.0137931034482759	0.00229885057471264	0.00344827586206897	0.0275862068965517	0.00114942528735632	0.0114942528735632	0.0885057471264368	0.0172413793103448	0	0	0.00804597701149425	0.0149425287356322	0	0	0	0.00229885057471264	0.0114942528735632	0	0.00459770114942529	0	0.00229885057471264	0	0	0.0114942528735632	0.00114942528735632	0	0.00344827586206897	0.00459770114942529	0.00229885057471264	0.00804597701149425	0	0	0	0.00114942528735632	0.00344827586206897	0.00114942528735632	0.00344827586206897	0.00229885057471264	0	0.00459770114942529	0.00114942528735632	0	0.0126436781609195
M824sem	0.00285306704707561	0.00998573466476462	0.00713266761768902	0.072753209700428	0.0513552068473609	0.00855920114122682	0.0185449358059914	0.0014265335235378	0.00285306704707561	0.0256776034236805	0.00570613409415121	0.00855920114122682	0.094151212553495	0.0427960057061341	0	0	0.00570613409415121	0.0156918687589158	0	0	0.00427960057061341	0.0014265335235378	0.00285306704707561	0	0.00427960057061341	0	0	0	0.00570613409415121	0.0014265335235378	0.00285306704707561	0	0	0.00285306704707561	0.0128388017118402	0.00285306704707561	0	0	0.00285306704707561	0	0	0	0.00285306704707561	0	0	0.00427960057061341	0.00427960057061341	0	0.00855920114122682
M834sem	0.0124444444444444	0.00711111111111111	0.00444444444444444	0.0302222222222222	0.0924444444444444	0.00888888888888889	0.00266666666666667	0.00444444444444444	0.00533333333333333	0.0213333333333333	0	0.000888888888888889	0.127111111111111	0.0124444444444444	0	0	0.00533333333333333	0.00622222222222222	0	0	0.00177777777777778	0.000888888888888889	0.00533333333333333	0	0.00177777777777778	0.000888888888888889	0.000888888888888889	0	0	0.00533333333333333	0.000888888888888889	0	0	0.00355555555555556	0.00355555555555556	0.00622222222222222	0.008	0	0.000888888888888889	0.0168888888888889	0	0.00177777777777778	0.00266666666666667	0.00177777777777778	0	0.008	0.00355555555555556	0.000888888888888889	0.0177777777777778
M844sem	0.00504201680672269	0.00336134453781513	0	0.0638655462184874	0.0638655462184874	0.00504201680672269	0.0168067226890756	0	0.00336134453781513	0.00840336134453781	0	0.00336134453781513	0.0789915966386555	0.0100840336134454	0	0	0.00504201680672269	0.0117647058823529	0.00168067226890756	0	0	0.00168067226890756	0.00504201680672269	0	0.0134453781512605	0	0	0	0	0.0151260504201681	0	0	0	0	0.00336134453781513	0	0	0	0	0	0.00168067226890756	0.0117647058823529	0	0	0	0.00672268907563025	0	0	0.00504201680672269
M854sem	0.00140056022408964	0.00280112044817927	0.0140056022408964	0.0784313725490196	0.0448179271708683	0.0112044817927171	0.0196078431372549	0.00140056022408964	0	0.0252100840336134	0	0.0126050420168067	0.0840336134453782	0.015406162464986	0	0	0.0140056022408964	0.00700280112044818	0	0	0	0	0.00280112044817927	0	0	0	0	0.00140056022408964	0.00420168067226891	0.0126050420168067	0.00140056022408964	0	0	0.0112044817927171	0.00140056022408964	0.00420168067226891	0	0	0	0	0.00140056022408964	0.00420168067226891	0.00140056022408964	0	0	0.00280112044817927	0.00980392156862745	0.00140056022408964	0.00980392156862745
M864sem	0	0.00420757363253857	0.00140252454417952	0.0757363253856942	0.0350631136044881	0.00701262272089762	0.0308555399719495	0.00140252454417952	0.00140252454417952	0.0140252454417952	0	0.00420757363253857	0.0869565217391304	0.00981767180925666	0	0	0.0126227208976157	0.0266479663394109	0	0	0	0	0.0140252454417952	0	0.00140252454417952	0.00420757363253857	0.00280504908835905	0	0.00280504908835905	0.0126227208976157	0	0	0	0.00140252454417952	0	0.00841514726507714	0	0	0.00280504908835905	0.00420757363253857	0	0.00420757363253857	0.00140252454417952	0	0	0.0112201963534362	0.00140252454417952	0	0.00701262272089762
M874sem	0.00254129606099111	0.048284625158831	0.00381194409148666	0.0279542566709022	0.0724269377382465	0.00508259212198221	0.00889453621346887	0.00381194409148666	0.00127064803049555	0.0203303684879288	0	0.00635324015247776	0.115628970775095	0.0203303684879288	0	0.00127064803049555	0.00635324015247776	0.00508259212198221	0	0	0	0.00381194409148666	0.00508259212198221	0	0.00127064803049555	0	0.00254129606099111	0.00381194409148666	0	0.01143583227446	0	0	0	0.00127064803049555	0.00635324015247776	0.00508259212198221	0	0	0	0	0	0.00635324015247776	0.00508259212198221	0.00254129606099111	0.00127064803049555	0.00381194409148666	0.00127064803049555	0	0.0139771283354511
[truncated: 497 more columns]

## Sheet: Feces_T0_relative abundances
SampleID	Bacteria,Firmicutes,Bacilli,Lactobacillales,Streptococcaceae,Streptococcus	Bacteria,Firmicutes,Bacilli,Lactobacillales,Lactobacillaceae,Lactobacillus	Bacteria,Firmicutes,Clostridia,Clostridiales,Peptostreptococcaceae,Romboutsia	Bacteria,Firmicutes,Bacilli,Lactobacillales,Enterococcaceae,Enterococcus	Bacteria,Actinobacteria,Actinobacteria,Actinomycetales,Corynebacteriaceae,Corynebacterium	Bacteria,Firmicutes,Erysipelotrichia,Erysipelotrichales,Erysipelotrichaceae,Turicibacter	Bacteria,Actinobacteria,Actinobacteria,Actinomycetales,Dermabacteraceae,Brachybacterium	Bacteria,Proteobacteria,Gammaproteobacteria,Enterobacteriales,Enterobacteriaceae,Enterobacteriaceae_unclassified	Bacteria,Firmicutes,Clostridia,Clostridiales,Clostridiaceae_1,Clostridium_sensu_stricto	Bacteria,Firmicutes,Bacilli,Bacillales,Staphylococcaceae,Staphylococcus	Bacteria,Proteobacteria,Gammaproteobacteria,Pasteurellales,Pasteurellaceae,Gallibacterium	Bacteria,Actinobacteria,Actinobacteria,Actinomycetales,Micrococcaceae,Yaniella	Bacteria,Firmicutes,Clostridia,Clostridiales,Lachnospiraceae,Lachnospiraceae_unclassified	Bacteria,Firmicutes,Bacilli,Bacillales,Staphylococcaceae,Jeotgalicoccus	Bacteria,Firmicutes,Clostridia,Clostridiales,Peptostreptococcaceae,Terrisporobacter	Bacteria,Fusobacteria,Fusobacteriia,Fusobacteriales,Fusobacteriaceae,Fusobacterium	Bacteria,Actinobacteria,Actinobacteria,Actinomycetales,Brevibacteriaceae,Brevibacterium	Bacteria,Firmicutes,Bacilli,Bacillales,Staphylococcaceae,Salinicoccus	Bacteria,Firmicutes,Bacilli,Bacillales,Bacillaceae_1,Bacillus	Bacteria,Actinobacteria,Actinobacteria,Bifidobacteriales,Bifidobacteriaceae,Bifidobacterium	Bacteria,Actinobacteria,Actinobacteria,Actinomycetales,Dietziaceae,Dietzia	Bacteria,Actinobacteria,Actinobacteria,Coriobacteriales,Coriobacteriaceae,Olsenella	Bacteria,Bacteroidetes,Bacteroidia,Bacteroidales,Bacteroidaceae,Bacteroides	Bacteria,Firmicutes,Negativicutes,Selenomonadales,Acidaminococcaceae,Acidaminococcaceae_unclassified	Bacteria,Proteobacteria,Gammaproteobacteria,Pseudomonadales,Moraxellaceae,Psychrobacter	Bacteria,Bacteroidetes,Bacteroidia,Bacteroidales,Bacteroidales_unclassified,Bacteroidales_unclassified	Bacteria,Proteobacteria,Deltaproteobacteria,Desulfovibrionales,Desulfovibrionaceae,Desulfovibrio	Bacteria,Firmicutes,Clostridia,Clostridiales,Ruminococcaceae,Ruminococcaceae_unclassified	Bacteria,Proteobacteria,Gammaproteobacteria,Enterobacteriales,Enterobacteriaceae,Salmonella	Bacteria,Firmicutes,Clostridia,Clostridiales,Peptococcaceae_1,Peptococcus	Bacteria,Firmicutes,Bacilli,Lactobacillales,Aerococcaceae,Facklamia	Bacteria,Firmicutes,Clostridia,Clostridiales,Lachnospiraceae,Blautia	Bacteria,Actinobacteria,Actinobacteria,Coriobacteriales,Coriobacteriaceae,Collinsella	Archaea,Euryarchaeota,Methanobacteria,Methanobacteriales,Methanobacteriaceae,Methanobrevibacter	Bacteria,Actinobacteria,Actinobacteria,Bifidobacteriales,Bifidobacteriaceae,Aeriscardovia	Bacteria,Bacteroidetes,Bacteroidetes_unclassified,Bacteroidetes_unclassified,Bacteroidetes_unclassified,Bacteroidetes_unclassified	Bacteria,Firmicutes,Erysipelotrichia,Erysipelotrichales,Erysipelotrichaceae,Clostridium_XVIII	Bacteria,Firmicutes,Clostridia,Clostridiales,Ruminococcaceae,Pseudoflavonifractor	Bacteria,Firmicutes,Clostridia,Clostridiales,Ruminococcaceae,Faecalibacterium	Bacteria,Firmicutes,Erysipelotrichia,Erysipelotrichales,Erysipelotrichaceae,Erysipelotrichaceae_unclassified	Bacteria,Bacteroidetes,Bacteroidia,Bacteroidales,Porphyromonadaceae,Porphyromonadaceae_unclassified	Bacteria,Firmicutes,Negativicutes,Selenomonadales,Veillonellaceae,Veillonella	Bacteria,Firmicutes,Bacilli,Bacillales,Listeriaceae,Listeria	Bacteria,Proteobacteria,Gammaproteobacteria,Aeromonadales,Aeromonadaceae,Aeromonadaceae_unclassified	Bacteria,Bacteroidetes,Bacteroidia,Bacteroidales,Prevotellaceae,Prevotella	Bacteria,Firmicutes,Clostridia,Clostridiales,Ruminococcaceae,Intestinimonas	Bacteria,Bacteroidetes,Bacteroidia,Bacteroidales,Rikenellaceae,Alistipes	Bacteria,Firmicutes,Clostridia,Clostridiales,Ruminococcaceae,Butyricicoccus	Bacteria,Actinobacteria,Actinobacteria,Actinomycetales,Actinomycetaceae,Actinomyces
48B1J0F	0.167015323911084	0.390309029372247	0.0593737775736857	0.0713641852475466	0.0964164838342092	0.0112760855145671	0.00392877187611613	0.0222120176199466	0.0288960321104818	0.00411585625116928	0.00539143153562257	0.00319744204636291	0.013980305117608	0.00778951307039475	0.00307838835314727	0.000850383522968859	0.00319744204636291	0.000136061363675017	1.70076704593772e-05	0.0101875946051669	0.00272122727350035	0.0017858053982346	0.00600370767216014	0.00188785142099087	0.00307838835314727	0.0104086943211388	0.00115652159123765	0.00508529346735378	0	0.00122455227307516	0.00197288977328775	0.00103746789802201	0.00115652159123765	0.000680306818375087	0.000935421875265745	0.00494923210367876	0.000935421875265745	0.000221099715971903	0.000255115056890658	0.000476214772862561	0.0031294113645254	0.00054424545470007	0	0.000748337500212596	0.000714322159293842	0.000612276136537578	0.000476214772862561	0.000459207102403184	0.000170076704593772
48B2J0F	0.229600303920981	0.301921500409893	0.0744606402335393	0.109611501009737	0.0980745006298362	0.00819786855417591	0.00333913182572531	0.0468678143682643	0.01285665726911	0.00359906424329674	0.0118169275988243	0.00285925659328575	0.00491872113250555	0.00863775418391218	0.00741807130146162	0.0163157579029452	0.00211944894327475	1.99948013516486e-05	0	0.00797792573930778	0.00207945934057145	0.00083978165676924	0.000999740067582429	0.00027992721892308	0.00137964129326375	0.00137964129326375	0.000199948013516486	0.00183952172435167	0	0.00041989082838462	0.00215943854597805	0.000239937616219783	0.000739807650010997	0.000799792054065943	0.00041989082838462	0.00041989082838462	0.000239937616219783	9.99740067582429e-05	5.99844040549457e-05	0.000459880431087917	0.00055985443784616	7.99792054065943e-05	0	0.000119968808109891	0.000199948013516486	0.000219942814868134	0	1.99948013516486e-05	0.000659828444604403
48B3J0F	0.18696363765744	0.282729666263431	0.0707606916672597	0.0871273037785526	0.0840532270689533	0.0117839607201309	0.0141464455988045	0.0350103180815484	0.00553618444460258	0.00506653383619156	0.0184302284209777	0.00752864157119476	0.0152422970184302	0.0101615313456202	0.00379990037714367	0.00129509713228492	0.00691667259659859	0.000199245712659219	1.42318366185156e-05	0.0145876325339785	0.00214900732939586	0.00241941222514766	0.00624777627552836	0.00239094855191062	0.00249057140824023	0.0180886643421334	0.00372874119405109	0.00863872482743898	0	0.00150857468156266	0.00231978936881805	0.00105315590977016	0.00230555753219953	0.00129509713228492	0.00140895182523305	0.0130932896890344	0.00170782039422187	0.000483882445029531	0.000327332242225859	0.000725823667544297	0.00754287340781328	0.00234825304205508	0	0.00068312815768875	0.000341564078844375	0.000953533053440546	0.00116701060271828	0.000740055504162812	0.000142318366185156
48B4J0F	0.199709655903009	0.401498803311492	0.0451406599442853	0.0944795385882999	0.115411778553773	0.00502216816416212	0.00429630792168557	0.0151057401812689	0.00237375917134225	0.00547337858516106	0.0119472672342763	0.00355082983481775	0.00753325224624318	0.00884764782045749	0.00184407737277828	9.80892219562914e-05	0.00247184839329854	0.00011770706634755	0	0.0186173343273041	0.00258955545964609	0.00137324910738808	0.000961274375171656	0.000667006709302782	0.00109859928591046	0.00341350492407894	0.000608153176129007	0.00311923725821007	0	0.00092203868638914	0.0021187271942559	0.000588535331737749	0.00137324910738808	0.000843567308824106	0.00129477772982305	0.00207949150547338	0.000392356887825166	9.80892219562914e-05	9.80892219562914e-05	0.000451210420998941	0.00119668850786676	0.0015498097069094	0	0.000294267665868874	9.80892219562914e-05	0.000431592576607682	0.000255031977086358	0.000215796288303841	0.000863185153215365
48C1J0F	0.124327832375301	0.375783422955683	0.0177823104023734	0.073168922677545	0.0756350825143705	0.00650843686259967	0.04416836640089	0.00127943630632301	0.00567402188021509	0.0180233636195068	0.00754681995178936	0.0210087150009271	0.0255887261264602	0.013498980159466	0.000760244761728166	0.000166882996476915	0.0135546078249583	0.00367142592249212	0	0.0133320971629891	0.00528462822176896	0.00320786204338958	0.0157055442239941	0.00333765992953829	0.000129797886148711	0.0137956610420916	0.00357871314667161	0.00941961802336362	0	0.0034860003708511	0.00144631930279993	0.003467457815687	0.00202113851288708	0.000927127758205081	0.0023549045058409	0.00717596884850732	0.00257741516781012	0.00174300018542555	0.000203968106805118	0.00261450027813833	0.00352308548117931	0.00333765992953829	0	0.000259595772297423	0.000611904320415353	0.000797329872056369	0.000852957537548674	0.000945670313369182	0.000203968106805118
48C2J0F	0.152099847031011	0.361910721735503	0.0489674593241552	0.0794048115700181	0.0837852871645112	0.0115769712140175	0.039094006396885	0.00976915588930608	0.0150883048254763	0.0248922263941037	0.00500625782227785	0.0288728966764011	0.00288555138367404	0.0134021693783897	0.00375469336670839	0.00311152829926297	0.0151752190237797	0.00544082881379502	0	0.00863927131136142	0.00945626477541371	0.00017382839660687	0.00100820470031984	6.95313586427479e-05	0.000156445556946183	0.000990821860659157	0.00017382839660687	0.00139062717285496	0	0.000225976915588931	0.00149492421081908	0.000225976915588931	0.000312891113892365	8.69141983034348e-05	0.00297246558197747	0.00224238631622862	0.00017382839660687	8.69141983034348e-05	1.7382839660687e-05	6.95313586427479e-05	0.000278125434570991	0.000312891113892365	1.7382839660687e-05	0.000104297037964122	1.7382839660687e-05	0.000156445556946183	6.95313586427479e-05	0.000121679877624809	0.000104297037964122
48C4J0F	0.128764398390156	0.373594855900449	0.0247490401073229	0.0710089281583939	0.0722810750797983	0.00846555951334598	0.0573853911273535	0.00661516399130314	0.018920294212888	0.0418420687421936	0.00263681361891104	0.0366378313364482	0.00645325438312439	0.0185502151084794	0.00566683628625619	0.000601378544663922	0.0197298422537817	0.00587500578248601	0	0.00966831660267382	0.0080260905768608	0.00025442938428089	0.00814174029698848	0.00106397742517463	0.000231299440255355	0.00353888143590692	0.00127214692140445	0.00261368367488551	0	0.00101771753712356	0.00152657630568534	0.000555118656612851	0.000300689272331961	4.62598880510709e-05	0.00402461026044317	0.00300689272331961	0.000439468936485174	0.000161909608178748	6.93898320766064e-05	0.000370079104408567	0.00106397742517463	0.000809548040893741	0	9.25197761021418e-05	0.000346949160383032	0.000138779664153213	0.000601378544663922	0.000185039552204284	0.000231299440255355
48D1J0F	0.156330101037499	0.0509798603105716	0.0777920933071133	0.0600528921136502	0.12148911643046	0.0121923103004001	0.0896995999186275	0.00204787414389367	0.0165728622770733	0.0394385298704821	0.000854411066657625	0.0630229877263172	0.0212924662643249	0.0604597545263443	0.00566894961687123	1.35620804231369e-05	0.0208856038516308	0.0422051942768021	5.42483216925476e-05	0.00265816776293483	0.00873397979250017	0.00259035736081915	0.0243032481182613	0.00184444293754662	0.00303790601478267	0.00682172645283787	0.00123414931850546	0.0109039126602021	0	0.00117990099681291	0.013968942835831	0.00138333220315996	0.00263104360208856	0.000230555367193327	6.78104021156845e-05	0.00806943785176646	0.00119346307723605	0.000325489930155286	0.00052892113650234	0.00126127347935173	0.00170882213331525	0	0	2.71241608462738e-05	0.000366176171424697	0.000474672814809792	0.000990031870888994	0.000759476503695667	0.000284803688885875
48D2J0F	0.132007622326039	0.0724582001475289	0.159085320875338	0.10847983771822	0.147067863289894	0.0158132530120482	0.0457800590115564	0.00571674452913696	0.04481190066388	0.0396944922547332	0.0384650848291124	0.0461949840177035	0.00439513154659454	0.0271852716990411	0.0188560363904598	0.000522498155888862	0.0217297762478485	0.0105421686746988	0	0.00178264076715023	0.00571674452913696	0.000753012048192771	0.000860585197934596	9.22055569215638e-05	0.000153675928202606	0.000860585197934596	0.000215146299483649	0.00109109909023851	0	0.00023051389230391	0.00640828620604868	0.000414925006147037	0.00162896483894763	0.00130624538972215	0.000522498155888862	0.000875952790754856	0.000122940742562085	6.14703712810425e-05	0.000169043521022867	0.00023051389230391	0.000384189820506516	0	0	3.07351856405213e-05	6.14703712810425e-05	4.61027784607819e-05	4.61027784607819e-05	4.61027784607819e-05	0.000353454634865995
48D3J0F	0.0348378374129447	0.0973918785077583	0.049662783568363	0.0254523730918581	0.237749375088431	0.00625697621405776	0.0458425694477197	0.000660283922086497	0.0165542611894543	0.0930843119684321	0.00238959895612256	0.0616893835777956	0.0040874718986307	0.132292600103759	0.00609976575641812	0.000676004967850461	0.0207046172711409	0.0249178575358833	1.57210457639642e-05	0.00204373594931535	0.00334858274772438	0.00163498875945228	0.000204373594931535	1.57210457639642e-05	0.00410319294439466	0.000188652549167571	1.57210457639642e-05	0.00229527268153878	0	0.000676004967850461	0.0242261315222689	0.000581678693266676	0.00125768366111714	0.000848936471254068	0.000393026144099105	9.43262745837853e-05	4.71631372918927e-05	6.28841830558569e-05	6.28841830558569e-05	0.000251536732223428	0.000251536732223428	0	0	0.000330141961043249	0	0.000235815686459463	1.57210457639642e-05	0.000220094640695499	3.14420915279284e-05
48D4J0F	0.068289384719405	0.103158504781223	0.124859139057922	0.067629350590811	0.106201101130107	0.0120415982484948	0.099053414469236	0.00318748188930745	0.0807012460156476	0.0349335136353392	0.0224572587655752	0.0624617663157217	0.00695450594030716	0.041871921182266	0.0160018030200586	0.00996490550243086	0.0271901864193953	0.0392478830612705	0	0.00367043369071767	0.0100453974693326	0.000402459834508516	0.0011107891432435	6.43935735213626e-05	8.04919669017032e-05	0.000338066260987153	3.21967867606813e-05	0.00114298593000419	0	0.000177082327183747	0.00724427702115329	0.000321967867606813	0.000434656621269197	0.000225377507324769	0.00024147590070511	0.000177082327183747	0.000225377507324769	3.21967867606813e-05	4.82951801410219e-05	0.000305869474226472	0.000112688753662384	0	0	6.43935735213626e-05	1.60983933803406e-05	0	3.21967867606813e-05	1.60983933803406e-05	8.04919669017032e-05
71J0F	0.0126944799658994	0.221187659846547	0.225490196078431	0.0273737212276215	0.0139332907075874	0.127637468030691	0.0145460358056266	0.0129342497868713	0.0752477621483376	0.00227781329923274	0.00772591645353794	0.0106830775788576	0.0415734228473998	0.0014652600170503	0.0350063938618926	0.0218190537084399	0.00659367007672634	0.00636722080136402	7.9923273657289e-05	0.00339673913043478	0.00213128729752771	0.00115888746803069	0.0120550937766411	0.00245098039215686	2.66410912190963e-05	0.00705988917306053	0.00197144075021313	0.0148790494458653	1.33205456095482e-05	0.000839194373401535	0	0.00138533674339301	0.000892476555839727	0.000612745098039216	0.001798273657289	0.0014652600170503	0.0120151321398124	0.00299712276214834	0.00133205456095482	0.00671355498721228	0.00170502983802217	0.000119884910485934	0	0.00050618073316283	0.00141197783461211	0.000572783461210571	0.000306372549019608	0.000719309462915601	0.00751278772378517
72J0F	0.00093114133504297	0.446520431683229	0.0822915235609287	0.00344980232327395	0.00844133046358627	0.018806002045458	0.00206072262673444	0.000396879913297004	0.00181648883393629	0.00126696280014043	0.00694539848269756	0.00158751965318801	0.159087786783899	0.000274763016897926	0.00654851856940056	0.0353223122834333	0.00132802124833997	0.0012974920242402	9.15876722993085e-05	0.00747965990444353	0.000686907542244814	0.00775442292134145	0.0159362549800797	0.00344980232327395	0	0.0124253942086062	0.00280868861717879	0.0341316725435423	1.52646120498848e-05	0.00189281189418571	9.15876722993085e-05	0.00592266947535528	0.00325136236662545	0.000763230602494238	0.000122116896399078	0.00367877150402223	0.0133870647677489	0.00170963654958709	0.0050067927523622	0.0106241699867198	0.00209125185083421	0	0	0	0.00396879913297004	0.00169437193753721	0.000732701378394468	0.00317503930637603	0.00844133046358627
73J0F	0.0146697388632873	0.357388632872504	0.105437788018433	0.0285560675883257	0.0137173579109063	0.0839170506912442	0.00368663594470046	0.00043010752688172	0.0125652841781874	0.0238863287250384	0.0409677419354839	0.00339477726574501	0.0673886328725038	0.00113671274961598	0.0127342549923195	0.0306144393241167	0.00202764976958525	7.68049155145929e-05	0.000460829493087558	0.00170506912442396	0.00405529953917051	0.00419354838709677	0.0314592933947773	0.0047926267281106	0	0.0192626728110599	0.0113671274961598	0.0221044546850998	0	0.00645161290322581	0	0.00268817204301075	0.00213517665130568	0.00207373271889401	0.000645161290322581	0.00416282642089094	0.00370199692780338	0.00302611367127496	0.00313364055299539	0.00577572964669739	0.00357910906298003	0.000245775729646697	0	0	0.00311827956989247	0.00133640552995392	0.00138248847926267	0.00125960061443932	0.00250384024577573
74J0F	0.00986327976813705	0.305291270238691	0.182758986965296	0.0177083807529476	0.0123366868484545	0.112835920547488	0.00969636272590704	0.0212136386397778	0.0450676014021032	0.0089831717272879	0.00590279358431587	0.00725330419872233	0.0374804631189208	0.000698016722052776	0.0340207280617897	0.0463574149102442	0.00534134535136037	0.000652493892353682	7.58713828318235e-05	0.00100150225338007	0.00212439871929106	0.00179056463483103	0.0087707318553588	0.00113807074247735	0	0.00273136978194565	0.0010318508065128	0.0105461222136235	0	0.000758713828318235	0.000136568489097282	0.00171469325199921	0.000789062381450964	0.000819410934583694	0.000561448232955494	0.00223061865525561	0.00714708426275777	0.000622145339220953	0.000940805147114611	0.00704086432679322	0.00130498778470736	0.000136568489097282	0	0	0.00200300450676014	0.000409705467291847	0.000242788425061835	0.000424879743858212	0.00364182637592753
HB31J0F	0.00231860338243317	0.466601882160393	0.25886524822695	0.0264252591380251	0.00247204037097654	0.104814511729405	0.00339266230223677	0.0026936715766503	0.0159915439170758	0.000392116748499727	0.0138945717403164	0.00371658483360611	0.00427918712493181	0.000136388434260775	0.0327502727768685	0.00393821603927987	0.00136388434260775	0.00124454446262957	3.40971085651937e-05	0.000613747954173486	0.00192648663393344	0.000545553737043099	0.00196058374249864	0.000511456628477905	0	0.0021481178396072	0.000733087834151664	0.00148322422258592	3.40971085651937e-05	0.000392116748499727	0	0.000494408074195308	0.000392116748499727	0.000170485542825968	0.00405755591925805	0.000869476268412439	0.00301759410801964	0.000392116748499727	0.000784233496999454	0.00516571194762684	0.000409165302782324	8.52427714129842e-05	0	3.40971085651937e-05	0.00069899072558647	6.81942171303873e-05	0.000187534097108565	0.000443262411347518	0.000852427714129842
HB32J0F	0.00359558256998545	0.481311531546957	0.145569728619125	0.035270952829381	0.00321890249122507	0.0327198013868676	0.0239705504665696	0.0099477784436264	0.0166766543960277	0.00832120537625203	0.0330451160003424	0.0111805496104786	0.0247410324458522	0.000479411009331393	0.028199640441743	0.0296378734697372	0.0058899066860714	0.00195188768084924	1.71218217618355e-05	0.00208886225494393	0.00409211540107867	0.00179779128499272	0.00970807293896071	0.000856091088091773	0	0.00577005393373855	0.00207174043318209	0.00784179436692064	0	0.00114716205804298	8.56091088091773e-05	0.00181491310675456	0.00184915675027823	0.000205461861142026	0.00751647975344577	0.00237993322489513	0.00249978597722798	0.000924578375139115	0.000838969266329938	0.00390377536169848	0.0015923294238507	1.71218217618355e-05	0	0.000102730930571013	0.00152384213680336	0.000496532831093228	0.000273949148189367	0.000907456553377279	0.00231144593784779
HB33J0F	0.00401464887145462	0.51871715113161	0.178498643906774	0.0131778550742404	0.0115689309081994	0.0569712385651461	0.00648166592605078	0.000934708325033328	0.0230152771180337	0.00225249383245736	0.0222337996659567	0.00602197330718193	0.0143730558832994	0.00036775409509508	0.0298340509645883	0.00776880525888356	0.00228314000704862	0.000413723356981965	0	0.000597600404529505	0.00226781691975299	0.00111858537258087	0.00874948284580377	0.0018387704754754	0	0.00953096029788082	0.00108793919798961	0.00718652794164968	0	0.000750831277485788	0.000107261611069398	0.000904062150442071	0.00107261611069398	0.000260492484025681	0.00845834418718684	0.00223717074516174	0.00568486538667811	0.000735508190190159	0.000291138658616938	0.00631311196579887	0.000934708325033328	7.66154364781416e-05	0	0	0.0010266468488071	9.19385237737699e-05	0.000229846309434425	0.000842769801259558	0.00432111061736719
HB34J0F	0.00236259166855674	0.37824147576926	0.146367279050427	0.00606713540485371	0.00334542980267634	0.0480645649051183	0.0186361230815756	0.00364784153625161	0.0142889544114312	0.0125878884100703	0.00485748847055266	0.0255726922204582	0.0396159370983594	0.00103954033416497	0.0192031450820292	0.0892114614047025	0.00644515007182279	0.00359113933620624	0	0.000831632267331972	0.00612383760489907	0.00313752173584335	0.0162735314130188	0.00334542980267634	0	0.00608603613820216	0.00561351780449081	0.0197890678158313	0	0.00219248506842065	9.45036667422696e-05	0.00423376427005368	0.00376124593634233	0.000812731533983519	0.00489528993724957	0.00498979360399184	0.0164625387465034	0.00285401073561654	0.0019278748015423	0.00948816814092387	0.00281620926891963	5.67022000453618e-05	0	0	0.00137975353443714	0.000415816133665986	0.000548121267105164	0.00309972026914644	0.000680426400544341
LAND11J0F	0.0545395501469884	0.326314350174335	0.103575579407944	0.196896150953716	0.0210740411567649	0.0253298694195666	0.0230737676898886	0.00319614411704382	0.0141006358104875	0.00165789293771792	0.133998769399057	0.0117419840021877	0.000683667190811513	0.00434128666165311	0.0177069802420182	0.00314486907773296	0.00837492308744103	0.00514459561085664	3.41833595405757e-05	0.00023928351678403	0.0043583783414234	0.000136733438162303	5.12750393108635e-05	0	0	1.70916797702878e-05	0	0.00015382511793259	0	8.54583988514391e-05	0.00078621726943324	3.41833595405757e-05	0.00015382511793259	3.41833595405757e-05	0.000564025432419498	3.41833595405757e-05	0	0	0	0.000598208791960074	0	0.00184590141519108	0	3.41833595405757e-05	0	1.70916797702878e-05	1.70916797702878e-05	0	0.00369180283038217
LAND12J0F	0.09141787982734	0.083441382592854	0.165422048613961	0.0751366344433685	0.0323327151274434	0.112393113295803	0.088004070311346	0.00832116069523544	0.0267032119352033	0.0339083195194407	0.0241100297067078	0.0562457942851516	0.00305273350949466	0.0187595397922172	0.01711828521722	0.000410313643749282	0.0416386285676771	0.0505670534556615	6.56501829998851e-05	0.0014278914802475	0.0238146038832083	0.000853452378998507	0.00100116529074825	0.000229775640499598	0.000377488552249339	0.00100116529074825	0.00026260073199954	0.00113246565674802	0	0.000361076006499368	0.000393901097999311	0.000213363094749627	0.000558026555499024	0.000147712911749741	0.000295425823499483	0.00077138965024865	0.000361076006499368	3.28250914999426e-05	6.56501829998851e-05	0.000180538003249684	0.000787802195998621	6.56501829998851e-05	0	9.84752744998277e-05	1.64125457499713e-05	6.56501829998851e-05	3.28250914999426e-05	0.000114887820249799	0.000426726189499253
LAND13J0F	0.114322932820545	0.183611438496371	0.191572069557306	0.117858693629427	0.0199325930980295	0.0919918119223373	0.0318838781713293	0.0113102991956661	0.0395550317391394	0.00518991791245374	0.0441659946653433	0.0194363459669582	0.00814672373508674	0.00643053574013192	0.0197258234600831	0.00500382523830201	0.0124061782767818	0.0088083865765151	8.27078551785456e-05	0.000413539275892728	0.00612038128321237	0.00194363459669582	0.000682339805223001	0.000330831420714182	8.27078551785456e-05	0.00109587908111573	0.000144738746562455	0.00208837334325828	4.13539275892728e-05	0.000413539275892728	0.000930463370758638	0.000475570167276637	0.000661662841428365	6.20308913839092e-05	0.000537601058660546	0.000827078551785456	0.000351508384508819	0.000144738746562455	0.000372185348303455	0.00117858693629427	0.000372185348303455	0.000268800529330273	0	0	4.13539275892728e-05	0.000248123565535637	2.06769637946364e-05	0.000310154456919546	0.000372185348303455
LAND14J0F	0.12848126917955	0.186555497655029	0.106208866500685	0.0890703105398259	0.0670874104954355	0.0457221160712563	0.0688630266535425	0.0010808098353695	0.0366703337000367	0.0237006156756026	0.00862717850732442	0.0493312489143651	0.00741126744253373	0.0255727327118677	0.0118889081890645	0.000463204215158358	0.0316136876845579	0.0222145021519696	5.79005268947947e-05	0.00416883793642522	0.0209985910871789	0.00138961264547507	0.00283712581784494	0.000482504390789956	5.79005268947947e-05	0.00233532125142339	0.000386003512631965	0.00127381159168548	0	0.000289502634473974	0.00434253951710961	0.000501804566421554	0.00102290930847471	3.86003512631965e-05	0.0044390403952676	0.0011001100110011	0.000559705093316349	5.79005268947947e-05	7.7200702526393e-05	0.000405303688263563	0.00102290930847471	0	1.93001756315982e-05	3.86003512631965e-05	0.000135101229421188	0.00032810298573717	0.000115801053789589	0.000212301931947581	9.65008781579912e-05
LAND41J0F	0.151122173649313	0.219916752075969	0.0483381790039532	0.0639628521826434	0.0390303081009852	0.0248697943901776	0.004957225626974	0.00405781338241754	0.0391348909201196	0.00430881214834027	0.0087640402434688	0.0026773201698425	0.0441966993662281	0.00633771883954904	0.00485264280783953	0.00064841347863373	0.00324206739316865	0.000815745989248886	0	6.27496914806835e-05	0.00284465268045765	0.0191595724654354	0.0383400614946977	0.0171934154657073	0.00870129055198812	0.0256646238155996	0.00441339496747474	0.0181137442740907	0	0.00286556924428455	0.000920328808383359	0.00359764897822586	0.00702796544583656	0.000752996297768203	0.00131774352109435	0.0297015206341902	0.00393231399945617	0.00181974105293982	0.00219623920182392	0.00280281955280387	0.00679788324374072	0.000501997531845468	0	0.0129891861365015	0.00211257294651635	0.00175699136145914	0.000836662553075781	0.00221715576565082	8.36662553075781e-05
LAND42J0F	0.157693412829538	0.217459234250413	0.125547733639825	0.1153114000431	0.0566230874218806	0.0330256447094318	0.00716543351770706	0.0419330507865814	0.0576108038215645	0.00123913511960348	0.0282127720709719	0.00285539831908627	0.00721930895768982	0.00366352991882767	0.0136304863156382	0.0584368939013002	0.00375332231879894	0.00167013863946556	0	0.00175993103943682	0.00592629839810358	0.00149055383952302	0.00393290711874147	0.000646505279793118	0.000628546799798865	0.00319660943897709	0.000377128079879319	0.00224480999928166	0	0.000143667839954026	0.000215501759931039	0.000395086559873572	0.000915882479706918	0.00016162631994828	0.000987716399683931	0.00307090007901731	0.000323252639896559	0.000377128079879319	0.000664463759787372	0.000215501759931039	0.00100567487967818	0.00639321887795417	0	0.000179584799942533	0.000269377199913799	0.000215501759931039	0.00010775087996552	0.000143667839954026	0
LAND43J0F	0.203631786163859	0.193132817312585	0.0907143048450599	0.11781878565498	0.0877145994589817	0.0293810429332833	0.0144494737124032	0.0203685352331467	0.0253100141950344	0.00285239842515467	0.0914642311915794	0.00853041219165975	0.00215603824624367	0.00929373008008142	0.00929373008008142	0.000910624849345154	0.00994991563328602	0.00695021024720786	0	0.00125880493880065	0.0113694190749123	0.000334788547553365	0.000482095508476846	0.000147306960923481	0.00324075314031658	0.000495487050378981	0.000133915419021346	0.000374963173259769	0	0.000267830838042692	0.000602619385596058	0.000187481586629885	0.000187481586629885	0	0.00148646115113694	0.000709751720813134	0.000120523877119212	4.01746257064038e-05	8.03492514128077e-05	8.03492514128077e-05	0.000254439296140558	0.00145967806733267	0	0.00246404370999277	6.69577095106731e-05	6.69577095106731e-05	5.35661676085384e-05	4.01746257064038e-05	0.000160698502825615
LAND44J0F	0.119424580076501	0.288807583568934	0.0662730750041577	0.065957092965242	0.0779976717112922	0.0146183269582571	0.0281722933643772	0.00164643272908698	0.0174787959421254	0.00350906369532679	0.0244636620655247	0.011192416431066	0.0231332113753534	0.016730417428904	0.00745052386495925	0.00284383835024114	0.0169965075669383	0.00587061367038084	4.98919008814236e-05	0.0002827207716614	0.0136371195742558	0.00196241476800266	0.0297522035589556	0.00487277565275237	0.00156327956095127	0.0127556959920173	0.00385830700149676	0.00753367703309496	0	0.00109762181939132	0.00139697322467986	0.0010477299185099	0.00187926159986695	0.00069848661233993	0.00823216364543489	0.0151837685015799	0.00144686512556128	0.00207882920339265	0.000399135207051389	0.00148012639281557	0.00849825378346915	0.00761683020123067	0	0.000465657741559953	0.000864792948611342	0.00069848661233993	0.000648594711458507	0.000532180276068518	4.98919008814236e-05
LI11J0F	0.261823145760655	0.229091460640073	0.063264067950857	0.135916881541028	0.123418777491279	0.0199757318367966	0.00292734718640983	0.0245563476414379	0.0142272106779918	0.00154709540421659	0.00611254360685576	0.00280600637039284	0.00186561504626119	0.0144395571060215	0.00582435916881541	0.00138025178219324	0.00218413468830578	0.000333687244046716	0	0.0339905960867587	0.00154709540421659	0.000409525254057334	0.000106173214014864	9.10056120127408e-05	0.00229030790232064	0.00034885484604884	0	0.000940391324131655	0	0.000227514030031852	0.00239648111633551	0.000288184438040346	0.000333687244046716	0.000485363264067951	0.00536933110875171	0.000197178826027605	3.03352040042469e-05	3.03352040042469e-05	1.51676020021235e-05	9.10056120127408e-05	1.51676020021235e-05	0.00141058698619748	0	0.000212346428029728	0	7.58380100106173e-05	0	6.06704080084939e-05	0.000182011224025482
LI12J0F	0.201939181896006	0.278873711244277	0.0449622213123907	0.0778464287043585	0.0897011203334946	0.0125432686939368	0.00591804071909778	0.0164327986005136	0.0187776826590241	0.00526668403617821	0.00169352737559087	0.00521085346335653	0.0244724010868352	0.010384486544832	0.00560166747310827	0.00906316298805226	0.00342427513306287	9.30509547027953e-05	0	0.0131387948040347	0.00275430825920274	0.00238210444039156	0.0176238508207094	0.00241932482227268	0.00286596940484609	0.00686716045706629	0.00124688279301746	0.0196337514422898	0	0.00241932482227268	0.00182379871217479	0.00199129043063982	0.00059552611009789	0.00294041016860833	0.00152603565712584	0.0259798265530204	0.000930509547027952	0.000911899356087393	0.00137715412960137	0.00135854393866081	0.00228905348568876	0.00059552611009789	0	0.000279152864108386	0.00158186622994752	0.00139576432054193	0.00962146871626903	0.000725797446681803	3.72203818811181e-05
LI13J0F	0.16268770327313	0.27047724494268	0.0540677692431896	0.0910894286439231	0.109242728300233	0.0229511221830093	0.00154545244850414	0.00657393951975642	0.00532835097917099	0.00186838281087814	0.002906373261366	0.00343690171383757	0.0332156944156114	0.013886005582082	0.00279104098908957	0	0.00228357899107328	0.000645860724747999	2.30664544552857e-05	0.00668927179203285	0.00147625308513828	0.00172998408414643	0.0242428436325052	0.00431342698313842	0.000230664544552857	0.0275644130740664	0.00345996816829285	0.0143934675800983	0	0.00272184162572371	0.00202984799206514	0.00495928770788642	0.00558208197817913	0.002260512536618	0.000645860724747999	0.026641754895855	0.00122252208613014	0.00117638917721957	0.00445182570987014	0.00172998408414643	0.00380596498512214	4.61329089105714e-05	0	2.30664544552857e-05	0.00207598090097571	0.000991857541577284	0.00355223398611399	0.00152238599404885	6.9199363365857e-05
LI14J0F	0.176845469240631	0.222905557310344	0.0641199531781275	0.0866576243473737	0.0427714089296	0.0245814830642314	0.00057598335222311	0.0107393025027406	0.00752494379517289	0.000910425298675238	0.0123743520187287	0.00113338659630999	0.0554244625703722	0.0048122480072834	0.00325151892384014	0.00196949146244031	0.00115196670444622	0.000204381189498523	0	0.00650303784768027	0.000408762378997046	0.00217387265193883	0.0114639267200535	0.00367886141097341	0.000371602162724587	0.0623734230133219	0.000984745731220156	0.0322550677244942	0	0.00527675071068914	0.000929005406811468	0.00343732000520243	0.00209955221939392	0.00399472324928931	0.00131918767767228	0.0315676037234537	0.00245257427398227	0.00180227048921425	0.00423626465506029	0.00239683394957359	0.00834246855316698	0.00813808736366846	0	0	0.000613143568495569	0.00209955221939392	0.00901135244607124	0.00167220973226064	0.000427342487133275
LI21J0F	0.248351189647976	0.342924725198275	0.0355085571170168	0.105635174620843	0.0741199387783498	0.00656741338527898	0.00230972589397523	0.034005843884792	0.016947265896758	0.00396549325170447	0.00453596771949353	0.00285237233894532	0.0115486294698762	0.00811186865173229	0.0027410602476694	0.00595519688326144	0.00101572283289272	4.17420342284681e-05	0	0.0174759983303186	0.00116877695839711	0.00123834701544455	0.00186447752887157	0.00043133435369417	0.00116877695839711	0.00257409211075553	0.00043133435369417	0.00653958536246	0	0.00197578962014749	0.00203144566578545	0.000751356616112425	0.000542646444970085	0.000904410741616808	0.00119660498121608	0.00542646444970085	0.000542646444970085	0.000347850285237234	0.000389592319465702	0.000681786559064978	0.00315848058995408	0.00020871017114234	0	0.00200361764296647	6.95700570474468e-05	0.000598302490608042	0.00200361764296647	0.000278280228189787	6.95700570474468e-05
LI22J0F	0.0948785455267995	0.2824499528091	0.0399880780885202	0.0377361614756677	0.0427864156441972	0.0246882916894342	0.000496746311658636	0.00192075240508006	0.00538141837630189	0.000331164207772424	0.00347722418161045	0.000844468729819681	0.0819962578444522	0.00470253175036842	0.00202010166741179	0.00013246568310897	0.000728561257099333	0.000182140314274833	1.65582103886212e-05	0.00556355869057672	0.000629211994767605	0.00435480933220737	0.0124683324226318	0.00990180981239548	0.00112595830642624	0.0857715298130578	0.000844468729819681	0.0456509860414286	0	0.00637491099961916	0.000844468729819681	0.00715314688788436	0.0047687645919229	0.00266587187256801	0.00125842398953521	0.0321229281539251	0.00918980676568477	0.00284801218684285	0.00264931366217939	0.00509992879969533	0.0184789627937013	0.000877585150596923	0	8.2791051943106e-05	0.000844468729819681	0.00400708691404633	0.0177007269054361	0.00375871375821701	0.000397397049326909
LI24J0F	0.211471553066702	0.389376718910501	0.0552702210146128	0.0947678849531131	0.0312800291593492	0.0105039928427052	0.000414195301368501	0.0341959640809835	0.0254647271281355	0.0117465787468107	0.0015739421452003	0.000347924053149541	0.0113158156333875	0.00478809768381987	0.00392657145697339	0.00743894761257828	0.00014911030849266	1.65678120547401e-05	1.65678120547401e-05	0.0375095264919315	6.62712482189602e-05	0.000646144670134862	0.00154080652109082	0.000314788429040061	0.00207097650684251	0.0102223400377746	0.000298220616985321	0.00680937075449816	0	0.00129228934026972	0.000844958414791743	0.0010769077835581	0.000629576858080122	0.000728983730408562	0.00109347559561284	0.00235262931177309	0.000563305609861162	0.000381059677259021	0.000447330925477981	0.000480466549587461	0.00144139964876238	0.000331356241094801	8.28390602737003e-05	0.00117631465588654	6.62712482189602e-05	0.000513602173696942	0.00127572152821498	0.000281652804930581	0.000695848106299082
M221J0F	0.0781024407012719	0.411395668614644	0.0292712272258508	0.0295806118941217	0.0457717428669646	0.00529391543485734	0.0521141285665177	0.00304228257133035	0.00438294946717085	0.0313853557923685	0.000257820556892403	0.0284633894809213	0.0264008250257821	0.0254726710209694	0.00323135097971812	0.000275008594018563	0.0194568580268133	0.0014266070814713	0	0.000739085596424888	0.012341010656583	0.00599862495702991	0.039910622206944	0.00660020625644551	0.00324853901684428	0.0201443795118597	0.00288759023719491	0.0132519766242695	0	0.00228600893777931	0.00479546235819869	0.00335166723960124	0.00225163286352699	0.00357511172224132	0.00130629082158817	0.00940185630800962	0.00299071845995187	0.00170161567548986	0.000618769336541767	0.00146098315572362	0.00450326572705397	5.15641113784806e-05	0	5.15641113784806e-05	0.00128910278446201	0.00091096596768649	0.00501890684083878	0.00140941904434514	6.87521485046408e-05
M222J0F	0.0933161184087422	0.339526963811235	0.0368811047490738	0.0459937876576475	0.0497735863178773	0.00449084989334231	0.120148946521463	0.0108154634931327	0.00823322480446091	0.0200029938999289	0.00235769619400472	0.04165263276075	0.00402305302945249	0.016503873358033	0.00529546049923281	0.00145952621533625	0.0625163728902361	0.0297331686688372	0	0.000954305602335242	0.0200591295235957	0.000991729351446428	0.00250739119044946	0.000224542494667116	0.0074660379476816	0.00117884809700236	0.000168406871000337	0.001609221211781	0	0.000205830620111523	0.00366752741289622	0.00037423749111186	0.000486508738445417	0.00114142434789117	0.00117884809700236	0.000561356236667789	0.000112271247333558	5.61356236667789e-05	7.48474982223719e-05	0.000130983121889151	0.000804610605890498	0.00018711874555593	0	0.00018711874555593	0.000243254369222709	0.000168406871000337	0.000205830620111523	5.61356236667789e-05	0.00018711874555593
M223J0F	0.156062731097794	0.280759913298483	0.0224828934506354	0.0508946406562115	0.00403757065748651	0.00739512941476476	0.00726762718347571	0.0106039355688725	0.00760763313357984	0.00204003570062476	0.00265629648518849	0.00340005950104127	0.0517021547877088	0.00221003867567682	0.0016150282629946	0.0010625185940754	0.00182753198180968	0.000340005950104127	0	0.00246504313825492	0.00125377194100897	0.0138552424667432	0.0760125802201538	0.021462875600323	0.000403757065748651	0.0558034765608398	0.0103276807344129	0.0323643163755366	2.12503718815079e-05	0.00365506396361936	0.000276254834459603	0.00716137532406817	0.00501508776403587	0.00703387309277912	0.000850014875260317	0.0242891750605636	0.00476008330145778	0.00531259297037698	0.00614135747375579	0.00286880020400357	0.0129627268477198	0.000446257809511666	0	0	0.00195503421309873	0.00204003570062476	0.00945641548727103	0.00378256619490841	0.000191253346933571
M224J0F	0.133829323202476	0.315973687913325	0.0205431264950049	0.0332066976220628	0.0159349936682144	0.00670113972140144	0.0237617841564655	0.00636696214999296	0.00573378359364007	0.0034121288870128	0.000105529759392149	0.0100429154354861	0.0385359504713663	0.00249753763894752	0.00167088785704235	0.00036935415787252	0.01276910088645	0.00501266357112706	0	0.0017764176164345	0.00907555930772478	0.0116434501196004	0.0792880258899676	0.0169199380892078	0.000158294639088223	0.0375685943436049	0.0155128746306458	0.0301463345996904	0	0.00490713381173491	0.000386942451104545	0.00506542845082313	0.00490713381173491	0.00335936400731673	0.00117841564654566	0.0157415224426622	0.0040453074433657	0.00323624595469256	0.00279653862389194	0.00372871816518925	0.0243773744195863	0.000105529759392149	0	0	0.00302518643590826	0.00242718446601942	0.00715843534543408	0.00274377374419586	0.000140706345856198
M71J0F	0.0875769230769231	0.315782051282051	0.0172820512820513	0.0374358974358974	0.0291666666666667	0.00497435897435897	0.0022051282051282	0.00756410256410256	0.00125641025641026	0.00597435897435897	0.000615384615384615	0.00184615384615385	0.0416153846153846	0.00915384615384615	0.00058974358974359	0.000179487179487179	0.000833333333333333	1.28205128205128e-05	0	0.00557692307692308	0.000282051282051282	0.0200769230769231	0.0810384615384615	0.0152179487179487	0.0457435897435897	0.0328076923076923	0.00948717948717949	0.0188461538461538	0	0.00735897435897436	0.0022051282051282	0.00416666666666667	0.00575641025641026	0.00567948717948718	0.000448717948717949	0.0529102564102564	0.0031025641025641	0.00135897435897436	0.00157692307692308	0.00212820512820513	0.013974358974359	6.41025641025641e-05	0	0	0.000102564102564103	0.00243589743589744	0.00753846153846154	0.0015	0.000474358974358974
M72J0F	0.162393784457505	0.326352371768045	0.0936880219800215	0.0539856984297385	0.0279844975345257	0.0239087319638276	0.00629560217616769	0.00826070343346859	0.0483633253880165	0.00336614567222839	0.00141923979693954	0.00187412434724067	0.0240542950199239	0.00358449025637293	0.0109718153532633	0.0306956094543205	0.00227442275150567	0.000145563056096363	0	0.00835168034352881	0.00329336414418021	0.00453065012099929	0.0336250659582598	0.00371185793045725	0.00809694499536018	0.0140832256773231	0.00127367674084317	0.00849724339962517	0	0.00109172292072272	0.00054586146036136	0.00149202132498772	0.00223803198748158	0.00178314743718044	0.00129187212285522	0.0147018686657326	0.000946159864626358	0.000600447606397496	0.000727815280481814	0.00110991830273477	0.00582252224385451	5.4586146036136e-05	0	1.81953820120453e-05	7.27815280481814e-05	0.000691424516457723	0.00187412434724067	0.000691424516457723	0.000127367674084317
M73J0F	0.132293502839948	0.36440361091822	0.0377828819685558	0.0456172213022809	0.0355928280184463	0.00774531275038727	0.00567989601695066	0.0227908053344729	0.010166835817175	0.00375692181685451	0.00144223065007211	0.00217224863344195	0.0460267435856347	0.00299129320014956	0.00425547068354611	0.00324056763349536	0.00137100938340188	0.000142442533340455	0	0.01173370368392	0.00336520485016826	0.00836849883375176	0.0413973612520699	0.0075672595837117	0.000391716966686252	0.0300909851681712	0.00393497498353008	0.0191763260509588	0	0.00316934636682513	0.00064099140003205	0.00365008991684917	0.00418424941687588	0.00381033776685718	0.00201200078343393	0.046293823335648	0.00249274433345797	0.00105051368338586	0.0012819828000641	0.00197639015009882	0.00696187881701476	0.000195858483343126	0	0	5.34159500026708e-05	0.0015312572334099	0.00258177091679576	0.00119295621672631	0.000142442533340455
M74J0F	0.164553863370111	0.343200853281111	0.0358448007553636	0.0618803657918204	0.0532950988791943	0.00374184749348674	0.0315783952020423	0.022521026035565	0.0131314367645259	0.0043888024339494	0.00547288909094088	0.0107359549579479	0.022398629154937	0.00674931370320505	0.00489587522512283	0.011312968823766	0.0107534402266091	0.00139882149289224	3.4970537322306e-05	0.00624224091203161	0.0122921438687905	0.00898742809183263	0.0332744662621741	0.00484341941913937	0.000839292895735343	0.0197058977811194	0.00283261352310678	0.0112954835551048	0	0.00195835009004913	0.000227308492594989	0.00162612998548723	0.00237799653791681	0.00239548180657796	0.00138133622423109	0.022398629154937	0.00125893934360301	0.000664440209123813	0.00127642461226417	0.00134636568690878	0.00767603294224616	0.000192337955272683	0	0	6.99410746446119e-05	0.000944204507702261	0.00290255459775139	0.00103163085100803	8.74263433057649e-05
M81J0F	0.153007955531374	0.327000279399438	0.0485566813228828	0.0880843492198874	0.0293663514844933	0.0211608311398027	0.00023528373748217	0.0328661970795406	0.00898489772510036	0.00174992279752364	0.000632325044483332	0.000338220372630619	0.0273517344823023	0.00402923400438216	0.00252930017793333	0.00129406055615193	0.000176462803111627	4.41157007779069e-05	0	0.0257194535535197	0.000176462803111627	0.00414687587312324	0.0129994264958899	0.00329397232475038	0.00486743231916239	0.0173227651721248	0.00377924503330735	0.0218666823522492	2.94104671852712e-05	0.00333808802552829	0.0026028263458965	0.00335279325912092	0.00242636354278488	0.0040439392379748	0.00438215961060541	0.0422334308780495	0.00145581812567093	0.00126465008896666	0.00151463906004147	0.00238224784200697	0.0197932444156875	0.000205873270296899	0	2.94104671852712e-05	0.000647030278075967	0.00161757569518992	0.00195579606782054	0.0019410908342279	0.000147052335926356
M82J0F	0.194549461575675	0.342369783734389	0.025747612477827	0.112809302825608	0.0225761946569673	0.00872587841106592	0.00437189801293652	0.0601494329074914	0.00394187525756571	0.00107505688842701	0.000770457436706026	0.00111089211804125	0.0191180949991937	0.00261597176183906	0.00177384386590457	0.00290265359875293	0.00177384386590457	8.95880740355844e-05	1.79176148071169e-05	0.022074501442368	0.0012721506513053	0.00381645195391589	0.00542903728655641	0.00200677285839709	0.0159645947931411	0.0143161742308864	0.00182759671032592	0.0112343444840623	0	0.00315350020605257	0.000680869362670441	0.00223970185088961	0.0039239576427586	0.000716704592284675	0.00206052570281844	0.0194585296805289	0.00109297450323413	0.00107505688842701	0.000609198903441974	0.00130798588091953	0.0135815520237946	0.00752539821898909	0	0.00395979287237283	0.000268764222106753	0.00109297450323413	0.00139757395495512	0.001379656340148	0.000268764222106753
M83J0F	0.17422228608377	0.457676557223939	0.0326460234212228	0.109102665421366	0.0529923126661398	0.0046986134061355	0.000689704720166679	0.0292549752137366	0.00844888282204181	0.00566132624470149	0.00442560528773619	0.000589122781809038	0.0114232344277606	0.00119261441195488	0.00244270421725699	0.000186795028378475	0.000431065450104174	5.74753933472232e-05	0	0.015317192327035	0.000675335871829873	0.00231338458222573	0.00364968747754867	0.000502909691788203	0.0059487032114376	0.00777354695021194	0.000819024355197931	0.00745743228680221	1.43688483368058e-05	0.00129319635031252	0.000100581938357641	0.000948343990229183	0.00106329477692363	0.000804655506861125	0.00113513901860766	0.00887994827214599	0.000244270421725699	0.000603491630145844	0.000488540843451397	0.000632229326819455	0.00719879301673971	0.00017242618004167	1.43688483368058e-05	0.000330483511746534	0.000229901573388893	0.000775917810187513	0.00224154034054171	0.000387958905093757	0.000488540843451397
M84J0F	0.111553982535062	0.443338184704948	0.0137602540354591	0.109949722148717	0.0297863191320455	0.00253043133103996	0.000711166975390315	0.00977441121989944	0.00319198200582165	0.00464739349034136	0.0593741730616565	0.000578856840433977	0.0119740672135486	0.00314236570521302	0.000496163006086266	0.000231542736173591	0.000611934374173062	6.61550674781688e-05	3.30775337390844e-05	0.0239812119608362	0.000810399576607568	0.00325813707329981	0.00674781688277322	0.00325813707329981	0.0175145541148452	0.0190195818999735	0.00185234188938873	0.00833553850224927	0	0.00244773749669225	0.0024311987298227	0.00145541148451971	0.00163733792008468	0.00135617888330246	0.00127348504895475	0.0227408044456205	0.000628473141042604	0.000165387668695422	0.000264620269912675	0.000628473141042604	0.0091293993119873	0.0200284466790156	0	0	0.000314236570521302	0.00102540354591162	0.00163733792008468	0.000463085472347182	0.000281159036782218
[truncated: 262 more columns]

## Sheet: Feces_T4_relative abundances
SampleID	Bacteria,Firmicutes,Bacilli,Lactobacillales,Streptococcaceae,Streptococcus	Bacteria,Firmicutes,Clostridia,Clostridiales,Peptostreptococcaceae,Romboutsia	Bacteria,Firmicutes,Bacilli,Lactobacillales,Lactobacillaceae,Lactobacillus	Bacteria,Firmicutes,Bacilli,Lactobacillales,Enterococcaceae,Enterococcus	Bacteria,Actinobacteria,Actinobacteria,Actinomycetales,Corynebacteriaceae,Corynebacterium	Bacteria,Firmicutes,Erysipelotrichia,Erysipelotrichales,Erysipelotrichaceae,Turicibacter	Bacteria,Actinobacteria,Actinobacteria,Actinomycetales,Dermabacteraceae,Brachybacterium	Bacteria,Proteobacteria,Gammaproteobacteria,Enterobacteriales,Enterobacteriaceae,Enterobacteriaceae_unclassified	Bacteria,Firmicutes,Clostridia,Clostridiales,Clostridiaceae_1,Clostridium_sensu_stricto	Bacteria,Firmicutes,Bacilli,Bacillales,Staphylococcaceae,Staphylococcus	Bacteria,Proteobacteria,Gammaproteobacteria,Pasteurellales,Pasteurellaceae,Gallibacterium	Bacteria,Actinobacteria,Actinobacteria,Actinomycetales,Micrococcaceae,Yaniella	Bacteria,Firmicutes,Clostridia,Clostridiales,Lachnospiraceae,Lachnospiraceae_unclassified	Bacteria,Firmicutes,Bacilli,Bacillales,Staphylococcaceae,Jeotgalicoccus	Bacteria,Firmicutes,Clostridia,Clostridiales,Peptostreptococcaceae,Terrisporobacter	Bacteria,Fusobacteria,Fusobacteriia,Fusobacteriales,Fusobacteriaceae,Fusobacterium	Bacteria,Actinobacteria,Actinobacteria,Actinomycetales,Brevibacteriaceae,Brevibacterium	Bacteria,Firmicutes,Bacilli,Bacillales,Staphylococcaceae,Salinicoccus	Bacteria,Firmicutes,Bacilli,Bacillales,Bacillaceae_1,Bacillus	Bacteria,Actinobacteria,Actinobacteria,Bifidobacteriales,Bifidobacteriaceae,Bifidobacterium	Bacteria,Actinobacteria,Actinobacteria,Actinomycetales,Dietziaceae,Dietzia	Bacteria,Actinobacteria,Actinobacteria,Coriobacteriales,Coriobacteriaceae,Olsenella	Bacteria,Bacteroidetes,Bacteroidia,Bacteroidales,Bacteroidaceae,Bacteroides	Bacteria,Firmicutes,Negativicutes,Selenomonadales,Acidaminococcaceae,Acidaminococcaceae_unclassified	Bacteria,Bacteroidetes,Bacteroidia,Bacteroidales,Bacteroidales_unclassified,Bacteroidales_unclassified	Bacteria,Proteobacteria,Gammaproteobacteria,Pseudomonadales,Moraxellaceae,Psychrobacter	Bacteria,Proteobacteria,Deltaproteobacteria,Desulfovibrionales,Desulfovibrionaceae,Desulfovibrio	Bacteria,Firmicutes,Clostridia,Clostridiales,Ruminococcaceae,Ruminococcaceae_unclassified	Bacteria,Proteobacteria,Gammaproteobacteria,Enterobacteriales,Enterobacteriaceae,Salmonella	Bacteria,Firmicutes,Clostridia,Clostridiales,Peptococcaceae_1,Peptococcus	Bacteria,Firmicutes,Bacilli,Lactobacillales,Aerococcaceae,Facklamia	Bacteria,Firmicutes,Clostridia,Clostridiales,Lachnospiraceae,Blautia	Bacteria,Actinobacteria,Actinobacteria,Coriobacteriales,Coriobacteriaceae,Collinsella	Archaea,Euryarchaeota,Methanobacteria,Methanobacteriales,Methanobacteriaceae,Methanobrevibacter	Bacteria,Actinobacteria,Actinobacteria,Bifidobacteriales,Bifidobacteriaceae,Aeriscardovia	Bacteria,Bacteroidetes,Bacteroidetes_unclassified,Bacteroidetes_unclassified,Bacteroidetes_unclassified,Bacteroidetes_unclassified	Bacteria,Firmicutes,Erysipelotrichia,Erysipelotrichales,Erysipelotrichaceae,Clostridium_XVIII	Bacteria,Firmicutes,Clostridia,Clostridiales,Ruminococcaceae,Pseudoflavonifractor	Bacteria,Firmicutes,Clostridia,Clostridiales,Ruminococcaceae,Faecalibacterium	Bacteria,Firmicutes,Erysipelotrichia,Erysipelotrichales,Erysipelotrichaceae,Erysipelotrichaceae_unclassified	Bacteria,Firmicutes,Negativicutes,Selenomonadales,Veillonellaceae,Veillonella	Bacteria,Firmicutes,Bacilli,Bacillales,Listeriaceae,Listeria	Bacteria,Proteobacteria,Gammaproteobacteria,Aeromonadales,Aeromonadaceae,Aeromonadaceae_unclassified	Bacteria,Bacteroidetes,Bacteroidia,Bacteroidales,Prevotellaceae,Prevotella	Bacteria,Firmicutes,Clostridia,Clostridiales,Ruminococcaceae,Intestinimonas	Bacteria,Firmicutes,Clostridia,Clostridiales,Ruminococcaceae,Butyricicoccus	Bacteria,Actinobacteria,Actinobacteria,Actinomycetales,Actinomycetaceae,Actinomyces	Bacteria,Firmicutes,Erysipelotrichia,Erysipelotrichales,Erysipelotrichaceae,Faecalitalea	Bacteria,Bacteroidetes,Bacteroidia,Bacteroidales,Porphyromonadaceae,Porphyromonadaceae_unclassified
48B14semF	0.0655241730796564	0.0706410282442283	0.182216897805032	0.049077138622104	0.0770777071615667	0.0505390972405531	0.0111677394464862	0.0029645271985218	0.0135231172206542	0.00341123677638125	0.00182744827306138	0.0133809823549717	0.0451582773254279	0.0191069869438973	0.00483258543320677	0.000345184673800483	0.00326910191069869	0.000426404597047656	2.03049808117931e-05	0.00125890881033117	0.00229446283173262	0.00919815630774229	0.00670064366789173	0.00615240918597332	0.0175231984405775	0.0350463968811549	0.00450770574021808	0.0157566651099515	0	0.002355377774168	0.00556356474243132	0.00619301914759691	0.00596966435866718	0.000791894251659932	0.000203049808117931	0.00934029117342484	0.00333001685313407	0.00131982375276655	0.00109646896383683	0.00304574712176897	4.06099616235863e-05	4.06099616235863e-05	0.0306605210258076	0.00164470344575524	0.00164470344575524	0.000609149424353794	0.000223354788929724	0.000934029117342484	0.00871083676825925
48B24semF	0.0732223333188425	0.181947282238549	0.134388268196902	0.0519642365488559	0.0825109768291093	0.175832137837094	0.00599921749337043	0.0091147531481401	0.0741352577200075	0.00723094089176774	0.00837571910910171	0.00686866930400383	0.0166500021736295	0.0214319871321132	0.0182439971597908	0.000739034039038386	0.0022026112536046	0.000376762451274471	7.2454317552783e-05	0.00236201075222072	0.0016374675766929	0.00236201075222072	0.00828877392803837	0.00252141025083685	0.0192583576055297	0.00575287281369097	0.00211566607254126	0.00618759871900767	0	0.00108681476329174	0.00411540523699807	0.0014345954875451	0.00155052239562956	0.000666579721485603	0.000347780724253358	0.00428929559912475	0.00108681476329174	0.000463707632337811	0.000608616267443377	0.00149255894158733	0.00059412540393282	0	7.2454317552783e-05	0.000999869582228405	0.000507180222869481	0.000463707632337811	0.000478198495848368	0.000420235041806141	0.00492689359358924
48B34semF	0.0381892225282617	0.0757363253856942	0.136703898342317	0.0400986836546748	0.0171006607073455	0.038273711958634	0.00231501039219994	0.00650568613866405	0.0139914496696463	0.00133493299988171	0.000844894303722604	0.00113215836698829	0.101894253028946	0.00343027087311377	0.00495108061981446	0.000101387316446713	0.000946281620169317	5.06936582233563e-05	0	0.000473140810084658	0.000675915442978083	0.0129606786191047	0.045489109312425	0.025380624883827	0.103634735294615	0.000456242924010206	0.0110343196066172	0.0475506514135082	0	0.00520454891093124	0.000456242924010206	0.0123861504925734	0.0097331823788844	0.0015884012909985	6.75915442978083e-05	0.0386285675661975	0.00751955930313118	0.00380202436675172	0.00375133070852836	0.00824616840433262	0.000118285202521165	0	0	0.0102739147332669	0.00413998208824076	0.00312610892377364	0.000253468291116781	0.00229811250612548	0.0223221075043512
48B44semF	0.0400184746495031	0.057971662271488	0.419732117582205	0.0326733115809234	0.0839404639520851	0.0195175732653943	0.0148542141569451	0.00146009326718217	0.0130961426719707	0.00871586287042417	0.0039482113857477	0.0107868114840805	0.0385434824714313	0.023272098809577	0.00493153950446222	0.00174317257408483	0.00463356128666994	0.000655552079143015	0	0.00144519435629256	0.00271160178190974	0.00560199049449485	0.00963959534558024	0.00944590950401526	0.040331351778185	0.000804541188039154	0.00519971990047528	0.0112188798998793	0	0.00390351465307886	0.00306917564326048	0.0039482113857477	0.00461866237578033	0.000566158613805331	0.00177297039586406	0.0101312594049375	0.00466335910844917	0.00199645405920827	0.00123660960383796	0.00211564534632518	0.000134090198006526	0	7.44945544480698e-05	0.00196665623742904	0.00116211504938989	0.00198155514831866	0.000700248811811857	0.000253281485123437	0.0122171069294835
48C14semF	0.163004032258065	0.135912298387097	0.16945564516129	0.129208669354839	0.118699596774194	0.045085685483871	0.0173891129032258	0.0112399193548387	0.0265877016129032	0.0116179435483871	0.000907258064516129	0.0118951612903226	0.00320060483870968	0.015851814516129	0.0212449596774194	0.00486391129032258	0.00370463709677419	0.00355342741935484	5.04032258064516e-05	0.0235131048387097	0.00362903225806452	0.000529233870967742	0.000100806451612903	5.04032258064516e-05	0.000403225806451613	0.00030241935483871	7.56048387096774e-05	0.000453629032258065	0	0.00047883064516129	0.00118447580645161	0.000100806451612903	0.000352822580645161	0.000252016129032258	0.00161290322580645	2.52016129032258e-05	7.56048387096774e-05	0	0	0	7.56048387096774e-05	0	0.000327620967741936	2.52016129032258e-05	0.000100806451612903	0	0.000176411290322581	0.000126008064516129	0.000100806451612903
48C24semF	0.13350929778255	0.13652157055727	0.142054012138565	0.135790870725779	0.0974365856931955	0.0550112587423016	0.0249332677194709	0.00563682727150718	0.0444533917893199	0.0158218881880135	0.0189534588944064	0.0133166316228992	0.00867892452914598	0.02071310338657	0.019564860794226	0.00465261933521228	0.00618858020549069	0.00429472554019595	7.45612072950685e-05	0.0136447009349975	0.00301227277472077	0.0041306908841468	0.00159560983611447	0.000432455002311397	0.00723243710762165	0.000387718277934356	0.000447367243770411	0.00399648071101567	4.47367243770411e-05	0.000671050865655617	0.00186403018237671	0.000864910004622795	0.000730699831491672	0.000193859138967178	0.00162543431903249	0.00252016880657332	0.000551752933983507	7.45612072950685e-05	0.000149122414590137	0.000462279485229425	0.000566665175442521	5.96489658360548e-05	0.000447367243770411	0.00028333258772126	0.000313157070639288	2.98244829180274e-05	0.000328069312098301	0.000328069312098301	0.00052192845106548
48C34semF	0.0672847094174691	0.0612237929386055	0.167349586833299	0.0463361333060165	0.0627603633135286	0.0350850235607457	0.0518507136515741	0.00450727309977464	0.0226729495321997	0.0385508434064058	0.00128047531243598	0.0331557740900089	0.0556238475722188	0.0208632110906235	0.0103633135286485	0.000529263129140203	0.0149218056409206	0.00853650208290651	5.1219012497439e-05	0.00862186710373557	0.0057706754080448	0.0353581916273988	0.00670969063716452	0.00517312026224134	0.0489483029433859	5.1219012497439e-05	0.00457556511643789	0.0353923376357304	0	0.00471214914976439	0.00150242436659155	0.00606091647886362	0.00718773475380728	0.000751212183295773	0.00112681827494366	0.0167827630949942	0.00320972478317285	0.00056340913747183	0.00105852625828041	0.00194632247490268	0.000119511029160691	1.7073004165813e-05	1.7073004165813e-05	0.00160486239158642	0.00254387762070614	0.000853650208290651	0.000221949054155569	0.00218534453322407	0.00349996585399167
48C44semF	0.210442994028607	0.0936258852937092	0.236425496458825	0.13593945285377	0.0653659213998056	0.036647687821136	0.0360644354950701	0.0116511595611721	0.0109706985140953	0.0232606582419108	0.00365227051798361	0.0251770587418414	0.00186085265935287	0.0111928898764061	0.00748507151784474	0.00511040133314817	0.0106096375503402	0.00511040133314817	5.55478405776975e-05	0.00254131370642966	0.00565199277878072	0.000583252326065824	0.000124982641299819	0.000208304402166366	0.000652687126787946	0.000152756561588668	0.00022219136231079	0.00104152201083183	0	0.00022219136231079	0.00138869601444244	0.000208304402166366	0.000208304402166366	0.000180530481877517	0.00277739202888488	0.000277739202888488	5.55478405776975e-05	1.38869601444244e-05	0	1.38869601444244e-05	0.000333287043466185	0	1.38869601444244e-05	4.16608804332732e-05	0.000111095681155395	1.38869601444244e-05	0.0005693653659214	8.33217608665463e-05	5.55478405776975e-05
48D14semF	0.00102077189798762	0.130140315629152	0.215285654104151	0.0505201075861175	0.0564827116886484	0.000226838199552805	0.00923555526750705	0.0141935902005898	0.0104831653650475	0.01166596454843	0.00077773096989533	0.00745325512816358	0.100035646002787	0.0121844518616935	0.000550892770342526	0.00805275608412457	0.002900288408568	0.00246281473800188	0.000226838199552805	0.00145824556855374	0.00121520464046145	0.0143394147574452	0.0355163809585534	0.0109368417641531	0.0174827440941054	0.000810136426974303	0.0104183544508895	0.0533555850805276	0	0.0100780971515603	0.00252762565215982	0.00889529796817784	0.00978644803784957	0.0019767328818173	1.6202728539486e-05	0.00661071324411031	0.00706438964321592	0.00938137982436242	0.0068537541722026	0.00756667422793999	0	0	9.72163712369163e-05	0.00121520464046145	0.00317573479373927	0.00349978936452899	0.000810136426974303	0.00179850286788295	0.0148903075277877
48D24semF	0.00156567835788695	0.0573260186155458	0.143339702890957	0.0466621463354497	0.0569685015102016	0.00046847068976145	0.0140171361647044	0.0141897306293534	0.00774209455711028	0.00498058312272699	0.00218208716020465	0.00756950009246132	0.114541083646674	0.00806262713431548	0.000431486161622388	0.0116254700117118	0.00335326388460827	0.00261357332182704	2.46563520927079e-05	0.000184922640695309	0.0020341490476484	0.0126117240954201	0.088331381372126	0.0203168341243913	0.00618874437526968	0.000147938112556247	0.0121432534056586	0.0767922085927387	1.23281760463539e-05	0.00609011896689885	0.00108487949207915	0.00877766134500401	0.00801331443013006	0.00213277445601923	1.23281760463539e-05	0.00707637305060716	0.00290944954693953	0.0128829439684399	0.00817358071873266	0.0101830734142884	0	0	8.62972323244776e-05	0.00989952536522221	0.00330395118042286	0.00244097885717808	0.000246563520927079	0.00218208716020465	0.0256919188806016
48D34semF	0.00359621357347718	0.141768088805671	0.347257515640557	0.0629634583091852	0.0722214792028889	0.00202101258674751	0.0156777079339604	0.0468250783885397	0.0881963948701945	0.0376413594281723	0.000876762813368404	0.0109075238137696	0.0307758607878977	0.0189321326140906	0.0103131083470792	0.0172826296940246	0.00916885857370009	0.00277889230677782	1.48603866672611e-05	0.00142659712005706	0.000980785520039231	0.00156034060006241	0.00441353484017654	0.000802460880032098	0.00500795030686698	0.00386370053348788	0.000163464253339872	0.0069100798002764	0	0.000772740106697576	0.00205073336008203	0.00104022706670828	0.00170894446673502	0.000936204360037448	2.97207733345222e-05	0.000371509666681527	0.00246682418676534	0.00068357778669401	0.000609275853357704	0.00222905800008916	0	0	0.000653857013359488	0.000564694693355921	0.000356649280014266	0.000371509666681527	0.000371509666681527	0.000802460880032098	0.000386370053348788
48D44semF	0.00270940550769098	0.155640294164027	0.195994667201858	0.0725518585948364	0.0488696474905744	0.000114683831013375	0.00276674742319767	0.0547615293088866	0.0107086027208739	0.0190518514270969	0.0017345929440773	0.00232234757802084	0.0683945697206015	0.0301045056410109	0.000372722450793469	0.00943274510085009	0.00111816735238041	0.00246570236678756	0.000415728887423484	0.00129019309890047	0.000315380535286781	0.0105652479321072	0.0588901472253681	0.00378456642344137	0.0187651418495635	0.000444399845176828	0.00399959860659145	0.0406554180942414	0	0.00528979170549192	0.0140057628625084	0.00610691400146222	0.00425763722637155	0.00713906848058259	2.86709577533438e-05	0.00609257852258555	0.00665166219877575	0.00460168871941167	0.00778416503003283	0.00425763722637155	0	0	0	0.00272374098656766	0.00172025746520062	0.00180627033846066	0.000415728887423484	0.00329716014163453	0.00693837177630919
714semF	0.0213830856887499	0.0912523740364205	0.207373477823707	0.0250027929840241	0.0951178639258183	0.0675008378952072	0.0654898893978327	0.00140766394816222	0.00361970729527427	0.123628644844151	0.00837895207239415	0.0271031169701709	0.0413585074293375	0.0271924924589431	0.00221204334711205	0.000893754887722042	0.0286671880236845	0.00811082560607753	0	0.0010501619930734	0.00699363199642498	0.00180985364763714	0.00871411015528991	0.00239079432465646	0.00741816556809295	0.000111719360965255	0.00227907496369121	0.0178750977544408	0	0.00178750977544408	0.0043347112054519	0.00703831974081108	0.0031057982348341	0.00286001564071054	0.000536252932633225	0.00393252150597699	0.00379845827281868	0.000983130376494246	0.000558596804826276	0.00292704725728969	4.46877443861021e-05	0	0.00111719360965255	0.00120656909842476	0.00062562842140543	0.00120656909842476	0.000335158082895766	0.0010501619930734	0.00167579041447883
724semF	0.00124821945166454	0.0616179861080517	0.377549671791709	0.00656416582228292	0.0627046712777362	0.034568336343745	0.063394863209833	0.00418520639675757	0.00143912360309558	0.0234518407565678	0.00951583770210141	0.0660822062645932	0.061089328457935	0.0150226882241508	0.000983890626606165	0.0221595665007269	0.0361543092940952	0.0558614916956694	0.000102794543078256	0.00212931553519245	0.0155366609395421	0.00337753498685698	0.00672570010426304	0.000792986475175118	0.00524252169699106	0	0.00054334258484221	0.00613830271524443	0	0.000690191932096862	0.0009692056918807	0.00173282229760489	0.000719561801547792	0.000469917911214885	0.000425863107038489	0.00152723321144838	0.00346564459520977	0.000572712454293141	0.000396493237587559	0.00233490462134896	1.46849347254651e-05	0	5.87397389018606e-05	0.00165939762397756	0.000308383629234768	0.000499287780665815	0.00129227425584093	0	0.000851726214076978
734semF	0.00886062967900728	0.123125833247872	0.597969439031894	0.0134140088196082	0.00799917957132602	0.0625166649574403	0.000451235770690186	0.0111578299661573	0.00291252179263665	0.00198953953440673	0.0251666495744026	0.000184596451645985	0.0243462209004205	6.15321505486617e-05	0.00131268587837145	0.0259870782483848	0.000492257204389293	2.05107168495539e-05	4.10214336991078e-05	0.0039585683519639	0.000492257204389293	0.00139472874576966	0.010480976310122	0.00123064301097323	0.00514818992923803	0	0.00188698595015896	0.00734283663214029	2.05107168495539e-05	0.000635832222336171	0	0.00188698595015896	0.00151779304686699	0.000287150035893755	0.00151779304686699	0.00194851810070762	0.00278945749153933	0.000676853656035278	0.00121013229412368	0.00198953953440673	4.10214336991078e-05	0	0	0.00114860014357502	0.000143575017946877	0.000717875089734386	0.00461491129114963	0.000328171469592862	0.000717875089734386
744semF	0.0244704033151145	0.168184903368699	0.28853641981924	0.0438859714928732	0.0227021040974529	0.186457328617869	0.00335798235273104	0.00132175901118137	0.00780552280927375	0.0103418711820812	0.00650162540635159	0.00103597327903404	0.0723573750580502	0.00182188404243918	0.00425106276569142	0.00251848676454828	0.00153609831029186	0.000178616082592077	0	0.00219697781588254	0.000482263422998607	0.00291144214625085	0.00564426820990962	0.002322009073697	0.0133426213696281	0	0.00342942878576787	0.0185939341978352	0	0.00301861179580609	7.14464330368306e-05	0.00364376808487836	0.00242917872325224	0.00110741971207087	0.000196477690851284	0.00453684849783875	0.00737684421105276	0.00269710284714036	0.00141106705247741	0.00623370128246347	3.57232165184153e-05	0	5.3584824777623e-05	0.00639445575679634	0.000946665237738006	0.00130389740292216	0.00323295109491659	0.00169685278462473	0.00155395991855107
HB314semF	0.000447677672076105	0.0337772803581421	0.266547285954113	0.00145495243424734	0.00687185226636822	0.0132288752098489	0.0614213766088416	0.000335758254057079	0.00496922216004477	0.0649132624510353	0.00299944040290991	0.04758813654169	0.0692109681029659	0.00158925573587017	0.00606603245663123	0.00416340235030778	0.0216452154448797	0.0165416899832121	0	0.000984890878567431	0.0154896474538332	0.00635702294348069	0.0815892557358702	0.0105651930609961	0.0240626748740907	0	0.00973698936765529	0.0322551762730834	0	0.00331281477336318	4.47677672076105e-05	0.01011751538892	0.00532736429770565	0.00284275321768327	0.00223838836038053	0.0288304420817012	0.00429770565193061	0.00360380526021265	0.00541689983212087	0.00794627867935087	0	0	0	0.00548405148293229	0.00149972020145495	0.00526021264689424	0.000134303301622832	0.00223838836038053	0.0154672635702294
HB324semF	0.000597398330271667	0.0705527428050839	0.349896202040115	0.0103349911136998	0.00333049569126454	0.0244783965828816	0.0453724031841331	0.00120973161880013	0.00467464193437579	0.000104544707797542	0.00557073942978329	0.0152037875054139	0.0998700658631659	0.000462983705960542	0.0113356333169049	0.00403243872933375	0.00888630016279104	0.0144271696760608	0	0.00527204026464746	0.00421165822841525	0.0131726331824903	0.039069850799767	0.009677852950401	0.0354705258598802	0	0.00899084487058859	0.0323192496676972	1.49349582567917e-05	0.00542138984721538	2.98699165135833e-05	0.00846812133160088	0.00642203205042042	0.00188180474035575	0.00177726003255821	0.0133817225980853	0.00722851979628717	0.00434607285272638	0.0143823648012904	0.00563047926281046	0.000209089415595083	0	0	0.0096927879086578	0.001792194990815	0.00422659318667204	0.00206102423943725	0.00112012186925938	0.00606359305225742
HB334semF	0.00253301972136783	0.0817525156226079	0.541217241235334	0.0126790162976159	0.00452324950244255	0.015198118328207	0.0302709774394233	0.00201806516262822	0.0148919291311186	0.0199858039554077	0.0195126024689983	0.0409180108836342	0.0283503361122323	0.000570625321846599	0.016840405839863	0.0236183212481385	0.0124145801728577	0.00270003201068879	1.39176907767463e-05	0.00194847670874449	0.0129573701131508	0.00180929980097702	0.00929701743886654	0.00169795827476305	0.00683358617138244	0	0.00237992512282362	0.00740421149322904	0	0.00146135753155836	1.39176907767463e-05	0.00229641897816314	0.0018928059456375	0.000932485282042004	0.00164228751165607	0.00514954558739614	0.00215724207039568	0.000431448414079136	0.0011412506436932	0.0140011969214068	0.000139176907767463	0	0.000208765361651195	0.00167012289320956	0.000375777650972151	0.00347942269418658	0.000751555301944301	0.000487119177186121	0.00222683052427941
HB344semF	0.00278047324027767	0.0291296558931104	0.139844741360006	0.00733373143241024	0.0388706426811973	0.00882660297081436	0.163618720609092	0.000279913413450773	0.00220198551914608	0.147495707994327	0.000933044711502575	0.107244159140106	0.0297641262969321	0.0201164439799955	0.00632604314398746	0.00143688885571397	0.0590244084496529	0.0165335522878256	0	0.000765096663432112	0.0226356647010525	0.00322833470179891	0.0136597745763977	0.00266850787489737	0.00793088004777189	0	0.00326565649025901	0.0182690154512204	0	0.00179144584608494	0.00110099275957304	0.0061954168843771	0.00264984698066731	0.00147421064417407	0.00117563633649324	0.00699783533626931	0.00199671568261551	0.00134358438456371	0.00182876763454505	0.00347092632678958	0	0	0.00666193924012839	0.00292976039411809	0.000783757557662163	0.00216466373068597	0.000186608942300515	0.00141822796148391	0.00223930730760618
LAND114semF	0.19564343836855	0.0720289321233634	0.36777952650437	0.0795465961222918	0.0144325754277869	0.0245789103572983	0.0274754713190235	0.0432307537755751	0.0568094297290962	0.00825436158456953	0.0214144593644309	0.0128922077487192	0.000937615108997756	0.00331513913538492	0.00730000334862539	6.6972507785554e-05	0.0124066570672739	0.00472156179888156	0	0.000485550681445267	0.00606101195459264	0.000385091919766936	0.000100458761678331	6.6972507785554e-05	0.000401835046713324	0.000468807554498878	0.00011720188862472	0.000217660650303051	0	3.3486253892777e-05	0.000385091919766936	0.000150688142517497	0.000150688142517497	3.3486253892777e-05	0.00234403777249439	0.000150688142517497	3.3486253892777e-05	5.02293808391655e-05	0	5.02293808391655e-05	0.000150688142517497	0	0.000502293808391655	1.67431269463885e-05	0	3.3486253892777e-05	0.00110504637846164	8.37156347319425e-05	0.00011720188862472
LAND124semF	0.244829630662993	0.190527674118509	0.144613399365257	0.132319603808461	0.0221113939943501	0.0925435078296655	0.00756809542077913	0.0180134621420849	0.0495588184005859	0.00777735151536289	0.0124681756356154	0.0071670212394936	0.00111603250444669	0.00186586684337181	0.0228437903253932	0.00127297457538451	0.00252851114288704	0.00149966867785024	1.74380078819796e-05	0.000470826212813448	0.00620793080598472	0.000156942070937816	1.74380078819796e-05	1.74380078819796e-05	0	0	3.48760157639591e-05	5.23140236459387e-05	3.48760157639591e-05	0	0.000209256094583755	1.74380078819796e-05	0.000122066055173857	0	0.000540578244341366	1.74380078819796e-05	1.74380078819796e-05	0	0	6.97520315279182e-05	3.48760157639591e-05	1.74380078819796e-05	0	0	0	0	0.000209256094583755	3.48760157639591e-05	0
LAND134semF	0.073641552334844	0.111197042582481	0.242270034492893	0.107948832964687	0.0248256020788542	0.0221032930658458	0.0453511933303429	0.0132867241032621	0.0472073131119395	0.0328533201342593	0.0592411563626239	0.0377256345609503	0.0144622666316066	0.00759462343969931	0.0204173175975623	0.00793491206632535	0.0210205565265812	0.014957231906699	4.64029945399143e-05	0.0135342067408083	0.0187932127886653	0.000680577253252077	0.00133021917681088	0.0003248209617794	0.0003248209617794	9.28059890798286e-05	0.000108273653926467	0.00163957247374364	1.54676648466381e-05	0.00024748263754621	0.000371223956319314	0.00024748263754621	0.000634174258712162	6.18706593865524e-05	0.00216547307852933	0.000340288626626038	0.0025985676942352	7.73383242331905e-05	6.18706593865524e-05	0.00825973302810475	0.0027996473372415	0	0	0.000108273653926467	0.000170144313313019	0.000711512582945353	0.000139208983619743	0.000170144313313019	0.000123741318773105
LAND414semF	0.138086525578782	0.0717877054730382	0.201302349703946	0.131070548744471	0.050710961923559	0.0150260037745091	0.0541685275092562	0.0549032601962168	0.056934579977814	0.00292452422456888	0.0168268191837264	0.0163081843458718	0.000533041361128319	0.0117413164680968	0.0146658406926656	0.0082261247893046	0.0284528834656332	0.0220275740855459	0	0.00190166107213346	0.0211055565960267	4.3219569821215e-05	1.44065232737383e-05	0	2.88130465474767e-05	0.00388976128390935	1.44065232737383e-05	0.000115252186189907	0	4.3219569821215e-05	0.000475415268033365	0.00017287827928486	0.000201691325832337	8.64391396424301e-05	0.00181522193249103	0.00126777404808897	0	1.44065232737383e-05	0	0.000115252186189907	0.000633887024044487	0	0.00207453935141832	0	0	0	0.000201691325832337	2.88130465474767e-05	4.3219569821215e-05
LAND424semF	0.129092026095351	0.101251133626532	0.252216057027509	0.114074521926531	0.054160531268589	0.0117214545525466	0.0171433586550557	0.0306201059026593	0.0374657474133812	0.00294499107726213	0.0436385267243313	0.0116434415438774	0.00547066223292734	0.00574370776326953	0.0159146537685159	0.0756726184091197	0.0127746301695808	0.00866919558836436	9.75162608364945e-06	0.00334480774669176	0.0165582610900368	0.000146274391254742	2.92548782509483e-05	9.75162608364945e-06	2.92548782509483e-05	0.000243790652091236	0	8.7764634752845e-05	0	5.85097565018967e-05	0.000234039026007587	6.82613825855461e-05	0.000136522765171092	4.87581304182472e-05	0.00165777643422041	0.000302300408593133	1.95032521672989e-05	0	0	1.95032521672989e-05	0.00244765814699601	0	0.000146274391254742	9.75162608364945e-06	0	0	0.000234039026007587	8.7764634752845e-05	1.95032521672989e-05
LAND434semF	0.162905582784797	0.108784771166604	0.127730288256366	0.212008742095258	0.0379168983666766	0.0196438501428996	0.0205749608804169	0.0189972454640682	0.0388350770106172	0.00262521499605571	0.0810583625383113	0.0114836990960467	0.00730663287079545	0.00597462723240265	0.0111862609437842	0.0251529220065436	0.0139278647820296	0.0116130200318129	0	0.00219845590802695	0.0116776804996961	0.000556080023795052	0.000129320935766291	0.000116388842189662	0.000336234432992357	0.000762993521021118	7.75925614597747e-05	0.00058194421094831	0	0.000129320935766291	0.000556080023795052	0.000181049310072808	0.000400894900875503	0	0.000426759088028761	0.00566425698656356	0	1.29320935766291e-05	0.000116388842189662	0.00014225302934292	0.00258641871532582	0	0.000400894900875503	6.46604678831456e-05	5.17283743065165e-05	3.87962807298874e-05	0.000206913497226066	3.87962807298874e-05	0.000219845590802695
LI114semF	0.259290316885868	0.105084296937064	0.210521670050313	0.0972283520169477	0.0548297878600641	0.0423691411422014	0.00197134198369965	0.0524171006561332	0.0163150616412158	0.00211845705711007	0.0066643128254921	0.00200076499838173	0.00647306323005855	0.00687027392826669	0.0099449789625445	0.0035601847765322	0.000426633712890223	0.000117692058728337	0	0.000426633712890223	0.000632594815664813	0.000117692058728337	0.00185364992497131	0.00120634360196546	0.00283932091682114	0.0103421896607526	0.000220672610115632	0.00239797569658987	0	0.00020596110277459	0.00180951540294819	0.000456056727572307	0.000279518639479801	0.000529614264277518	1.47115073410422e-05	0.00141230470474005	0.000250095624797717	0.000308941654161885	0.000485479742254391	0.000529614264277518	0.000279518639479801	0	0.020581398770118	0.000411922205549181	0.000161826580751464	0.000235384117456675	0.000147115073410422	0.000367787683526054	0.00100038249919087
LI124semF	0.272347950177605	0.0998154151607749	0.221222603111573	0.132047961035536	0.0204284229629745	0.0576556174285315	0.000480851261846779	0.0637825931843211	0.0400967907056104	0.000604941910065303	0.0362344692798089	0.00051187392390141	0.011850656904869	0.000651475903147249	0.00952395725077169	0.0015045991096496	0.000139601979245839	6.20453241092618e-05	0	0.00299368688827188	0.000604941910065303	0.000108579317191208	0.000124090648218524	0.000124090648218524	0.000155113310273155	6.20453241092618e-05	1.55113310273155e-05	0.00119437248910329	0	4.65339930819464e-05	9.30679861638927e-05	3.10226620546309e-05	3.10226620546309e-05	0.000217158634382416	0	6.20453241092618e-05	0.000325737951573625	0	1.55113310273155e-05	0.00034124928260094	0.00120988382013061	0	0	7.75566551365773e-05	7.75566551365773e-05	1.55113310273155e-05	0.00017062464130047	6.20453241092618e-05	3.10226620546309e-05
LI134semF	0.305884475350149	0.118542329517499	0.221471446846197	0.117886312198642	0.0257486797651458	0.0546462426608062	0.00132843507068587	0.0481352707711484	0.0138091645619444	0.00152524026634303	0.0377537967002329	0.00100042641125726	0.00457572079902909	0.00141043723554302	0.00823301735165808	0.000196805195657165	0.000574015154000066	0.000213205628628596	0	0.00036080952537147	0.000590415586971496	0.000114803030800013	0.000869222947485814	0.000229606061600026	0.000574015154000066	3.28008659428609e-05	0.000131203463771444	0.00109882900908584	1.64004329714304e-05	0.000131203463771444	0.000180404762685735	0.000213205628628596	0.000328008659428609	0.000344409092400039	0	0.000344409092400039	0.000311608226457178	3.28008659428609e-05	3.28008659428609e-05	0.000442811690228622	0.000442811690228622	3.28008659428609e-05	0	3.28008659428609e-05	4.92012989142913e-05	3.28008659428609e-05	0.000131203463771444	0.000196805195657165	4.92012989142913e-05
LI144semF	0.222008069282759	0.125330866291471	0.284750597486701	0.0799347261840516	0.0610849844524966	0.043648652121399	0.00642458818389741	0.0478888803227713	0.0292575745894688	0.00727263382417187	0.0172178963328451	0.00375195949939609	0.00836481381543443	0.00616760465654152	0.0128620255441626	0.00233855009893866	0.00244134350988102	0.000873743993010048	0	0.000205586821884717	0.0014776552822964	8.99442345745638e-05	0.000578212936550767	7.70950582067689e-05	0.000899442345745638	0	0.000115642587310153	0.00136201269498625	2.56983527355896e-05	0.00037262611466605	0.000359776938298255	0.000411173643769434	0.000616760465654152	0.000822347287538869	0	0.000231285174620307	0.000154190116413538	0.000141340940045743	0.000205586821884717	0.00037262611466605	0.00138771104772184	0	0	0.000167039292781333	0.000102793410942359	0.000102793410942359	0.00071955387659651	0.000128491763677948	7.70950582067689e-05
LI214semF	0.238841177467654	0.0687891971297813	0.36544437538844	0.104822306344991	0.0198598790892141	0.0168653596248376	0.00177976156845019	0.0649189219729928	0.0231510254816656	0.00316402056613368	0.00492965704277078	0.00114413243686084	0.0124865811627776	0.00104525679416916	0.00627154076501497	0.00348889767783491	0.00035312729532742	0	0	0.00314989547432058	0.000946381151477485	0.00161026046669303	0.00161026046669303	0.000437877846206	0.00372902423865755	4.23752754392904e-05	0.000494378213458387	0.00519803378721962	0	0.00113000734504774	5.65003672523871e-05	0.00111588225323465	0.000946381151477485	0.00120063280411323	0.000875755692412001	0.00158201028306684	0.000819255325159613	0.000607378947963162	0.000240126560822645	0.00039550257076671	0.000310752019888129	0	2.82501836261936e-05	0.000635629131589355	0.000409627662579807	0.000367252387140516	8.47505508785807e-05	0.000621504039776259	0.000466128029832194
LI224semF	0.121196888724271	0.041443991745595	0.240277263347267	0.0324488068151754	0.0162839303666861	0.0181623366315678	0.00068786708291444	0.0137573416582888	0.0149478808402561	0.00093920313244087	0.00030424890205831	0.00044975924652098	0.0920286787660723	0.00048944388591989	0.00205037303561035	0.00796338430604794	0.00010582570506376	2.645642626594e-05	0	0.00101857241123869	0.00067463886978147	0.011455632573152	0.0302000105825705	0.0116540557701466	0.0450288375046299	2.645642626594e-05	0.0063495423038256	0.0478464469019525	0	0.00795015609291497	5.291285253188e-05	0.00670670405841579	0.00743425578072914	0.0142335573310757	9.259749193079e-05	0.0352135033599661	0.00560876236837928	0.00816180750304249	0.00453727710460871	0.0055558495158474	0.00017196677072861	0	0	0.0140086777078152	0.00281760939732261	0.00260595798719509	6.614106566485e-05	0.00284406582358855	0.00949785702947246
LI234semF	0.198788337750852	0.0615788071297348	0.306968460319464	0.0802866478746827	0.0570911691699272	0.0249204145455565	0.00280477372487975	0.0229430490695163	0.0313152986382824	0.00567966679288148	0.00238405766614778	0.00260843956413816	0.0340639768886645	0.00674548080833579	0.0066332898593406	0.00607233511436465	0.00141641073106427	9.81670803707911e-05	0	0.00450166182843199	0.000434739927356361	0.00461385277742718	0.0175438596491228	0.00267855890726016	0.0124391714698417	0	0.00166884036630345	0.012733672710954	0	0.00228589058577699	0.00065912182534674	0.0021736996367818	0.00452970956568079	0.00286086919937734	0.000476811533229557	0.0126495294992077	0.00229991445440139	0.0021877235054062	0.00126214817619589	0.00157067328593266	0.000238405766614778	0	0	0.00249624861514297	0.0011078856213275	0.00190724613291823	0.0011359333585763	0.00161274489180585	0.00144445846831307
LI244semF	0.209410602130308	0.0759480440504357	0.334967646304267	0.0853738490921011	0.0341685432760374	0.0152409186359188	0.000522600077914921	0.0410668643045143	0.0386819075853026	0.00272702222475604	0.00422830972131163	0.00169132388852465	0.0270231749380006	0.00297406953431582	0.00894121224214437	0.0135590965669926	0.000247047309559781	2.85054587953593e-05	9.5018195984531e-06	0.00561557538268578	0.00015202911357525	0.00580561177465485	0.00606216090381308	0.00163431297093393	0.00879868494816757	0	0.00151078931615404	0.0101384415115495	0	0.00197637847647825	0.000636621913096358	0.00213790940965195	0.00276502950314985	0.00381973147857815	0.000864665583459232	0.00516898986155849	0.00181484754330454	0.00101669469703448	0.000864665583459232	0.00157730205334322	0.000893171042254592	0	0	0.00231844398202256	0.000940680140246857	0.000731640109080889	9.5018195984531e-05	0.000788651026671608	0.0012352365477989
M2214semF	0.128624449083739	0.04595221526328	0.200719090698214	0.117861285084667	0.0330549756437022	0.0147297610763164	0.0759220598469033	0.0253073532823011	0.0328926003247506	0.00719090698213871	0.0142658315935978	0.0277197865924379	0.020598469032707	0.00818835536998376	0.00800278357689631	0.00069589422407794	0.0343075852470425	0.012154952447228	0	0.000927858965437254	0.0174437485502204	0.0034794711203897	0.0319879378334493	0.00336348874971004	0.0178844815588031	0.0026675945256321	0.00282996984458362	0.00962653676641151	0	0.00129900255161215	0.000835073068893528	0.00173973556019485	0.00167014613778706	0.0019253073532823	0.000533518905126421	0.0089538390164695	0.00120621665506843	0.000951055439573185	0.000579911853398283	0.00146137787056367	0.000139178844815588	0	2.31964741359313e-05	0.000510322430990489	0.00102064486198098	0.00113662723266064	0.000208768267223382	0.000463929482718627	0.00693574576664347
M2224semF	0.180395569620253	0.0689715189873418	0.198037974683544	0.0980063291139241	0.0252056962025316	0.0155221518987342	0.11246835443038	0.0289556962025316	0.0128322784810127	0.0135126582278481	0.0102056962025316	0.037120253164557	0.00368670886075949	0.0176740506329114	0.00738924050632911	0.000142405063291139	0.0468829113924051	0.0177848101265823	0	0.000443037974683544	0.0177056962025316	0.00185126582278481	0.000443037974683544	3.16455696202532e-05	0.000316455696202532	0.00397151898734177	0.000237341772151899	0.00213607594936709	0	0.000506329113924051	0.00183544303797468	0.000537974683544304	0.000901898734177215	0.00118670886075949	0.00232594936708861	0.000427215189873418	0.000205696202531646	3.16455696202532e-05	7.91139240506329e-05	0.000110759493670886	0.00229430379746835	0	1.58227848101266e-05	4.74683544303797e-05	0.000126582278481013	0.000158227848101266	3.16455696202532e-05	0.000126582278481013	0.000189873417721519
M2234semF	0.243402591670082	0.0858845414131223	0.214396065201627	0.165116499038371	0.0175142667969858	0.0248447204968944	0.0362581580855693	0.0306933190402623	0.0409559542201343	0.00874925119021345	0.00575401204401425	0.0146136141501403	0.00397263297285367	0.00264842198190245	0.011098149257496	0.00277453731437399	0.0137308068228395	0.000756691994829271	0	0.00394110413973579	0.0121228363338273	0.00100892265977236	0.000441403663650408	4.72932496768295e-05	0.000504461329886181	0.000141879749030488	9.45864993536589e-05	0.0017183214049248	0	0.000567518996121954	0.000236466248384147	0.000567518996121954	0.000409874830532522	0.00203360973610367	0.00182867232083741	0.000535990163004067	0.000362581580855693	1.57644165589432e-05	9.45864993536589e-05	0.000189172998707318	0.00055175457956301	0	9.45864993536589e-05	1.57644165589432e-05	0.000220701831825204	7.88220827947158e-05	9.45864993536589e-05	7.88220827947158e-05	0.000189172998707318
M2244semF	0.106483837664132	0.0572334268805165	0.158831484201189	0.0793648485553504	0.0236291460063108	0.0117055154062032	0.147082345756205	0.0192813831411496	0.0180599380552849	0.00900088700178854	0.00299544866295386	0.0505300199211877	0.0052638466795597	0.021709732299952	0.0106003984237542	0.00152680635733085	0.101263614023353	0.0530746971834058	1.45410129269605e-05	0.00341713803783572	0.028325893181719	0.000552558491224499	0.000159951142196565	5.8164051707842e-05	0.000145410129269605	0.00799755710982827	8.7246077561763e-05	0.000668886594640183	1.45410129269605e-05	0.000101787090488723	0.000610722542932341	0.000130869116342644	0.000378066336100973	0.00175946256416222	0.00273371043026857	0.000130869116342644	0.00029082025853921	0	0	0.000189033168050486	0.000479853426589696	0	7.27050646348025e-05	0	2.9082025853921e-05	2.9082025853921e-05	0.00030536127146617	0.000116328103415684	4.36230387808815e-05
M714semF	0.0949368459821912	0.0581060294213229	0.123881534761791	0.0606841865805837	0.0506098749918756	0.0256515804753342	0.0330394089737201	0.00268648309032216	0.0267565049721602	0.0302229347661243	0.00641289511883355	0.0237450440886539	0.0662521394371385	0.0174404749008818	0.00537296618064432	0.00112658968303833	0.012110839092662	0.00446302835972875	0	0.00249149641441168	0.00474467578048833	0.0154472777693524	0.0654505275472843	0.0117641961132656	0.0301796043936998	0.00158155859349611	0.00604458695322486	0.0274714561171653	0	0.00515631431852157	0.000541629655306887	0.0054812921117057	0.0086660744849102	0.00255649197304851	0.000454968910457785	0.0273197998136794	0.00413805056654462	0.00240483566956258	0.00153822822107156	0.00591459583595121	0.000151656303485928	0	0	8.6660744849102e-05	0.00151656303485928	0.00162488896592066	0.000108325931061377	0.00366141646987456	0.0325411096908378
M724semF	0.275055164303741	0.152306330351598	0.155781351162084	0.146492607322648	0.00807314720610969	0.0271923681672238	0.00654043840756841	0.00684433756589987	0.0988332914921449	0.00348823381736982	0.0177847072658325	0.00302577857643064	0.0114688899752917	0.00233870221846386	0.0250518610520196	0.00344859479671789	0.00192909900506058	0.000515307268475087	6.60650344198829e-05	0.00336931675541403	0.000977762509414267	0.00128166166774573	0.00469061744381169	0.000528520275359063	0.00233870221846386	0.000303899158331461	0.000330325172099415	0.00161198683984514	0	0.000383177199635321	0.000422816220287251	0.000251047130795555	0.000422816220287251	0.000422816220287251	0.0010174015300662	0.00155913481230924	0.000132130068839766	9.24910481878361e-05	0.000145343075723742	0.000184982096375672	0.00141379173658549	0	1.32130068839766e-05	0	0.000132130068839766	0.000132130068839766	0.000356751185867368	0.000132130068839766	0.00145343075723742
M734semF	0.221866383272059	0.113597196691176	0.292466107536765	0.156623391544118	0.0256060431985294	0.0196030560661765	0.0152516084558824	0.00697954963235294	0.0155675551470588	0.0119485294117647	0.0175206801470588	0.00709443933823529	0.00537109375	0.00865981158088235	0.0142606847426471	0.00114889705882353	0.00272863051470588	0.00231215533088235	0	0.00517003676470588	0.00169462316176471	0.001953125	0.00109145220588235	0.000215418198529412	0.000689338235294118	0.00110581341911765	0.000114889705882353	0.00137867647058824	1.43612132352941e-05	0.000660615808823529	0.00188131893382353	0.000789866727941176	0.000933478860294118	0.00231215533088235	0.00116325827205882	0.000517003676470588	0.000157973345588235	0.000100528492647059	2.87224264705882e-05	0.000301585477941176	0.000201056985294118	0	0	0	0.000258501838235294	0.000186695772058824	0.000660615808823529	0.000186695772058824	0.000416475183823529
M744semF	0.258517126663381	0.12187345983243	0.123228807294234	0.200961064563825	0.0117822819122721	0.0402291769344505	0.00673053228191227	0.0417847461803844	0.107750123213406	0.00414305076392311	0.0126447757516018	0.00280310497782159	0.00389662395268605	0.00194061113849187	0.0199759733859044	0.0029109167077378	0.00149396254312469	6.16067028092657e-05	0	0.00312654016757023	0.00280310497782159	0.000646870379497289	0.00060066535239034	3.08033514046328e-05	0.000662272055199606	3.08033514046328e-05	1.54016757023164e-05	0.000492853622474125	0	0.000154016757023164	0.00038504189255791	0.00021562345983243	0.000231025135534746	0.000646870379497289	0.000785485460818137	0.000354238541153277	6.16067028092657e-05	6.16067028092657e-05	0.000107811729916215	7.70083785115821e-05	0.000169418432725481	0	0	3.08033514046328e-05	1.54016757023164e-05	6.16067028092657e-05	0.000246426811237063	3.08033514046328e-05	0.00043124691966486
M814semF	0.230323219591249	0.0701359503016116	0.340379940578014	0.141730440262897	0.0239848744035293	0.0150355631583686	0.00518591878995228	0.0195732420995768	0.0249392275141802	0.0103718375799046	0.00815701809669578	0.0066984784370217	0.0100477176555325	0.00280903934455749	0.00885927793283515	0.0017826595840461	0.00291707931934816	0.000270099936976681	0	0.00939947780678851	0.00181867290897632	0.00176465292158098	0.00221481948320879	0.00086431979832538	0.00478977221571982	0.000324119924372018	0.000900333123255605	0.00367335914288287	0	0.000522193211488251	9.00333123255605e-05	0.000990366435581165	0.00117043306023229	0.00109840641037184	0.00086431979832538	0.00293508598181327	0.00034212658683713	0.000270099936976681	0.000180066624651121	0.00034212658683713	9.00333123255605e-05	0	3.60133249302242e-05	0.000360133249302242	0.000288106599441793	0.000324119924372018	0.000810299810930044	7.20266498604484e-05	0.00145853965967408
M824semF	0.174682565087495	0.10620731967563	0.335747439180538	0.105113636363636	0.0342642979086641	0.041413252240717	0.0218736662398634	0.0134443021766965	0.0394126120358515	0.00414799402475459	0.0104166666666667	0.010163252240717	0.00489489970123773	0.012950810926163	0.011790439607341	0.00101365770379855	0.00514831412718737	0.00256081946222791	1.33376013657704e-05	0.00570849338454972	0.00273420827998293	0.00124039692701665	0.000120038412291933	9.33632095603927e-05	0.000186726419120785	0.00953638497652582	1.33376013657704e-05	0.00128040973111396	0	0.000613529662825437	0.00305431071276142	0.000946969696969697	0.000773580879214682	0.00126707212974819	0.000613529662825437	8.00256081946223e-05	0.000173388817755015	0	4.00128040973111e-05	0.000266752027315408	0.000200064020486556	0	5.33504054630815e-05	0.000106700810926163	0.000146713615023474	0.000106700810926163	0.000186726419120785	0.000146713615023474	0.000173388817755015
M834semF	0.245048532386455	0.0612948760859758	0.275463131393978	0.139426924923963	0.0400628665395754	0.00838220527671464	0.0147561738725497	0.0302836270500749	0.0320153673763406	0.0168517251917284	0.0296724245819812	0.0104923090356098	0.00873146382991108	0.00408923556034169	0.0080329467235182	0.00243025743265859	0.00595194784405606	0.000465678070928591	1.45524397165185e-05	0.00464222826956939	0.00146979641136837	0.00247391475180814	0.000683964666676368	0.000218286595747777	0.00174629276598222	0	0.00018918171631474	0.00295414526245325	1.45524397165185e-05	0.000683964666676368	5.82097588660739e-05	0.00116419517732148	0.000975013461006738	0.00165897812768311	0.00132427201420318	0.000756726865258961	0.000261943914897333	5.82097588660739e-05	0.000101867078015629	0.000392915872345999	0.00168808300711614	0	0	0.000363810992912962	0.000203734156031259	0.000247391475180814	0.00101867078015629	0.000232839035464296	0.000698517106392887
M844semF	0.190559523809524	0.123904761904762	0.140714285714286	0.0750833333333333	0.0764642857142857	0.0390952380952381	0.0304166666666667	0.00221428571428571	0.0528690476190476	0.0604880952380952	0.0676190476190476	0.0269761904761905	0.00386904761904762	0.0152857142857143	0.0103571428571429	0.000476190476190476	0.0161785714285714	0.00355952380952381	4.76190476190476e-05	0.00151190476190476	0.00596428571428571	0.000773809523809524	0.000273809523809524	5.95238095238095e-05	0.000333333333333333	0.00835714285714286	8.33333333333333e-05	0.000714285714285714	0	0.000321428571428571	0.000702380952380952	0.000738095238095238	0.000821428571428571	0.00172619047619048	0.000678571428571429	0.000321428571428571	0.000107142857142857	2.38095238095238e-05	0	5.95238095238095e-05	0.00541666666666667	0	1.19047619047619e-05	4.76190476190476e-05	5.95238095238095e-05	8.33333333333333e-05	0.000178571428571429	0.000107142857142857	0.000202380952380952
[truncated: 277 more columns]
